# Supplementary material for: Progesterone Inhibits the Establishment of Activation-Associated Chromatin During TH1 Differentiation
Source: Front Immunol. 2022 Feb 2;13:835625. doi: 10.3389/fimmu.2022.835625 (PMC8848251; doi:10.3389/fimmu.2022.835625)
Supplement: Supplementary file 4 [file Table_3.xlsx]

## Sheet: Table S3
Supplemental Table S3. Peak-to gene correlation for promoter regions. For each peak the gene with the highest absolute mean correlation was chosen. distanceToTSS describes the distance from the edge of the peak to the transcription start site (TSS) of the gene. If the TSS was within the peak distance was considered as 0. Negative values are upstream, positive values are downstream of TSS. Th1 and…
Peak	Gene	distanceToTSS	mean correlation	Standard deviation of the correlation	ATAC_Th1	ATAC_Prog	RNA_Th1	RNA_Prog	SYMBOL
chr1.28866.29452	ENSG00000227232	118	0.0719567	0.242797	FALSE	FALSE	TRUE	TRUE
chr1.629036.634974	ENSG00000225972	0	-0.255293	0.450767	FALSE	FALSE	TRUE	TRUE
chr1.629036.634974	ENSG00000225630	0	-0.466447	0.447653	FALSE	FALSE	TRUE	TRUE
chr1.629036.634974	ENSG00000237973	0	0.685721	0.230058	FALSE	FALSE	FALSE	FALSE
chr1.629036.634974	ENSG00000229344	0	0.512549	0.170826	FALSE	FALSE	TRUE	TRUE
chr1.629036.634974	ENSG00000248527	0	-0.283678	0.557069	FALSE	FALSE	TRUE	TRUE
chr1.629036.634974	ENSG00000198744	0	-0.0598751	0.375092	FALSE	FALSE	TRUE	TRUE
chr1.778333.779210	ENSG00000228327	0	0.245077	0.0338197	FALSE	FALSE	TRUE	TRUE
chr1.778333.779210	ENSG00000237491	0	0.123217	0.0583727	FALSE	FALSE	TRUE	FALSE	LINC01409
chr1.826878.828068	ENSG00000228794	1740	0.52575	0.127877	FALSE	FALSE	FALSE	FALSE	LINC01128
chr1.826878.828068	ENSG00000225880	0	0.610822	0.120327	FALSE	FALSE	FALSE	FALSE	LINC00115
chr1.959186.959485	ENSG00000188976	0	-0.430351	0.0078778	TRUE	TRUE	TRUE	TRUE	NOC2L
chr1.959186.959485	ENSG00000187961	-1102	-0.309622	0.171947	TRUE	TRUE	TRUE	TRUE	KLHL17
chr1.959740.959852	ENSG00000188976	-431	0.242516	0.242986	FALSE	FALSE	TRUE	TRUE	NOC2L
chr1.959740.959852	ENSG00000187961	-735	0.109196	0.0944424	FALSE	FALSE	TRUE	TRUE	KLHL17
chr1.960470.960660	ENSG00000188976	-1161	0.748682	0.00484361	FALSE	FALSE	TRUE	TRUE	NOC2L
chr1.960470.960660	ENSG00000187961	0	-0.0295821	0.455042	FALSE	FALSE	TRUE	TRUE	KLHL17
chr1.1000093.1000332	ENSG00000272512	-2042	0.241047	0.410749	TRUE	TRUE	TRUE	TRUE
chr1.1000093.1000332	ENSG00000188290	0	0.399863	0.467065	TRUE	TRUE	TRUE	TRUE	HES4
chr1.1000093.1000332	ENSG00000187608	-806	0.280278	0.0352922	TRUE	TRUE	FALSE	FALSE	ISG15
chr1.1019350.1020128	ENSG00000188157	0	-0.878763	0.102301	TRUE	TRUE	TRUE	TRUE	AGRN
chr1.1020605.1020696	ENSG00000188157	482	0.462523	0.0455302	FALSE	FALSE	TRUE	TRUE	AGRN
chr1.1059200.1059779	ENSG00000217801	0	0.669098	0.0178985	TRUE	FALSE	TRUE	TRUE	LOC100288175
chr1.1063887.1064803	ENSG00000273443	-599	0.961457	0.00608131	TRUE	TRUE	TRUE	TRUE
chr1.1115824.1116993	ENSG00000131591	0	-0.548499	0.0477921	TRUE	TRUE	TRUE	TRUE	C1orf159
chr1.1206515.1206825	ENSG00000186891	0	0.788299	0.0717738	TRUE	FALSE	TRUE	TRUE	TNFRSF18
chr1.1208024.1209355	ENSG00000186891	-1333	0.881162	0.065573	TRUE	FALSE	TRUE	TRUE	TNFRSF18
chr1.1212909.1213050	ENSG00000186827	1088	0.314248	0.172671	FALSE	FALSE	TRUE	TRUE	TNFRSF4
chr1.1213539.1213759	ENSG00000186827	379	0.876546	0.00413519	TRUE	FALSE	TRUE	TRUE	TNFRSF4
chr1.1213973.1214303	ENSG00000186827	0	0.913618	0.0253956	TRUE	TRUE	TRUE	TRUE	TNFRSF4
chr1.1214771.1214963	ENSG00000186827	-633	0.688946	0.130121	TRUE	TRUE	TRUE	TRUE	TNFRSF4
chr1.1215433.1215504	ENSG00000186827	-1295	0.620026	0.152822	TRUE	FALSE	TRUE	TRUE	TNFRSF4
chr1.1231154.1231516	ENSG00000078808	515	0.562374	0.353014	FALSE	FALSE	TRUE	TRUE	SDF4
chr1.1231154.1231516	ENSG00000176022	-749	0.620823	0.162267	FALSE	FALSE	TRUE	TRUE	B3GALT6
chr1.1231726.1232644	ENSG00000078808	0	-0.337914	0.072052	TRUE	TRUE	TRUE	TRUE	SDF4
chr1.1231726.1232644	ENSG00000176022	0	-0.558596	0.00254994	TRUE	TRUE	TRUE	TRUE	B3GALT6
chr1.1250255.1250416	ENSG00000260179	918	-0.866439	0.116095	FALSE	FALSE	TRUE	TRUE
chr1.1250956.1251237	ENSG00000260179	97	0.310732	0.022521	FALSE	FALSE	TRUE	TRUE
chr1.1273774.1274315	ENSG00000160087	0	-0.318213	0.312076	FALSE	FALSE	TRUE	TRUE	UBE2J2
chr1.1305390.1305853	ENSG00000169972	-2714	-0.426167	0.00990971	FALSE	FALSE	TRUE	TRUE	PUSL1
chr1.1307823.1309055	ENSG00000131584	554	0.486124	0.0377998	TRUE	TRUE	TRUE	TRUE	ACAP3
chr1.1307823.1309055	ENSG00000169972	0	-0.929691	0.059067	TRUE	TRUE	TRUE	TRUE	PUSL1
chr1.1324376.1325094	ENSG00000127054	0	-0.772634	0.132552	TRUE	TRUE	TRUE	TRUE	INTS11
chr1.1324376.1325094	ENSG00000224051	0	0.211394	0.118106	TRUE	TRUE	TRUE	TRUE	CPTP
chr1.1349108.1350024	ENSG00000107404	0	-0.069254	0.32326	TRUE	TRUE	TRUE	TRUE	DVL1
chr1.1374991.1375677	ENSG00000175756	0	0.463381	0.225844	TRUE	TRUE	TRUE	TRUE	AURKAIP1
chr1.1398694.1398793	ENSG00000221978	535	-0.18722	0.0270502	TRUE	TRUE	TRUE	TRUE	CCNL2
chr1.1398694.1398793	ENSG00000224870	-729	0.536293	0.0096551	TRUE	TRUE	TRUE	TRUE	MRPL20-AS1
chr1.1399265.1400219	ENSG00000221978	0	0.562803	0.0578097	FALSE	FALSE	TRUE	TRUE	CCNL2
chr1.1399265.1400219	ENSG00000224870	0	-0.00652474	0.311874	FALSE	FALSE	TRUE	TRUE	MRPL20-AS1
chr1.1407035.1407462	ENSG00000242485	0	-0.266132	0.210098	FALSE	FALSE	TRUE	TRUE	MRPL20
chr1.1407035.1407462	ENSG00000264293	-1283	-0.122889	0.153867	FALSE	FALSE	FALSE	FALSE
chr1.1407035.1407462	ENSG00000272455	-1634	-0.343091	0.0455416	FALSE	FALSE	FALSE	FALSE
chr1.1471464.1471873	ENSG00000160072	0	-0.109782	0.49632	TRUE	TRUE	TRUE	TRUE	ATAD3B
chr1.1472361.1472470	ENSG00000160072	592	0.97812	0.0125878	TRUE	FALSE	TRUE	TRUE	ATAD3B
chr1.1505051.1505191	ENSG00000284740	1801	0.159991	0.283582	FALSE	FALSE	TRUE	FALSE
chr1.1511577.1512265	ENSG00000197785	0	-0.290225	0.407049	FALSE	FALSE	TRUE	TRUE	ATAD3A
chr1.1512765.1512869	ENSG00000197785	614	0.933105	0.0338557	TRUE	TRUE	TRUE	TRUE	ATAD3A
chr1.1574368.1575240	ENSG00000160075	0	-0.0880522	0.296995	FALSE	FALSE	FALSE	FALSE	SSU72
chr1.1574368.1575240	ENSG00000215014	0	0.884587	0.0712965	FALSE	FALSE	TRUE	TRUE
chr1.1614341.1614784	ENSG00000272106	1011	0.434948	0.025304	FALSE	FALSE	TRUE	TRUE
chr1.1614341.1614784	ENSG00000197530	-631	0.655757	0.0610614	FALSE	FALSE	TRUE	TRUE	MIB2
chr1.1615124.1616317	ENSG00000272106	0	0.97534	0.0141261	TRUE	TRUE	TRUE	TRUE
chr1.1615124.1616317	ENSG00000197530	0	0.90102	0.0291953	TRUE	TRUE	TRUE	TRUE	MIB2
chr1.1628888.1629196	ENSG00000189409	-2899	-0.488967	0.0110864	FALSE	FALSE	FALSE	FALSE	MMP23B
chr1.1629431.1630700	ENSG00000189409	-1395	0.820047	0.0766035	TRUE	TRUE	FALSE	FALSE	MMP23B
chr1.1658723.1659509	ENSG00000248333	0	-0.194174	0.272662	FALSE	FALSE	TRUE	TRUE	CDK11B
chr1.1692201.1693612	ENSG00000189339	0	0.74388	0.23831	FALSE	FALSE	TRUE	TRUE	SLC35E2B
chr1.1693893.1693966	ENSG00000189339	-1165	-0.00756902	0.655816	FALSE	FALSE	TRUE	TRUE	SLC35E2B
chr1.1724063.1724825	ENSG00000008128	0	0.565138	0.0152192	FALSE	FALSE	FALSE	FALSE	CDK11A
chr1.1724063.1724825	ENSG00000227775	0	0.971652	0.00275077	FALSE	FALSE	TRUE	TRUE
chr1.1745770.1747325	ENSG00000215790	0	0.603661	0.317343	FALSE	FALSE	TRUE	TRUE	SLC35E2A
chr1.1778367.1779284	ENSG00000008130	1173	0.200844	0.0995902	FALSE	FALSE	TRUE	TRUE	NADK
chr1.1780230.1780641	ENSG00000008130	0	-0.762506	0.0432442	TRUE	FALSE	TRUE	TRUE	NADK
chr1.1890428.1891794	ENSG00000078369	0	-0.814958	0.0937074	TRUE	TRUE	TRUE	TRUE	GNB1
chr1.1919082.1919817	ENSG00000178821	0	-0.87462	0.0417877	FALSE	FALSE	TRUE	TRUE	TMEM52
chr1.2050102.2050765	ENSG00000067606	0	-0.144459	0.0563346	TRUE	TRUE	TRUE	TRUE	PRKCZ
chr1.2227401.2228156	ENSG00000157933	-539	0.580729	0.0892995	TRUE	FALSE	TRUE	TRUE	SKI
chr1.2229216.2229391	ENSG00000157933	521	-0.264621	0.333949	TRUE	TRUE	TRUE	TRUE	SKI
chr1.2230994.2232332	ENSG00000157933	2299	0.717503	0.000431468	TRUE	FALSE	TRUE	TRUE	SKI
chr1.2391464.2392101	ENSG00000116151	0	0.199236	0.477214	TRUE	TRUE	TRUE	TRUE	MORN1
chr1.2391464.2392101	ENSG00000157916	0	-0.0714538	0.882919	TRUE	TRUE	TRUE	TRUE	RER1
chr1.2412172.2413093	ENSG00000157911	704	-0.317596	0.0237525	FALSE	FALSE	TRUE	TRUE	PEX10
chr1.2414494.2414661	ENSG00000157911	-697	-0.537934	0.106862	FALSE	FALSE	TRUE	TRUE	PEX10
chr1.2415871.2415993	ENSG00000157911	-2074	-0.0508741	0.203969	FALSE	FALSE	TRUE	TRUE	PEX10
chr1.2523362.2524248	ENSG00000157881	2380	0.223528	0.484474	TRUE	FALSE	TRUE	TRUE	PANK4
chr1.2525965.2527130	ENSG00000157881	0	-0.429217	0.33667	FALSE	FALSE	TRUE	TRUE	PANK4
chr1.2529087.2529229	ENSG00000157881	-2459	-0.153143	0.680285	FALSE	FALSE	TRUE	TRUE	PANK4
chr1.2543580.2543727	ENSG00000272449	-2738	0.835698	0.11719	TRUE	TRUE	TRUE	TRUE
chr1.2546068.2549221	ENSG00000272449	0	0.76153	0.137066	TRUE	FALSE	TRUE	TRUE
chr1.2554967.2555351	ENSG00000238164	1680	0.671514	0.221401	FALSE	FALSE	FALSE	FALSE
chr1.2554967.2555351	ENSG00000157873	-288	0.76236	0.0799738	FALSE	FALSE	TRUE	TRUE	TNFRSF14
chr1.2555604.2556674	ENSG00000238164	357	-0.310445	0.443031	FALSE	FALSE	FALSE	FALSE
chr1.2555604.2556674	ENSG00000157873	0	0.16556	0.535081	FALSE	FALSE	TRUE	TRUE	TNFRSF14
chr1.2577544.2578703	ENSG00000228037	-2857	0.893402	0.0714016	FALSE	FALSE	FALSE	FALSE	LOC100996583
chr1.2584205.2584396	ENSG00000228037	2645	0.86744	0.0944423	TRUE	FALSE	FALSE	FALSE	LOC100996583
chr1.2584205.2584396	ENSG00000157870	-2095	-0.725624	0.00107118	TRUE	FALSE	FALSE	FALSE	PRXL2B
chr1.2585273.2586064	ENSG00000157870	-427	-0.431411	0.246593	TRUE	FALSE	FALSE	FALSE	PRXL2B
chr1.2586306.2587392	ENSG00000157870	0	0.00302835	0.188147	FALSE	FALSE	FALSE	FALSE	PRXL2B
chr1.3611656.3611744	ENSG00000162591	-161	-0.383234	0.134993	FALSE	FALSE	TRUE	TRUE	MEGF6
chr1.3624501.3625264	ENSG00000158109	0	0.893229	0.0697257	TRUE	FALSE	TRUE	TRUE	TPRG1L
chr1.3649995.3650329	ENSG00000116213	2432	0.124478	0.0086713	TRUE	TRUE	TRUE	TRUE	WRAP73
chr1.3747302.3747564	ENSG00000227372	0	0.495547	0.118523	FALSE	FALSE	TRUE	TRUE	TP73-AS1
chr1.3796429.3796705	ENSG00000130764	0	-0.0630439	0.205241	FALSE	FALSE	TRUE	TRUE	LRRC47
chr1.3856908.3857751	ENSG00000116198	0	-0.233674	0.592486	TRUE	FALSE	TRUE	TRUE	CEP104
chr1.3856908.3857751	ENSG00000169598	0	-0.577549	0.249429	TRUE	FALSE	TRUE	TRUE	DFFB
chr1.3900021.3901542	ENSG00000198912	0	-0.845648	0.0392704	TRUE	TRUE	TRUE	TRUE	C1orf174
chr1.3902269.3902749	ENSG00000198912	-1976	-0.338746	0.0190536	FALSE	FALSE	TRUE	TRUE	C1orf174
chr1.5991579.5991701	ENSG00000131697	772	0.185799	0.27552	FALSE	FALSE	TRUE	TRUE	NPHP4
chr1.5991579.5991701	ENSG00000069424	113	0.0527692	0.172573	FALSE	FALSE	TRUE	TRUE	KCNAB2
chr1.5991911.5992954	ENSG00000131697	0	0.0448577	0.0300086	FALSE	FALSE	TRUE	TRUE	NPHP4
chr1.5991911.5992954	ENSG00000069424	445	-0.761562	0.0424217	FALSE	FALSE	TRUE	TRUE	KCNAB2
chr1.5993314.5993417	ENSG00000131697	-841	0.412138	0.0832059	FALSE	FALSE	TRUE	TRUE	NPHP4
chr1.5993314.5993417	ENSG00000069424	1848	0.355032	0.112168	FALSE	FALSE	TRUE	TRUE	KCNAB2
chr1.5994803.5994985	ENSG00000131697	-2330	-0.0253608	0.0725131	TRUE	TRUE	TRUE	TRUE	NPHP4
chr1.6205298.6205474	ENSG00000158286	-1	0.630485	0.179657	TRUE	TRUE	FALSE	FALSE	RNF207
chr1.6205955.6206391	ENSG00000116251	2998	-0.680215	0.254738	TRUE	TRUE	TRUE	TRUE	RPL22
chr1.6205955.6206391	ENSG00000158286	480	0.707888	0.229605	TRUE	TRUE	FALSE	FALSE	RNF207
chr1.6235716.6236198	ENSG00000116237	0	0.167774	0.580729	FALSE	FALSE	TRUE	TRUE	ICMT
chr1.6261028.6261188	ENSG00000158292	-53	-0.833512	0.0735749	FALSE	FALSE	FALSE	FALSE	GPR153
chr1.6393074.6394174	ENSG00000097021	217	-0.348563	0.416958	FALSE	FALSE	TRUE	TRUE	ACOT7
chr1.6423548.6423729	ENSG00000187017	-1059	0.439146	0.231915	FALSE	FALSE	TRUE	TRUE	ESPN
chr1.6463731.6463869	ENSG00000215788	2326	0.16044	0.476107	FALSE	FALSE	TRUE	TRUE	TNFRSF25
chr1.6464593.6464779	ENSG00000215788	1416	0.462877	0.240907	FALSE	FALSE	TRUE	TRUE	TNFRSF25
chr1.6465349.6466487	ENSG00000215788	0	0.262546	0.344457	TRUE	TRUE	TRUE	TRUE	TNFRSF25
chr1.6554451.6554713	ENSG00000162408	0	-0.105345	0.193453	FALSE	FALSE	TRUE	TRUE	NOL9
chr1.6579758.6580280	ENSG00000204859	0	0.276719	0.529736	FALSE	FALSE	TRUE	TRUE	ZBTB48
chr1.6612915.6614054	ENSG00000162413	553	-0.20142	0.017479	TRUE	FALSE	TRUE	TRUE	KLHL21
chr1.6612915.6614054	ENSG00000116273	0	-0.582289	0.051862	TRUE	FALSE	TRUE	TRUE	PHF13
chr1.6614207.6614306	ENSG00000162413	301	0.603631	0.0417464	FALSE	FALSE	TRUE	TRUE	KLHL21
chr1.6614207.6614306	ENSG00000116273	522	0.11676	0.172648	FALSE	FALSE	TRUE	TRUE	PHF13
chr1.6614733.6614842	ENSG00000162413	-126	0.317844	0.121446	FALSE	FALSE	TRUE	TRUE	KLHL21
chr1.6614733.6614842	ENSG00000116273	1048	-0.387697	0.248041	FALSE	FALSE	TRUE	TRUE	PHF13
chr1.6625005.6625477	ENSG00000041988	139	-0.173975	0.588039	FALSE	FALSE	TRUE	TRUE	THAP3
chr1.6701553.6702217	ENSG00000007923	0	0.60692	0.130643	FALSE	FALSE	TRUE	TRUE	DNAJC11
chr1.6784473.6785615	ENSG00000171735	0	-0.701517	0.109921	TRUE	TRUE	TRUE	TRUE	CAMTA1
chr1.7771171.7771334	ENSG00000049245	0	0.274514	0.331692	FALSE	FALSE	TRUE	TRUE	VAMP3
chr1.7783787.7784527	ENSG00000049246	0	-0.353445	0.288683	FALSE	FALSE	TRUE	TRUE	PER3
chr1.7940759.7941085	ENSG00000049249	2080	0.984192	0.00381915	TRUE	FALSE	TRUE	TRUE	TNFRSF9
chr1.7953929.7954676	ENSG00000116288	0	0.716939	0.0128093	TRUE	TRUE	TRUE	TRUE	PARK7
chr1.8026106.8026520	ENSG00000116285	0	0.192512	0.473484	FALSE	FALSE	TRUE	TRUE	ERRFI1
chr1.8317990.8318208	ENSG00000162426	164	-0.764434	0.0544021	FALSE	FALSE	TRUE	TRUE	SLC45A1
chr1.8817181.8817316	ENSG00000142599	327	0.0802712	0.405854	FALSE	FALSE	TRUE	TRUE	RERE
chr1.8817539.8818233	ENSG00000142599	0	0.640146	0.0470253	TRUE	TRUE	TRUE	TRUE	RERE
chr1.8876911.8877099	ENSG00000074800	2150	0.831363	0.0317914	FALSE	FALSE	TRUE	TRUE	ENO1
chr1.8877476.8877584	ENSG00000074800	1665	0.0275576	0.446272	FALSE	FALSE	TRUE	TRUE	ENO1
chr1.8877897.8879567	ENSG00000074800	0	0.759958	0.054323	FALSE	FALSE	TRUE	TRUE	ENO1
chr1.8880016.8880314	ENSG00000074800	-767	0.824677	0.0181239	TRUE	FALSE	TRUE	TRUE	ENO1
chr1.8946523.8946906	ENSG00000131686	656	0.243293	0.148646	TRUE	TRUE	TRUE	TRUE	CA6
chr1.9128768.9129758	ENSG00000180758	0	0.468962	0.0356858	TRUE	FALSE	FALSE	FALSE	GPR157
chr1.9234221.9235229	ENSG00000049239	0	0.868436	0.00197349	TRUE	FALSE	TRUE	TRUE	H6PD
chr1.9292722.9293017	ENSG00000171621	0	0.900998	0.0269126	FALSE	FALSE	TRUE	TRUE	SPSB1
chr1.9293537.9293624	ENSG00000171621	657	0.63477	0.0518178	FALSE	FALSE	TRUE	TRUE	SPSB1
chr1.9539161.9540120	ENSG00000171612	0	-0.783443	0.00980115	FALSE	FALSE	TRUE	TRUE	SLC25A33
chr1.9588513.9588908	ENSG00000188807	-14	-0.63386	0.178153	TRUE	TRUE	TRUE	TRUE	TMEM201
chr1.9589432.9589522	ENSG00000188807	510	-0.00839446	0.371716	FALSE	FALSE	TRUE	TRUE	TMEM201
chr1.9651622.9652776	ENSG00000171608	0	0.864802	0.0468755	TRUE	FALSE	TRUE	TRUE	PIK3CD
chr1.9653311.9654753	ENSG00000171608	1579	0.382408	0.372726	TRUE	TRUE	TRUE	TRUE	PIK3CD
chr1.9687186.9687744	ENSG00000231789	0	-0.72534	0.193689	FALSE	FALSE	TRUE	FALSE	PIK3CD-AS2
chr1.9689408.9689603	ENSG00000231789	-1853	0.0235391	0.27398	FALSE	FALSE	TRUE	FALSE	PIK3CD-AS2
chr1.9823877.9824671	ENSG00000171603	0	0.836261	0.0702261	TRUE	TRUE	TRUE	TRUE	CLSTN1
chr1.9825525.9825644	ENSG00000171603	-999	0.646611	0.138029	FALSE	FALSE	TRUE	TRUE	CLSTN1
chr1.9910005.9911260	ENSG00000178585	0	0.758963	0.0327266	TRUE	TRUE	TRUE	TRUE	CTNNBIP1
chr1.9942472.9942637	ENSG00000162441	770	0.746464	0.130341	FALSE	FALSE	TRUE	FALSE	LZIC
chr1.9942472.9942637	ENSG00000173614	-791	0.126129	0.75513	FALSE	FALSE	TRUE	TRUE	NMNAT1
chr1.9943191.9943550	ENSG00000162441	0	0.645378	0.0895259	TRUE	FALSE	TRUE	FALSE	LZIC
chr1.9943191.9943550	ENSG00000173614	0	0.302963	0.213928	TRUE	FALSE	TRUE	TRUE	NMNAT1
chr1.10032572.10033449	ENSG00000130939	0	-0.479373	0.250841	FALSE	FALSE	TRUE	TRUE	UBE4B
chr1.10209807.10210771	ENSG00000054523	-34	0.108719	0.0635433	FALSE	FALSE	FALSE	FALSE	KIF1B
chr1.10398422.10399529	ENSG00000142657	0	-0.732307	0.182835	FALSE	FALSE	TRUE	TRUE	PGD
chr1.10430276.10430821	ENSG00000251503	174	-0.0335617	0.338302	FALSE	FALSE	FALSE	FALSE	CENPS-CORT
chr1.10430276.10430821	ENSG00000175279	0	-0.315233	0.197795	FALSE	FALSE	TRUE	TRUE	CENPS
chr1.10472267.10472718	ENSG00000160049	0	-0.00228976	0.345437	FALSE	FALSE	TRUE	TRUE	DFFA
chr1.10472267.10472718	ENSG00000142655	0	-0.280497	0.156712	FALSE	FALSE	TRUE	TRUE	PEX14
chr1.10474785.10475219	ENSG00000160049	-2259	0.728733	0.110943	FALSE	FALSE	TRUE	TRUE	DFFA
chr1.10474785.10475219	ENSG00000142655	2497	0.406264	0.261817	FALSE	FALSE	TRUE	TRUE	PEX14
chr1.11012218.11013192	ENSG00000120948	0	-0.615956	0.363377	TRUE	TRUE	FALSE	FALSE	TARDBP
chr1.11012218.11013192	ENSG00000277726	0	0.783627	0.0378112	TRUE	TRUE	TRUE	FALSE
chr1.11059478.11060728	ENSG00000116649	0	0.597311	0.0605358	FALSE	FALSE	TRUE	TRUE	SRM
chr1.11060923.11061148	ENSG00000116649	-899	0.957045	0.00974542	TRUE	FALSE	TRUE	TRUE	SRM
chr1.11099336.11100183	ENSG00000171824	0	0.853546	0.0298409	TRUE	FALSE	TRUE	TRUE	EXOSC10
chr1.11262458.11262937	ENSG00000198793	0	-0.673744	0.178573	FALSE	FALSE	TRUE	TRUE	MTOR
chr1.11272978.11273772	ENSG00000120942	0	0.0797859	0.0925	FALSE	FALSE	TRUE	FALSE	UBIAD1
chr1.11654671.11654953	ENSG00000116661	832	0.842226	0.0820649	FALSE	FALSE	TRUE	TRUE	FBXO2
chr1.11654671.11654953	ENSG00000132879	296	0.434699	0.325641	FALSE	FALSE	TRUE	TRUE	FBXO44
chr1.11664097.11664304	ENSG00000116663	0	-0.638186	0.206992	FALSE	FALSE	TRUE	TRUE	FBXO6
chr1.11664602.11664809	ENSG00000116663	478	0.580201	0.207911	FALSE	FALSE	TRUE	TRUE	FBXO6
chr1.11736027.11736207	ENSG00000177674	0	0.336324	0.0415409	FALSE	FALSE	TRUE	TRUE	AGTRAP
chr1.11736767.11736929	ENSG00000177674	683	0.187483	0.0298897	FALSE	FALSE	TRUE	TRUE	AGTRAP
chr1.11803527.11803703	ENSG00000011021	-2393	0.11049	0.392197	FALSE	FALSE	TRUE	TRUE	CLCN6
chr1.11804873.11805081	ENSG00000177000	1839	-0.931357	0.0364037	FALSE	FALSE	TRUE	TRUE	MTHFR
chr1.11804873.11805081	ENSG00000011021	-1015	0.037479	0.524755	FALSE	FALSE	TRUE	TRUE	CLCN6
chr1.11805495.11806533	ENSG00000177000	387	0.816402	0.130737	TRUE	TRUE	TRUE	TRUE	MTHFR
chr1.11805495.11806533	ENSG00000011021	0	0.224134	0.275772	TRUE	TRUE	TRUE	TRUE	CLCN6
chr1.11926336.11926615	ENSG00000116685	0	-0.863048	0.129693	FALSE	FALSE	TRUE	TRUE	KIAA2013
chr1.11934497.11934977	ENSG00000083444	292	0.668814	0.190241	TRUE	FALSE	TRUE	TRUE	PLOD1
chr1.11980037.11980724	ENSG00000116688	0	0.29668	0.0314257	TRUE	TRUE	TRUE	TRUE	MFN2
chr1.12019172.12019615	ENSG00000116691	0	0.261892	0.255062	FALSE	FALSE	TRUE	TRUE	MIIP
chr1.12166819.12168003	ENSG00000028137	0	0.240556	0.392385	FALSE	FALSE	TRUE	TRUE	TNFRSF1B
chr1.12229856.12230285	ENSG00000048707	0	0.82362	0.115797	FALSE	FALSE	TRUE	TRUE	VPS13D
chr1.12616724.12616834	ENSG00000162496	897	0.103904	0.671196	FALSE	FALSE	FALSE	FALSE	DHRS3
chr1.12617548.12618658	ENSG00000162496	0	0.282491	0.630808	TRUE	TRUE	FALSE	FALSE	DHRS3
chr1.12618884.12619632	ENSG00000162496	-1153	-0.288841	0.515862	TRUE	TRUE	FALSE	FALSE	DHRS3
chr1.12619921.12620123	ENSG00000162496	-2190	-0.180247	0.622283	FALSE	FALSE	FALSE	FALSE	DHRS3
chr1.13700141.13700918	ENSG00000116731	0	0.798652	0.128575	TRUE	TRUE	FALSE	FALSE	PRDM2
chr1.13702880.13703049	ENSG00000116731	2682	-0.161789	0.479436	TRUE	TRUE	FALSE	FALSE	PRDM2
chr1.15409383.15409996	ENSG00000142634	0	0.773198	0.129479	TRUE	TRUE	FALSE	FALSE	EFHD2
chr1.15411759.15411872	ENSG00000142634	1864	-0.343248	0.396571	FALSE	FALSE	FALSE	FALSE	EFHD2
chr1.15412233.15412418	ENSG00000142634	2338	0.877828	0.0033608	FALSE	FALSE	FALSE	FALSE	EFHD2
chr1.15523962.15525466	ENSG00000132906	1068	0.797163	0.0335617	TRUE	TRUE	TRUE	TRUE	CASP9
chr1.15523962.15525466	ENSG00000116138	-1347	-0.334446	0.0450623	TRUE	TRUE	FALSE	FALSE	DNAJC16
chr1.15526447.15527186	ENSG00000132906	0	0.814189	0.0236481	FALSE	FALSE	TRUE	TRUE	CASP9
chr1.15526447.15527186	ENSG00000116138	0	-0.519198	0.0193969	FALSE	FALSE	FALSE	FALSE	DNAJC16
chr1.15584614.15584715	ENSG00000116771	395	0.844149	0.13515	TRUE	TRUE	TRUE	FALSE	AGMAT
chr1.15617070.15618086	ENSG00000197312	0	-0.702233	0.0262132	FALSE	FALSE	TRUE	TRUE	DDI2
chr1.15684234.15684374	ENSG00000116786	0	0.364969	0.0915556	FALSE	FALSE	TRUE	TRUE	PLEKHM2
chr1.15847042.15848906	ENSG00000179743	0	0.946918	0.038765	TRUE	FALSE	TRUE	TRUE	FLJ37453
chr1.15847042.15848906	ENSG00000065526	0	-0.518411	0.0446369	TRUE	FALSE	TRUE	TRUE	SPEN
chr1.15849369.15849576	ENSG00000179743	-1222	0.469656	0.107619	FALSE	FALSE	TRUE	TRUE	FLJ37453
chr1.15849369.15849576	ENSG00000065526	1505	-0.37124	0.0755849	FALSE	FALSE	TRUE	TRUE	SPEN
chr1.15849884.15849969	ENSG00000179743	-1737	-0.558045	0.308593	FALSE	FALSE	TRUE	TRUE	FLJ37453
chr1.15849884.15849969	ENSG00000065526	2020	0.688874	0.246704	FALSE	FALSE	TRUE	TRUE	SPEN
chr1.15850176.15850289	ENSG00000179743	-2029	-0.171367	0.326392	FALSE	FALSE	TRUE	TRUE	FLJ37453
chr1.15850176.15850289	ENSG00000065526	2312	0.626423	0.348193	FALSE	FALSE	TRUE	TRUE	SPEN
chr1.15975005.15975212	ENSG00000116809	920	0.433602	0.0684069	TRUE	FALSE	TRUE	TRUE	ZBTB17
chr1.15975413.15976281	ENSG00000116809	0	0.499948	0.0865401	TRUE	FALSE	TRUE	TRUE	ZBTB17
chr1.16158110.16158301	ENSG00000142627	-2023	-0.458287	0.224759	TRUE	FALSE	FALSE	FALSE	EPHA2
chr1.16236230.16236426	ENSG00000132881	736	-0.772229	0.0185084	FALSE	FALSE	TRUE	TRUE	CPLANE2
chr1.16236710.16236839	ENSG00000132881	323	0.322433	0.343879	FALSE	FALSE	TRUE	TRUE	CPLANE2
chr1.16237066.16237348	ENSG00000132881	0	-0.237396	0.338967	TRUE	TRUE	TRUE	TRUE	CPLANE2
chr1.16351976.16352858	ENSG00000037637	0	0.532349	0.167098	FALSE	FALSE	TRUE	TRUE	FBXO42
chr1.16351976.16352858	ENSG00000055070	0	-0.519528	0.279525	FALSE	FALSE	TRUE	TRUE	SZRD1
chr1.16440512.16440823	ENSG00000157191	0	0.105424	0.213184	FALSE	FALSE	FALSE	FALSE	NECAP2
chr1.16441109.16441560	ENSG00000157191	437	0.853987	0.13477	TRUE	TRUE	FALSE	FALSE	NECAP2
chr1.16499065.16499391	ENSG00000080947	0	0.83308	0.028235	FALSE	FALSE	TRUE	TRUE	CROCCP3
chr1.16512912.16514909	ENSG00000206652	0	-0.499004	0.240665	TRUE	TRUE	FALSE	FALSE	RNU1-1
chr1.16612727.16614022	ENSG00000219481	0	-0.278263	0.459109	FALSE	FALSE	TRUE	TRUE	NBPF1
chr1.16644295.16645199	ENSG00000283773	-1186	0.0701148	0.490314	FALSE	FALSE	FALSE	FALSE
chr1.16644295.16645199	ENSG00000186301	-423	0.450057	0.127535	FALSE	FALSE	TRUE	TRUE
chr1.16665834.16667540	ENSG00000207513	0	-0.489783	0.254213	TRUE	TRUE	FALSE	FALSE	RNU1-3
chr1.16739923.16741627	ENSG00000058453	0	-0.288261	0.403424	TRUE	TRUE	TRUE	TRUE	CROCC
chr1.16739923.16741627	ENSG00000207389	0	-0.489904	0.261493	TRUE	TRUE	FALSE	FALSE	RNU1-4
chr1.16889187.16889797	ENSG00000238142	0	-0.521492	0.399178	FALSE	FALSE	TRUE	TRUE	LOC105376805
chr1.16889187.16889797	ENSG00000235241	92	-0.502631	0.281711	FALSE	FALSE	TRUE	TRUE
chr1.16895385.16897491	ENSG00000207005	0	-0.492903	0.244218	TRUE	TRUE	FALSE	FALSE	RNU1-2
chr1.17011659.17012133	ENSG00000159363	0	-0.084386	0.53008	FALSE	FALSE	TRUE	TRUE	ATP13A2
chr1.17053963.17054554	ENSG00000117118	0	-0.860399	0.0293639	FALSE	FALSE	TRUE	TRUE	SDHB
chr1.17437643.17438175	ENSG00000179051	1549	0.796721	0.0468484	FALSE	FALSE	TRUE	TRUE	RCC2
chr1.17438415.17438779	ENSG00000179051	945	0.857583	0.0403793	TRUE	TRUE	TRUE	TRUE	RCC2
chr1.17439606.17439946	ENSG00000179051	0	-0.503136	0.00983299	FALSE	FALSE	TRUE	TRUE	RCC2
chr1.18902421.18903046	ENSG00000159423	0	-0.528095	0.167457	TRUE	TRUE	TRUE	TRUE	ALDH4A1
chr1.18955384.18957045	ENSG00000169991	0	-0.105123	0.12992	TRUE	FALSE	TRUE	FALSE	IFFO2
chr1.18958096.18958239	ENSG00000169991	-1410	-0.500721	0.0368895	TRUE	FALSE	TRUE	FALSE	IFFO2
chr1.19074356.19074828	ENSG00000272084	683	-0.0174459	0.160449	TRUE	FALSE	TRUE	TRUE
chr1.19075100.19075226	ENSG00000272084	285	-0.206394	0.283476	TRUE	TRUE	TRUE	TRUE
chr1.19209636.19210763	ENSG00000127481	0	-0.19293	0.24815	TRUE	TRUE	TRUE	TRUE	UBR4
chr1.19209636.19210763	ENSG00000230424	0	-0.489707	0.0040482	TRUE	TRUE	TRUE	TRUE	EMC1-AS1
chr1.19251445.19252082	ENSG00000127463	0	-0.41068	0.0406569	FALSE	FALSE	TRUE	TRUE	EMC1
chr1.19251445.19252082	ENSG00000053372	0	-0.510245	0.0180524	FALSE	FALSE	TRUE	TRUE	MRTO4
chr1.19252333.19252495	ENSG00000127463	-781	0.953031	0.0304101	FALSE	FALSE	TRUE	TRUE	EMC1
chr1.19252333.19252495	ENSG00000053372	794	0.969597	0.00624446	FALSE	FALSE	TRUE	TRUE	MRTO4
chr1.19312030.19312300	ENSG00000053371	0	0.843075	0.0388065	TRUE	FALSE	TRUE	TRUE	AKR7A2
chr1.19312030.19312300	ENSG00000040487	-26	0.775246	0.0704462	TRUE	FALSE	FALSE	FALSE	SLC66A1
chr1.19484442.19484539	ENSG00000077549	1000	-0.529393	0.0621278	FALSE	FALSE	FALSE	FALSE	CAPZB
chr1.19485424.19486293	ENSG00000077549	0	-0.499095	0.173393	TRUE	TRUE	FALSE	FALSE	CAPZB
chr1.19488302.19488465	ENSG00000077549	-2763	-0.227405	0.0339973	TRUE	FALSE	FALSE	FALSE	CAPZB
chr1.19596603.19597850	ENSG00000173436	0	-0.148902	0.310046	TRUE	TRUE	TRUE	TRUE	MICOS10
chr1.19799631.19800533	ENSG00000162542	0	0.0698669	0.0160927	TRUE	TRUE	FALSE	FALSE	TMCO4
chr1.19882155.19882522	ENSG00000169914	0	0.340546	0.238395	FALSE	FALSE	TRUE	TRUE	OTUD3
chr1.20185416.20185631	ENSG00000162543	-454	0.302347	0.0749875	TRUE	TRUE	FALSE	FALSE	UBXN10
chr1.20186466.20186647	ENSG00000162543	381	-0.362186	0.278893	TRUE	TRUE	FALSE	FALSE	UBXN10
chr1.20187274.20187755	ENSG00000162543	1189	-0.265254	0.435606	TRUE	TRUE	FALSE	FALSE	UBXN10
chr1.20486252.20486391	ENSG00000162545	-32	-0.733187	0.197345	FALSE	FALSE	FALSE	FALSE	CAMK2N1
chr1.20507760.20507859	ENSG00000090432	302	-0.227234	0.265013	FALSE	FALSE	FALSE	TRUE	MUL1
chr1.20508075.20508288	ENSG00000090432	0	0.4236	0.136779	FALSE	FALSE	FALSE	TRUE	MUL1
chr1.20633366.20633527	ENSG00000158828	0	0.316978	0.283515	FALSE	FALSE	TRUE	TRUE	PINK1
chr1.20633900.20634092	ENSG00000158828	445	0.940719	0.0109085	TRUE	FALSE	TRUE	TRUE	PINK1
chr1.20661275.20661957	ENSG00000244038	0	0.293795	0.0606654	FALSE	FALSE	TRUE	TRUE	DDOST
chr1.20732146.20732443	ENSG00000189410	394	0.956733	0.0251322	TRUE	TRUE	TRUE	TRUE	SH2D5
chr1.20733054.20733508	ENSG00000189410	-217	0.94541	0.0233904	TRUE	FALSE	TRUE	TRUE	SH2D5
chr1.20786041.20787781	ENSG00000127483	0	0.942139	0.0432364	TRUE	FALSE	TRUE	TRUE	HP1BP3
chr1.21175490.21175615	ENSG00000075151	1273	-0.160379	0.0609231	FALSE	FALSE	TRUE	TRUE	EIF4G3
chr1.21176238.21177145	ENSG00000075151	0	-0.759326	0.176698	FALSE	FALSE	TRUE	TRUE	EIF4G3
chr1.21292805.21295323	ENSG00000231105	0	-0.828047	0.0592606	TRUE	TRUE	TRUE	TRUE	ECE1-AS1
chr1.21343527.21343744	ENSG00000117298	1760	0.896544	0.0633472	TRUE	FALSE	TRUE	TRUE	ECE1
chr1.21345163.21345940	ENSG00000117298	0	-0.429996	0.0385495	FALSE	FALSE	TRUE	TRUE	ECE1
chr1.21439750.21440419	ENSG00000142794	0	0.152923	0.367606	FALSE	FALSE	TRUE	TRUE	NBPF3
chr1.21782502.21783800	ENSG00000090686	0	0.681132	0.20483	TRUE	FALSE	TRUE	TRUE	USP48
chr1.21937347.21937514	ENSG00000142798	-50	0.944863	0.0269869	FALSE	FALSE	TRUE	TRUE	HSPG2
chr1.22022953.22023056	ENSG00000218510	-1502	-0.349175	0.351348	FALSE	FALSE	FALSE	FALSE	LINC00339
chr1.22024441.22026356	ENSG00000218510	0	0.710729	0.151124	TRUE	TRUE	FALSE	FALSE	LINC00339
chr1.22027015.22027204	ENSG00000218510	2457	-0.974081	0.00953647	TRUE	FALSE	FALSE	FALSE	LINC00339
chr1.22052458.22054111	ENSG00000070831	0	-0.386071	0.393544	TRUE	TRUE	TRUE	TRUE	CDC42
chr1.22451672.22452631	ENSG00000184677	0	0.747015	0.0289805	TRUE	TRUE	FALSE	FALSE	ZBTB40
chr1.23019244.23019759	ENSG00000004487	0	-0.712819	0.0934389	FALSE	FALSE	TRUE	TRUE	KDM1A
chr1.23343312.23344859	ENSG00000125944	0	0.830991	0.0167292	FALSE	FALSE	TRUE	TRUE	HNRNPR
chr1.23367956.23368599	ENSG00000125945	843	0.541159	0.0597386	TRUE	TRUE	TRUE	TRUE	ZNF436
chr1.23367956.23368599	ENSG00000249087	-398	0.707998	0.0587668	TRUE	TRUE	TRUE	TRUE	ZNF436-AS1
chr1.23368752.23369279	ENSG00000125945	163	0.177697	0.236091	TRUE	TRUE	TRUE	TRUE	ZNF436
chr1.23368752.23369279	ENSG00000249087	0	0.55421	0.125474	TRUE	TRUE	TRUE	TRUE	ZNF436-AS1
chr1.23422409.23422589	ENSG00000204219	2151	0.909356	0.0100932	TRUE	TRUE	TRUE	TRUE	TCEA3
chr1.23424733.23424851	ENSG00000204219	0	0.668284	0.122424	TRUE	TRUE	TRUE	TRUE	TCEA3
chr1.23531303.23531553	ENSG00000007968	-83	0.282461	0.418176	TRUE	TRUE	TRUE	FALSE	E2F2
chr1.23559241.23559754	ENSG00000117318	40	-0.707896	0.253045	TRUE	FALSE	TRUE	TRUE	ID3
chr1.23691613.23692263	ENSG00000142676	0	0.518716	0.17903	FALSE	FALSE	TRUE	TRUE	RPL11
chr1.23742954.23743543	ENSG00000011007	0	-0.378556	0.195198	FALSE	FALSE	TRUE	TRUE	ELOA
chr1.23743800.23744075	ENSG00000011007	645	0.501687	0.144346	FALSE	FALSE	TRUE	TRUE	ELOA
chr1.23778219.23778666	ENSG00000236810	0	0.376797	0.473701	FALSE	FALSE	TRUE	TRUE	ELOA-AS1
chr1.23778219.23778666	ENSG00000057757	0	0.218884	0.209536	FALSE	FALSE	TRUE	TRUE	PITHD1
chr1.23790981.23791233	ENSG00000011009	11	-0.0972554	0.180524	FALSE	FALSE	TRUE	TRUE	LYPLA2
chr1.23800484.23801045	ENSG00000117308	0	-0.730885	0.0596096	TRUE	TRUE	TRUE	TRUE	GALE
chr1.23838551.23838782	ENSG00000117305	0	0.176719	0.475062	FALSE	FALSE	TRUE	TRUE	HMGCL
chr1.23867860.23868549	ENSG00000179163	0	0.254099	0.154987	TRUE	FALSE	TRUE	TRUE	FUCA1
chr1.23958943.23960149	ENSG00000189266	0	0.510491	0.330871	FALSE	FALSE	TRUE	TRUE	PNRC2
chr1.23960395.23960494	ENSG00000189266	1286	0.557213	0.0224417	FALSE	FALSE	TRUE	TRUE	PNRC2
chr1.23979899.23980642	ENSG00000188529	285	-0.471509	0.129097	TRUE	FALSE	TRUE	TRUE	SRSF10
chr1.23980834.23981005	ENSG00000188529	0	0.523205	0.27404	FALSE	FALSE	TRUE	TRUE	SRSF10
chr1.24187202.24187469	ENSG00000185436	490	0.968619	0.0289301	FALSE	FALSE	FALSE	FALSE	IFNLR1
chr1.24413376.24413844	ENSG00000001461	-1950	-0.491772	0.280607	TRUE	TRUE	TRUE	TRUE	NIPAL3
chr1.24415467.24416054	ENSG00000001460	880	-0.595544	0.201623	TRUE	TRUE	TRUE	TRUE	STPG1
chr1.24415467.24416054	ENSG00000001461	0	0.664624	0.102011	TRUE	TRUE	TRUE	TRUE	NIPAL3
chr1.24416928.24417080	ENSG00000001460	0	0.586659	0.113283	FALSE	FALSE	TRUE	TRUE	STPG1
chr1.24416928.24417080	ENSG00000001461	1134	0.283297	0.214174	FALSE	FALSE	TRUE	TRUE	NIPAL3
chr1.24499268.24499499	ENSG00000117602	-2852	-0.908485	0.0100573	TRUE	FALSE	TRUE	TRUE	RCAN3
chr1.24501355.24503692	ENSG00000117602	0	0.959987	0.00743914	TRUE	TRUE	TRUE	TRUE	RCAN3
chr1.24504273.24504500	ENSG00000117602	1922	0.616393	0.0458176	FALSE	FALSE	TRUE	TRUE	RCAN3
chr1.24505088.24505422	ENSG00000117602	2737	0.628811	0.223863	TRUE	TRUE	TRUE	TRUE	RCAN3
chr1.24744834.24746025	ENSG00000169504	0	-0.240193	0.0811787	TRUE	TRUE	TRUE	TRUE	CLIC4
chr1.24963635.24963772	ENSG00000020633	1349	0.315826	0.215028	FALSE	FALSE	FALSE	FALSE	RUNX3
chr1.24964888.24965529	ENSG00000020633	0	-0.409598	0.236248	TRUE	TRUE	FALSE	FALSE	RUNX3
chr1.24966670.24967211	ENSG00000020633	-1549	-0.370058	0.268479	TRUE	TRUE	FALSE	FALSE	RUNX3
chr1.25232285.25232659	ENSG00000117614	0	0.794384	0.128755	TRUE	TRUE	TRUE	TRUE	SYF2
chr1.25232285.25232659	ENSG00000284602	0	0.728906	0.0297833	TRUE	TRUE	FALSE	FALSE
chr1.25233204.25233334	ENSG00000117614	-702	-0.455251	0.102863	TRUE	TRUE	TRUE	TRUE	SYF2
chr1.25233204.25233334	ENSG00000284602	618	-0.657375	0.116277	TRUE	TRUE	FALSE	FALSE
chr1.25267098.25267190	ENSG00000261349	0	0.114885	0.480617	FALSE	FALSE	TRUE	TRUE
chr1.25267468.25268070	ENSG00000261349	-332	0.798465	0.0685963	FALSE	FALSE	TRUE	TRUE
chr1.25337238.25338944	ENSG00000117616	0	0.880373	0.0555426	TRUE	FALSE	TRUE	TRUE	RSRP1
chr1.25337238.25338944	ENSG00000183726	0	-0.389387	0.536877	TRUE	FALSE	FALSE	TRUE	TMEM50A
chr1.25429943.25431395	ENSG00000188672	0	0.940048	0.0452776	TRUE	TRUE	TRUE	TRUE	RHCE
chr1.25429943.25431395	ENSG00000204178	0	0.913549	0.0022952	TRUE	TRUE	TRUE	TRUE	MACO1
chr1.25543490.25543674	ENSG00000157978	0	0.151356	0.117328	TRUE	TRUE	TRUE	TRUE	LDLRAP1
chr1.25616237.25616303	ENSG00000117643	-1165	-0.111659	0.265118	FALSE	FALSE	TRUE	TRUE	MAN1C1
chr1.25616516.25616913	ENSG00000117643	-555	0.747318	0.15924	TRUE	FALSE	TRUE	TRUE	MAN1C1
chr1.25617253.25617425	ENSG00000117643	-43	0.776211	0.189002	FALSE	FALSE	TRUE	TRUE	MAN1C1
chr1.25619156.25619486	ENSG00000117643	1688	0.838872	0.149798	TRUE	FALSE	TRUE	TRUE	MAN1C1
chr1.25819654.25820953	ENSG00000228172	0	0.732625	0.0751544	TRUE	TRUE	TRUE	TRUE
chr1.25819654.25820953	ENSG00000117640	1014	0.214442	0.0674599	TRUE	TRUE	TRUE	TRUE	MTFR1L
chr1.25859355.25859653	ENSG00000127423	0	-0.201996	0.370033	FALSE	FALSE	TRUE	FALSE	AUNIP
chr1.25905060.25905218	ENSG00000117632	1773	-0.397166	0.19076	TRUE	TRUE	TRUE	TRUE	STMN1
chr1.25905437.25906662	ENSG00000117632	329	-0.199163	0.256965	FALSE	FALSE	TRUE	TRUE	STMN1
chr1.25906922.25907088	ENSG00000117632	0	-0.719349	0.0120053	FALSE	FALSE	TRUE	TRUE	STMN1
chr1.25997697.25998678	ENSG00000158006	0	0.748197	0.12466	TRUE	TRUE	TRUE	TRUE	PAFAH2
chr1.26110930.26111935	ENSG00000175087	0	0.35537	0.104778	TRUE	FALSE	FALSE	FALSE	PDIK1L
chr1.26112157.26112282	ENSG00000175087	992	0.279238	0.00789839	TRUE	FALSE	FALSE	FALSE	PDIK1L
chr1.26169704.26169995	ENSG00000236782	1826	0.751705	0.101785	TRUE	TRUE	TRUE	TRUE
chr1.26169704.26169995	ENSG00000142684	0	0.900035	0.0531161	TRUE	TRUE	TRUE	TRUE	ZNF593
chr1.26233837.26234822	ENSG00000130695	0	-0.773083	0.0678648	TRUE	FALSE	TRUE	TRUE	CEP85
chr1.26235002.26235300	ENSG00000130695	849	-0.0868661	0.0348128	FALSE	FALSE	TRUE	TRUE	CEP85
chr1.26276013.26276570	ENSG00000142669	-2606	0.88124	0.0877889	TRUE	FALSE	FALSE	FALSE	SH3BGRL3
chr1.26278899.26279220	ENSG00000142669	0	0.828873	0.0963849	TRUE	TRUE	FALSE	FALSE	SH3BGRL3
chr1.26279419.26280206	ENSG00000142669	243	-0.872476	0.00531431	TRUE	TRUE	FALSE	FALSE	SH3BGRL3
chr1.26317753.26318341	ENSG00000158062	22	0.881383	0.0846383	TRUE	TRUE	TRUE	TRUE	UBXN11
chr1.26317753.26318341	ENSG00000169442	0	0.94284	0.0482721	TRUE	TRUE	TRUE	TRUE	CD52
chr1.26318618.26318977	ENSG00000158062	-255	-0.659902	0.160313	FALSE	FALSE	TRUE	TRUE	UBXN11
chr1.26318618.26318977	ENSG00000169442	661	-0.77662	0.133555	FALSE	FALSE	TRUE	TRUE	CD52
chr1.26319369.26319898	ENSG00000158062	-1006	-0.798717	0.103356	FALSE	FALSE	TRUE	TRUE	UBXN11
chr1.26319369.26319898	ENSG00000169442	1412	-0.981393	0.00828055	FALSE	FALSE	TRUE	TRUE	CD52
chr1.26358899.26359265	ENSG00000176092	787	0.610565	0.239913	TRUE	FALSE	TRUE	TRUE	CRYBG2
chr1.26373372.26373562	ENSG00000176083	960	0.806966	0.0731506	TRUE	FALSE	FALSE	FALSE	ZNF683
chr1.26431932.26432452	ENSG00000117682	0	-0.830455	0.15495	FALSE	FALSE	TRUE	TRUE	DHDDS
chr1.26472016.26473302	ENSG00000198830	0	0.132462	0.104779	TRUE	FALSE	TRUE	TRUE	HMGN2
chr1.26529663.26530034	ENSG00000117676	0	0.690237	0.160789	FALSE	FALSE	TRUE	TRUE	RPS6KA1
chr1.26692265.26692714	ENSG00000117713	-522	-0.202932	0.513874	TRUE	TRUE	FALSE	TRUE	ARID1A
chr1.26692957.26693428	ENSG00000117713	0	0.408922	0.475863	FALSE	FALSE	FALSE	TRUE	ARID1A
chr1.26695284.26698402	ENSG00000117713	2048	-0.455711	0.507669	TRUE	TRUE	FALSE	TRUE	ARID1A
chr1.26786662.26789434	ENSG00000060642	0	0.414633	0.348319	FALSE	FALSE	FALSE	FALSE	PIGV
chr1.26790048.26790342	ENSG00000060642	2576	0.21575	0.0357971	TRUE	TRUE	FALSE	FALSE	PIGV
chr1.26826377.26827000	ENSG00000204160	0	-0.645543	0.0817306	FALSE	FALSE	FALSE	FALSE	ZDHHC18
chr1.26828504.26828735	ENSG00000204160	1794	0.750409	0.0243806	TRUE	TRUE	FALSE	FALSE	ZDHHC18
chr1.26890191.26890619	ENSG00000142751	0	-0.201006	0.159055	FALSE	FALSE	TRUE	TRUE	GPN2
chr1.26900355.26900536	ENSG00000198746	0	0.434643	0.45747	FALSE	FALSE	TRUE	TRUE	GPATCH3
chr1.26900355.26900536	ENSG00000090273	117	-0.921834	0.0201752	FALSE	FALSE	TRUE	TRUE	NUDC
chr1.26960416.26960552	ENSG00000175707	-10	0.938246	0.0375747	TRUE	TRUE	TRUE	TRUE	KDF1
chr1.27234213.27235125	ENSG00000142784	0	0.948431	0.0177589	TRUE	FALSE	TRUE	TRUE	WDTC1
chr1.27235284.27235594	ENSG00000142784	768	-0.153831	0.694533	FALSE	FALSE	TRUE	TRUE	WDTC1
chr1.27321982.27322664	ENSG00000186501	0	-0.428299	0.330278	TRUE	FALSE	TRUE	TRUE	TMEM222
chr1.27321982.27322664	ENSG00000241547	-2665	-0.366294	0.359186	TRUE	FALSE	FALSE	FALSE
chr1.27341592.27342100	ENSG00000142765	0	0.783295	0.188355	FALSE	FALSE	TRUE	TRUE	SYTL1
chr1.27342395.27342774	ENSG00000142765	375	0.0572806	0.422908	FALSE	FALSE	TRUE	TRUE	SYTL1
chr1.27343244.27343700	ENSG00000142765	1224	0.902478	0.0480359	TRUE	TRUE	TRUE	TRUE	SYTL1
chr1.27365339.27365416	ENSG00000142733	1476	-0.49165	0.0291183	FALSE	FALSE	TRUE	TRUE	MAP3K6
chr1.27365575.27366627	ENSG00000142733	265	0.107993	0.0996757	TRUE	TRUE	TRUE	TRUE	MAP3K6
chr1.27366916.27367047	ENSG00000142733	-24	0.335846	0.136948	TRUE	FALSE	TRUE	TRUE	MAP3K6
chr1.27392319.27392723	ENSG00000181773	0	0.637969	0.185769	FALSE	FALSE	TRUE	TRUE	GPR3
chr1.27489189.27489288	ENSG00000158195	870	-0.170044	0.499277	FALSE	FALSE	TRUE	TRUE	WASF2
chr1.27489674.27490687	ENSG00000158195	0	0.616193	0.126882	TRUE	TRUE	TRUE	TRUE	WASF2
chr1.27603699.27604303	ENSG00000126705	128	0.590203	0.196194	TRUE	TRUE	TRUE	TRUE	AHDC1
chr1.27632375.27632746	ENSG00000000938	2531	-0.26848	0.238745	FALSE	FALSE	FALSE	FALSE	FGR
chr1.27632922.27633177	ENSG00000000938	2100	-0.633823	0.0141682	TRUE	FALSE	FALSE	FALSE	FGR
chr1.27637092.27637322	ENSG00000000938	-1815	-0.616068	0.0882827	TRUE	FALSE	FALSE	FALSE	FGR
chr1.27669264.27669386	ENSG00000126709	2832	0.131465	0.491396	FALSE	FALSE	FALSE	FALSE	IFI6
chr1.27672113.27672585	ENSG00000126709	0	-0.603436	0.0944174	TRUE	FALSE	FALSE	FALSE	IFI6
chr1.27725532.27726549	ENSG00000009780	0	0.725066	0.0953271	TRUE	TRUE	TRUE	TRUE	FAM76A
chr1.27772736.27773996	ENSG00000117758	0	-0.330935	0.561395	FALSE	FALSE	TRUE	TRUE	STX12
chr1.27830641.27830921	ENSG00000117751	0	-0.872265	0.058333	FALSE	FALSE	FALSE	FALSE	PPP1R8
chr1.27831182.27831301	ENSG00000117751	404	0.454093	0.221424	FALSE	FALSE	FALSE	FALSE	PPP1R8
chr1.27872390.27872619	ENSG00000130775	0	0.679373	0.0227913	FALSE	FALSE	TRUE	FALSE	THEMIS2
chr1.27872889.27872982	ENSG00000130775	346	0.575852	0.0212506	FALSE	FALSE	TRUE	FALSE	THEMIS2
chr1.27873203.27873562	ENSG00000130775	660	0.867504	0.0821171	FALSE	FALSE	TRUE	FALSE	THEMIS2
chr1.27913949.27915020	ENSG00000117748	0	-0.218087	0.36053	FALSE	FALSE	TRUE	TRUE	RPA2
chr1.27959628.27960283	ENSG00000158156	166	0.47665	0.274547	FALSE	FALSE	TRUE	TRUE	XKR8
chr1.28088328.28089100	ENSG00000158161	0	-0.726152	0.157361	FALSE	FALSE	TRUE	TRUE	EYA3
chr1.28232933.28233144	ENSG00000126698	0	-0.817754	0.0868475	TRUE	TRUE	TRUE	TRUE	DNAJC8
chr1.28232933.28233144	ENSG00000130770	-2965	0.346523	0.253031	TRUE	TRUE	TRUE	FALSE	ATP5IF1
chr1.28235873.28236391	ENSG00000126698	-2848	-0.844996	0.125522	TRUE	TRUE	TRUE	TRUE	DNAJC8
chr1.28235873.28236391	ENSG00000130770	0	0.522362	0.15734	TRUE	TRUE	TRUE	FALSE	ATP5IF1
chr1.28236710.28236849	ENSG00000130770	601	0.249787	0.322726	FALSE	FALSE	TRUE	FALSE	ATP5IF1
chr1.28244162.28244388	ENSG00000270605	-2709	0.571065	0.0922317	TRUE	FALSE	TRUE	FALSE
chr1.28259131.28259938	ENSG00000130766	0	0.784348	0.0697164	TRUE	TRUE	TRUE	TRUE	SESN2
chr1.28328819.28329391	ENSG00000130772	0	-0.67154	0.0908104	TRUE	FALSE	FALSE	FALSE	MED18
chr1.28329606.28329697	ENSG00000130772	604	0.583433	0.300873	FALSE	FALSE	FALSE	FALSE	MED18
chr1.28369420.28370166	ENSG00000204138	0	0.175993	0.0817231	FALSE	FALSE	FALSE	FALSE	PHACTR4
chr1.28505609.28506952	ENSG00000180198	0	0.614872	0.0211579	FALSE	FALSE	TRUE	TRUE	RCC1
chr1.28505609.28506952	ENSG00000242125	0	0.488321	0.169061	FALSE	FALSE	TRUE	TRUE	SNHG3
chr1.28505609.28506952	ENSG00000200087	-1607	0.494125	0.111315	FALSE	FALSE	TRUE	TRUE	SNORA73B
chr1.28507125.28507710	ENSG00000180198	1182	0.975921	0.0101786	TRUE	FALSE	TRUE	TRUE	RCC1
chr1.28507125.28507710	ENSG00000242125	1145	0.850188	0.012925	TRUE	FALSE	TRUE	TRUE	SNHG3
chr1.28507125.28507710	ENSG00000200087	-849	0.847478	0.0963377	TRUE	FALSE	TRUE	TRUE	SNORA73B
chr1.28507958.28508081	ENSG00000180198	2015	0.899005	0.0441662	TRUE	FALSE	TRUE	TRUE	RCC1
chr1.28507958.28508081	ENSG00000242125	1978	0.875211	0.0240766	TRUE	FALSE	TRUE	TRUE	SNHG3
chr1.28507958.28508081	ENSG00000200087	-478	0.849879	0.0266947	TRUE	FALSE	TRUE	TRUE	SNORA73B
chr1.28508999.28509081	ENSG00000200087	440	0.919996	0.0722668	TRUE	TRUE	TRUE	TRUE	SNORA73B
chr1.28509882.28512495	ENSG00000200087	1323	0.895165	0.0503842	TRUE	FALSE	TRUE	TRUE	SNORA73B
chr1.28552355.28553938	ENSG00000180098	0	-0.458554	0.12058	FALSE	FALSE	TRUE	TRUE	TRNAU1AP
chr1.28576981.28577089	ENSG00000221539	1733	0.601429	0.00508697	FALSE	FALSE	TRUE	TRUE	SNORD99
chr1.28577295.28577688	ENSG00000221539	1134	0.464058	0.0892511	TRUE	TRUE	TRUE	TRUE	SNORD99
chr1.28578045.28578138	ENSG00000221539	684	0.493683	0.159723	TRUE	TRUE	TRUE	TRUE	SNORD99
chr1.28581046.28582279	ENSG00000197989	704	0.679295	0.119876	FALSE	FALSE	TRUE	TRUE	SNHG12
chr1.28581046.28582279	ENSG00000221539	-2224	0.421691	0.200554	FALSE	FALSE	TRUE	TRUE	SNORD99
chr1.28582915.28583094	ENSG00000197989	0	-0.167189	0.693496	FALSE	FALSE	TRUE	TRUE	SNHG12
chr1.28642585.28644075	ENSG00000120656	0	-0.688949	0.0744803	TRUE	TRUE	TRUE	TRUE	TAF12
chr1.28668633.28669122	ENSG00000162419	0	-0.309154	0.329076	FALSE	FALSE	TRUE	TRUE	GMEB1
chr1.28669322.28670095	ENSG00000162419	590	-0.949796	0.0448871	FALSE	FALSE	TRUE	TRUE	GMEB1
chr1.28736458.28737307	ENSG00000198492	0	-0.250676	0.28578	TRUE	TRUE	FALSE	FALSE	YTHDF2
chr1.28737684.28737811	ENSG00000198492	1063	0.126731	0.0893975	FALSE	FALSE	FALSE	FALSE	YTHDF2
chr1.28885004.28885376	ENSG00000159023	-1715	0.12324	0.0972148	TRUE	TRUE	TRUE	TRUE	EPB41
chr1.28886750.28887227	ENSG00000159023	0	-0.122651	0.0921694	FALSE	FALSE	TRUE	TRUE	EPB41
chr1.28887598.28887918	ENSG00000159023	507	0.790993	0.0730332	TRUE	TRUE	TRUE	TRUE	EPB41
chr1.29181353.29182215	ENSG00000116350	0	-0.898105	0.0430224	FALSE	FALSE	FALSE	FALSE	SRSF4
chr1.29230799.29231117	ENSG00000116353	0	0.594561	0.00379962	FALSE	FALSE	TRUE	TRUE	MECR
chr1.30717953.30719675	ENSG00000186056	0	0.822847	0.000426513	FALSE	FALSE	TRUE	TRUE	MATN1-AS1
chr1.30754718.30754866	ENSG00000162511	2954	-0.718379	0.0351966	FALSE	FALSE	TRUE	FALSE	LAPTM5
chr1.30756582.30757109	ENSG00000162511	711	0.717723	0.173434	FALSE	FALSE	TRUE	FALSE	LAPTM5
chr1.30757311.30757968	ENSG00000162511	0	0.662943	0.173555	TRUE	FALSE	TRUE	FALSE	LAPTM5
chr1.30759811.30760092	ENSG00000162511	-1991	0.899281	0.0180565	TRUE	FALSE	TRUE	FALSE	LAPTM5
chr1.31064950.31065049	ENSG00000134644	942	0.187729	0.175198	TRUE	TRUE	TRUE	FALSE	PUM1
chr1.31065373.31066157	ENSG00000134644	0	0.342443	0.0543243	FALSE	FALSE	TRUE	FALSE	PUM1
chr1.31296433.31297266	ENSG00000060688	0	-0.234311	0.0381338	TRUE	TRUE	TRUE	TRUE	SNRNP40
chr1.31296433.31297266	ENSG00000121766	0	-0.589296	0.181723	TRUE	TRUE	TRUE	TRUE	ZCCHC17
chr1.31644369.31645391	ENSG00000162517	0	-0.754747	0.0745315	TRUE	TRUE	TRUE	TRUE	PEF1
chr1.31943683.31943811	ENSG00000184007	1045	0.458023	0.0142953	TRUE	TRUE	TRUE	TRUE	PTP4A2
chr1.31943992.31944138	ENSG00000184007	718	0.332034	0.343063	TRUE	FALSE	TRUE	TRUE	PTP4A2
chr1.31944356.31944674	ENSG00000184007	182	-0.324498	0.0714362	FALSE	FALSE	TRUE	TRUE	PTP4A2
chr1.32013331.32014216	ENSG00000121774	0	-0.658832	0.260819	TRUE	FALSE	TRUE	TRUE	KHDRBS1
chr1.32072596.32073591	ENSG00000121775	565	-0.882668	0.0112073	TRUE	FALSE	TRUE	TRUE	TMEM39B
chr1.32107879.32108730	ENSG00000025800	0	-0.948065	0.0294691	TRUE	FALSE	TRUE	TRUE	KPNA6
chr1.32179516.32180212	ENSG00000084652	0	-0.604	0.10961	FALSE	FALSE	TRUE	TRUE	TXLNA
chr1.32180429.32180537	ENSG00000084652	743	0.813202	0.120664	FALSE	FALSE	TRUE	TRUE	TXLNA
chr1.32200266.32200862	ENSG00000160050	0	-0.0885086	0.236458	FALSE	FALSE	TRUE	TRUE	CCDC28B
chr1.32201125.32201723	ENSG00000160050	739	0.305386	0.370631	TRUE	FALSE	TRUE	TRUE	CCDC28B
chr1.32205515.32205744	ENSG00000160051	0	0.622707	0.198537	FALSE	FALSE	TRUE	TRUE	IQCC
chr1.32221943.32222507	ENSG00000160055	0	0.522355	0.284376	TRUE	FALSE	TRUE	TRUE	TMEM234
chr1.32221943.32222507	ENSG00000084623	15	-0.00205691	0.0491481	TRUE	FALSE	TRUE	TRUE	EIF3I
chr1.32240458.32240821	ENSG00000220785	799	0.258413	0.135822	TRUE	FALSE	FALSE	FALSE
chr1.32241086.32241441	ENSG00000220785	179	-0.0310437	0.0306231	FALSE	FALSE	FALSE	FALSE
chr1.32248290.32248437	ENSG00000182866	-2802	0.514018	0.130483	FALSE	FALSE	TRUE	TRUE	LCK
chr1.32248724.32248868	ENSG00000182866	-2371	0.782218	0.119639	TRUE	FALSE	TRUE	TRUE	LCK
chr1.32249046.32249147	ENSG00000182866	-2092	0.0898329	0.457401	FALSE	FALSE	TRUE	TRUE	LCK
chr1.32249740.32251560	ENSG00000182866	0	0.692946	0.0886784	TRUE	TRUE	TRUE	TRUE	LCK
chr1.32253695.32254246	ENSG00000182866	2456	0.967466	0.00772793	TRUE	TRUE	TRUE	TRUE	LCK
chr1.32291764.32292779	ENSG00000116478	0	-0.51559	0.40384	TRUE	TRUE	TRUE	TRUE	HDAC1
chr1.32335200.32335702	ENSG00000175130	677	0.545041	0.17538	TRUE	TRUE	FALSE	FALSE	MARCKSL1
chr1.32336058.32336405	ENSG00000175130	0	-0.0058715	0.378454	TRUE	TRUE	FALSE	FALSE	MARCKSL1
chr1.32337452.32337578	ENSG00000175130	-1073	0.197542	0.432084	TRUE	FALSE	FALSE	FALSE	MARCKSL1
chr1.32351133.32351848	ENSG00000162526	0	0.828482	0.0998402	FALSE	FALSE	TRUE	TRUE	TSSK3
chr1.32393975.32394921	ENSG00000160058	0	0.918181	0.0170071	TRUE	TRUE	TRUE	FALSE	BSDC1
chr1.32650273.32651875	ENSG00000176261	0	-0.876554	0.00910215	TRUE	TRUE	TRUE	TRUE	ZBTB8OS
chr1.32650273.32651875	ENSG00000162521	0	-0.957931	0.0346853	TRUE	TRUE	TRUE	TRUE	RBBP4
chr1.32816863.32818419	ENSG00000134684	0	-0.253592	0.06314	TRUE	FALSE	TRUE	TRUE	YARS1
chr1.32816863.32818419	ENSG00000116497	96	-0.0627513	0.505352	TRUE	FALSE	TRUE	TRUE	S100PBP
chr1.32963845.32963951	ENSG00000116514	734	0.384504	0.197648	FALSE	FALSE	FALSE	FALSE	RNF19B
chr1.32964512.32965087	ENSG00000116514	0	-0.163632	0.0810914	FALSE	FALSE	FALSE	FALSE	RNF19B
chr1.33080940.33081219	ENSG00000004455	0	-0.721836	0.0476101	FALSE	FALSE	TRUE	TRUE	AK2
chr1.33080940.33081219	ENSG00000142920	0	0.698984	0.0907195	FALSE	FALSE	TRUE	TRUE	AZIN2
chr1.33180825.33181077	ENSG00000116525	982	-0.242507	0.677761	TRUE	TRUE	TRUE	TRUE	TRIM62
chr1.33181276.33181620	ENSG00000116525	439	0.278169	0.472364	FALSE	FALSE	TRUE	TRUE	TRIM62
chr1.33181990.33182192	ENSG00000116525	0	0.926861	0.0349354	TRUE	FALSE	TRUE	TRUE	TRIM62
chr1.33255524.33255702	ENSG00000160094	-843	-0.450815	0.198706	TRUE	TRUE	TRUE	TRUE	ZNF362
chr1.33256431.33256919	ENSG00000160094	0	-0.0156737	0.456625	FALSE	FALSE	TRUE	TRUE	ZNF362
chr1.33430956.33431268	ENSG00000134686	0	0.143596	0.261996	TRUE	TRUE	TRUE	TRUE	PHC2
chr1.33472304.33472777	ENSG00000121903	0	0.690063	0.0411393	TRUE	TRUE	TRUE	TRUE	ZSCAN20
chr1.34852737.34852955	ENSG00000230163	2043	0.492418	0.0308025	FALSE	FALSE	FALSE	FALSE
chr1.34859063.34859282	ENSG00000163866	534	0.480863	0.0335001	FALSE	FALSE	TRUE	TRUE	SMIM12
chr1.34859525.34860219	ENSG00000163866	0	0.577356	0.372092	FALSE	FALSE	TRUE	TRUE	SMIM12
chr1.34985052.34985469	ENSG00000241014	0	0.807092	0.0612123	FALSE	FALSE	TRUE	TRUE	LOC653160
chr1.34985052.34985469	ENSG00000243749	0	-0.19081	0.41386	FALSE	FALSE	FALSE	FALSE	TMEM35B
chr1.35031154.35031320	ENSG00000271741	421	-0.842127	0.142539	FALSE	FALSE	FALSE	FALSE
chr1.35031154.35031320	ENSG00000163867	648	-0.92061	0.00150084	FALSE	FALSE	TRUE	TRUE	ZMYM6
chr1.35031627.35032131	ENSG00000271741	0	0.79003	0.0423752	TRUE	TRUE	FALSE	FALSE
chr1.35031627.35032131	ENSG00000163867	0	0.95719	0.0154268	TRUE	TRUE	TRUE	TRUE	ZMYM6
chr1.35191879.35193493	ENSG00000116560	0	-0.409718	0.203402	TRUE	TRUE	TRUE	TRUE	SFPQ
chr1.35268502.35269184	ENSG00000146463	0	0.400849	0.208852	FALSE	FALSE	TRUE	TRUE	ZMYM4
chr1.35557162.35557909	ENSG00000142687	41	0.731345	0.0833655	FALSE	FALSE	TRUE	TRUE	KIAA0319L
chr1.35557162.35557909	ENSG00000020129	0	-0.693643	0.0450629	FALSE	FALSE	TRUE	TRUE	NCDN
chr1.35558405.35558550	ENSG00000142687	-455	-0.392053	0.0497195	FALSE	FALSE	TRUE	TRUE	KIAA0319L
chr1.35558405.35558550	ENSG00000020129	932	0.410581	0.493022	FALSE	FALSE	TRUE	TRUE	NCDN
chr1.35559435.35559583	ENSG00000142687	-1485	-0.14383	0.32894	TRUE	TRUE	TRUE	TRUE	KIAA0319L
chr1.35559435.35559583	ENSG00000020129	1962	-0.392976	0.140084	TRUE	TRUE	TRUE	TRUE	NCDN
chr1.35577737.35577924	ENSG00000239636	-8	0.765201	0.125888	TRUE	TRUE	TRUE	TRUE
chr1.35641265.35641708	ENSG00000126067	136	-0.549903	0.210631	FALSE	FALSE	TRUE	TRUE	PSMB2
chr1.35641960.35642212	ENSG00000126067	-116	0.865882	0.000612729	FALSE	FALSE	TRUE	TRUE	PSMB2
chr1.35718616.35719353	ENSG00000142686	119	0.929439	0.0194517	TRUE	TRUE	TRUE	TRUE	C1orf216
chr1.35769266.35770207	ENSG00000092853	0	0.957645	0.00520323	TRUE	FALSE	TRUE	TRUE	CLSPN
chr1.35930378.35931638	ENSG00000126070	0	-0.0833866	0.291159	TRUE	TRUE	FALSE	FALSE	AGO3
chr1.36088694.36088960	ENSG00000116863	0	-0.290396	0.322633	FALSE	FALSE	TRUE	TRUE	ADPRHL2
chr1.36089281.36089359	ENSG00000116863	406	-0.101341	0.0277913	FALSE	FALSE	TRUE	TRUE	ADPRHL2
chr1.36155567.36156228	ENSG00000054116	0	-0.891903	0.0695449	FALSE	FALSE	TRUE	TRUE	TRAPPC3
chr1.36155567.36156228	ENSG00000116871	0	-0.539381	0.344006	FALSE	FALSE	TRUE	TRUE	MAP7D1
chr1.36156613.36157158	ENSG00000054116	-560	-0.568576	0.0364774	TRUE	FALSE	TRUE	TRUE	TRAPPC3
chr1.36156613.36157158	ENSG00000116871	1034	0.197135	0.344031	TRUE	FALSE	TRUE	TRUE	MAP7D1
chr1.36223403.36224987	ENSG00000054118	0	-0.744755	0.125424	TRUE	FALSE	TRUE	TRUE	THRAP3
chr1.36305079.36305518	ENSG00000214193	-869	0.355363	0.00736977	TRUE	FALSE	TRUE	TRUE	SH3D21
chr1.36306257.36307362	ENSG00000214193	0	-0.134731	0.173612	FALSE	FALSE	TRUE	TRUE	SH3D21
chr1.36384904.36385045	ENSG00000196182	851	-0.798249	0.086746	TRUE	FALSE	TRUE	TRUE	STK40
chr1.36385244.36387152	ENSG00000196182	0	0.910964	0.0143954	TRUE	TRUE	TRUE	TRUE	STK40
chr1.36397263.36398077	ENSG00000181817	0	0.760743	0.0346783	FALSE	FALSE	TRUE	TRUE	LSM10
chr1.36450415.36450654	ENSG00000116885	0	0.659596	0.286297	FALSE	FALSE	TRUE	TRUE	OSCP1
chr1.36464283.36464860	ENSG00000116898	0	-0.423531	0.315332	FALSE	FALSE	TRUE	TRUE	MRPS15
chr1.37473159.37474705	ENSG00000233621	0	-0.514168	0.388853	TRUE	TRUE	FALSE	FALSE	LINC01137
chr1.37473159.37474705	ENSG00000163874	0	0.138909	0.0734088	TRUE	TRUE	TRUE	TRUE	ZC3H12A
chr1.37476913.37477977	ENSG00000233621	-2502	-0.582642	0.179357	TRUE	TRUE	FALSE	FALSE	LINC01137
chr1.37476913.37477977	ENSG00000163874	2361	0.744073	0.160715	TRUE	TRUE	TRUE	TRUE	ZC3H12A
chr1.37513691.37514423	ENSG00000163875	351	0.361108	0.439488	TRUE	TRUE	TRUE	TRUE	MEAF6
chr1.37514670.37515120	ENSG00000163875	0	-0.46528	0.343144	TRUE	FALSE	TRUE	TRUE	MEAF6
chr1.37554238.37554432	ENSG00000163877	0	0.364645	0.37926	FALSE	FALSE	TRUE	TRUE	SNIP1
chr1.37554238.37554432	ENSG00000237749	-1815	0.669839	0.109206	FALSE	FALSE	TRUE	TRUE
chr1.37595637.37596139	ENSG00000134697	0	-0.619172	0.0783682	FALSE	FALSE	TRUE	TRUE	GNL2
chr1.37689751.37690802	ENSG00000116922	1447	0.562309	0.0860234	FALSE	FALSE	TRUE	FALSE	C1orf109
chr1.37689751.37690802	ENSG00000134690	-1616	-0.600911	0.0917902	FALSE	FALSE	TRUE	TRUE	CDCA8
chr1.37692016.37692589	ENSG00000116922	0	-0.647287	0.0224013	FALSE	FALSE	TRUE	FALSE	C1orf109
chr1.37692016.37692589	ENSG00000134690	0	-0.419475	0.239043	FALSE	FALSE	TRUE	TRUE	CDCA8
chr1.37807634.37807873	ENSG00000196449	312	0.906741	0.0496819	TRUE	TRUE	TRUE	TRUE	YRDC
chr1.37807634.37807873	ENSG00000197982	655	0.980388	0.00289337	TRUE	TRUE	TRUE	TRUE	C1orf122
chr1.37808082.37808655	ENSG00000196449	0	0.406097	0.190937	FALSE	FALSE	TRUE	TRUE	YRDC
chr1.37808082.37808655	ENSG00000197982	1103	0.595517	0.118713	FALSE	FALSE	TRUE	TRUE	C1orf122
chr1.37859514.37860373	ENSG00000188786	0	0.541134	0.166667	TRUE	TRUE	TRUE	TRUE	MTF1
chr1.37946978.37947173	ENSG00000204084	0	-0.170849	0.150893	TRUE	TRUE	TRUE	TRUE	INPP5B
chr1.37989606.37989724	ENSG00000183431	1197	0.0577706	0.196275	FALSE	FALSE	TRUE	TRUE	SF3A3
chr1.37989957.37990321	ENSG00000183431	600	-0.353232	0.553228	FALSE	FALSE	TRUE	TRUE	SF3A3
chr1.38009349.38009668	ENSG00000183520	91	0.963009	0.0279047	TRUE	FALSE	TRUE	TRUE	UTP11
chr1.38046769.38047177	ENSG00000185668	0	-0.17431	0.061827	FALSE	FALSE	TRUE	TRUE	POU3F1
chr1.38858825.38860201	ENSG00000116954	0	0.404247	0.346013	TRUE	TRUE	FALSE	FALSE	RRAGC
chr1.38872748.38872866	ENSG00000214114	1239	-0.0830164	0.008099	FALSE	FALSE	TRUE	TRUE	MYCBP
chr1.38873244.38873652	ENSG00000214114	453	-0.59611	0.203814	FALSE	FALSE	TRUE	TRUE	MYCBP
chr1.38990783.38991596	ENSG00000174574	0	0.657631	0.23642	TRUE	TRUE	TRUE	TRUE	AKIRIN1
chr1.39026176.39026923	ENSG00000168653	0	-0.0294985	0.162785	FALSE	FALSE	FALSE	TRUE	NDUFS5
chr1.39491475.39491666	ENSG00000183682	0	0.312929	0.322746	FALSE	FALSE	FALSE	FALSE	BMP8A
chr1.39575229.39575330	ENSG00000090621	1460	-0.895679	0.0732416	TRUE	TRUE	TRUE	FALSE	PABPC4
chr1.39575712.39575842	ENSG00000090621	948	0.1553	0.200113	FALSE	FALSE	TRUE	FALSE	PABPC4
chr1.39576566.39577042	ENSG00000090621	0	-0.647684	0.10979	FALSE	FALSE	TRUE	FALSE	PABPC4
chr1.39691343.39692102	ENSG00000116983	0	0.916065	0.00418474	TRUE	TRUE	TRUE	TRUE	HPCAL4
chr1.39691343.39692102	ENSG00000084072	-80	-0.943715	0.0441635	TRUE	TRUE	FALSE	FALSE	PPIE
chr1.39883213.39883659	ENSG00000043514	0	0.974284	0.014045	TRUE	FALSE	TRUE	FALSE	TRIT1
chr1.39901978.39902485	ENSG00000116990	0	-0.617434	0.0525766	TRUE	TRUE	FALSE	FALSE	MYCL
chr1.39954912.39956170	ENSG00000168389	0	0.943082	0.000845666	TRUE	TRUE	TRUE	TRUE	MFSD2A
chr1.40039356.40041016	ENSG00000131236	0	-0.704336	0.0543533	TRUE	FALSE	TRUE	TRUE	CAP1
chr1.40041242.40041351	ENSG00000131236	1009	0.608079	0.152428	FALSE	FALSE	TRUE	TRUE	CAP1
chr1.40097162.40097536	ENSG00000131238	191	-0.582998	0.228988	FALSE	FALSE	TRUE	TRUE	PPT1
chr1.40161168.40161704	ENSG00000117000	0	0.4855	0.221219	TRUE	FALSE	TRUE	TRUE	RLF
chr1.40162799.40163043	ENSG00000117000	1426	-0.0417875	0.547026	TRUE	TRUE	TRUE	TRUE	RLF
chr1.40257346.40258467	ENSG00000259943	0	0.0308062	0.156156	TRUE	FALSE	TRUE	TRUE
chr1.40257346.40258467	ENSG00000084073	0	0.164093	0.0236732	TRUE	FALSE	TRUE	TRUE	ZMPSTE24
chr1.40315347.40315854	ENSG00000049089	1962	-0.00555829	0.0448424	FALSE	FALSE	TRUE	TRUE	COL9A2
chr1.40316058.40316301	ENSG00000049089	1515	-0.883098	0.0613788	FALSE	FALSE	TRUE	TRUE	COL9A2
chr1.40316594.40316865	ENSG00000049089	951	0.737441	0.217267	FALSE	FALSE	TRUE	TRUE	COL9A2
chr1.40449891.40450718	ENSG00000187801	0	0.703209	0.106481	TRUE	TRUE	FALSE	FALSE	ZFP69B
chr1.40450897.40451513	ENSG00000187801	795	0.717035	0.0667356	TRUE	TRUE	FALSE	FALSE	ZFP69B
chr1.40477189.40477370	ENSG00000187815	0	-0.46889	0.260322	FALSE	FALSE	TRUE	TRUE	ZFP69
chr1.40508575.40508840	ENSG00000164002	0	0.727492	0.0401805	FALSE	FALSE	TRUE	FALSE	EXO5
chr1.40531422.40531861	ENSG00000117010	0	0.0725329	0.398138	FALSE	FALSE	FALSE	FALSE	ZNF684
chr1.40665460.40666062	ENSG00000117016	0	0.143239	0.402014	FALSE	FALSE	TRUE	TRUE	RIMS3
chr1.40691430.40692562	ENSG00000272145	0	-0.148419	0.269929	FALSE	FALSE	TRUE	TRUE
chr1.40691430.40692562	ENSG00000066136	0	0.100958	0.604302	FALSE	FALSE	FALSE	FALSE	NFYC
chr1.40861632.40861777	ENSG00000179862	589	0.494068	0.394806	FALSE	FALSE	TRUE	TRUE	CITED4
chr1.40862243.40862862	ENSG00000179862	0	0.829777	0.113178	TRUE	FALSE	TRUE	TRUE	CITED4
chr1.40979268.40980645	ENSG00000171793	0	-0.232901	0.16594	TRUE	FALSE	TRUE	TRUE	CTPS1
chr1.40980873.40981065	ENSG00000171793	1538	0.871131	0.044142	TRUE	FALSE	TRUE	TRUE	CTPS1
chr1.41241317.41241525	ENSG00000010803	629	0.78499	0.020606	TRUE	TRUE	TRUE	TRUE	SCMH1
chr1.41241975.41242179	ENSG00000010803	0	0.798364	0.0381045	FALSE	FALSE	TRUE	TRUE	SCMH1
chr1.42035415.42036212	ENSG00000127124	0	-0.579637	0.0620354	TRUE	FALSE	TRUE	FALSE	HIVEP3
chr1.42334406.42334509	ENSG00000198815	1368	0.106823	0.00672754	FALSE	FALSE	TRUE	FALSE	FOXJ3
chr1.42334766.42335690	ENSG00000198815	187	0.828989	0.134855	FALSE	FALSE	TRUE	FALSE	FOXJ3
chr1.42380669.42381051	ENSG00000177181	0	0.917616	0.0352212	TRUE	TRUE	FALSE	FALSE	RIMKLA
chr1.42455895.42457057	ENSG00000127125	0	0.498247	0.340608	TRUE	FALSE	TRUE	TRUE	PPCS
chr1.42462974.42463388	ENSG00000186409	0	0.893499	0.0717028	TRUE	TRUE	TRUE	TRUE	CCDC30
chr1.42657942.42658640	ENSG00000171960	0	-0.845461	0.0123291	TRUE	TRUE	TRUE	TRUE	PPIH
chr1.42681384.42683268	ENSG00000065978	0	-0.661232	0.00492877	TRUE	FALSE	TRUE	TRUE	YBX1
chr1.42766004.42766083	ENSG00000117385	1001	0.270128	0.182768	FALSE	FALSE	TRUE	TRUE	P3H1
chr1.42766004.42766083	ENSG00000164008	-1186	-0.0330145	0.2312	FALSE	FALSE	TRUE	TRUE	C1orf50
chr1.42766004.42766083	ENSG00000283580	-1209	0.272281	0.413713	FALSE	FALSE	TRUE	TRUE	C1orf50
chr1.42766482.42767761	ENSG00000117385	0	-0.225704	0.715729	TRUE	TRUE	TRUE	TRUE	P3H1
chr1.42766482.42767761	ENSG00000164008	0	0.639525	0.0799703	TRUE	TRUE	TRUE	TRUE	C1orf50
chr1.42766482.42767761	ENSG00000283580	0	0.916047	0.0246082	TRUE	TRUE	TRUE	TRUE	C1orf50
chr1.42816606.42817544	ENSG00000177868	0	0.79174	0.139913	TRUE	FALSE	FALSE	FALSE	SVBP
chr1.42816606.42817544	ENSG00000164010	0	0.892652	0.0023894	TRUE	FALSE	TRUE	TRUE	ERMAP
chr1.42846337.42846709	ENSG00000164011	0	-0.595558	0.238767	FALSE	FALSE	FALSE	FALSE	ZNF691
chr1.42847794.42848011	ENSG00000164011	1221	0.485605	0.291128	TRUE	TRUE	FALSE	FALSE	ZNF691
chr1.42957890.42959321	ENSG00000117394	0	0.0579283	0.38489	TRUE	TRUE	TRUE	TRUE	SLC2A1
chr1.43358141.43358246	ENSG00000117399	-709	0.774997	0.0681242	FALSE	FALSE	TRUE	TRUE	CDC20
chr1.43358639.43359234	ENSG00000117399	0	0.961873	0.0135145	TRUE	TRUE	TRUE	TRUE	CDC20
chr1.43367117.43368613	ENSG00000066322	0	0.888212	0.0856421	TRUE	TRUE	TRUE	TRUE	ELOVL1
chr1.43389519.43390198	ENSG00000159479	0	0.199437	0.223445	FALSE	FALSE	TRUE	TRUE	MED8
chr1.43389519.43390198	ENSG00000198198	0	-0.385832	0.132873	FALSE	FALSE	TRUE	TRUE	SZT2
chr1.43453563.43454101	ENSG00000178922	0	0.780908	0.180203	FALSE	FALSE	TRUE	TRUE	HYI
chr1.43454469.43454768	ENSG00000178922	-480	-0.481728	0.113083	TRUE	TRUE	TRUE	TRUE	HYI
chr1.43649779.43650747	ENSG00000066135	0	-0.650117	0.232058	FALSE	FALSE	TRUE	TRUE	KDM4A
chr1.43707084.43707889	ENSG00000236200	249	0.236907	0.0898535	TRUE	FALSE	TRUE	TRUE
chr1.43707084.43707889	ENSG00000126091	1260	-0.599071	0.143831	TRUE	FALSE	TRUE	TRUE	ST3GAL3
chr1.43945233.43945480	ENSG00000117408	-1459	0.841718	0.0127736	TRUE	TRUE	TRUE	TRUE	IPO13
chr1.43946298.43947206	ENSG00000117408	0	-0.793041	0.132912	FALSE	FALSE	TRUE	TRUE	IPO13
chr1.43969737.43970267	ENSG00000132768	0	0.80664	0.18329	TRUE	TRUE	TRUE	TRUE	DPH2
chr1.43974500.43975174	ENSG00000117410	13	-0.553449	0.274013	FALSE	FALSE	TRUE	TRUE	ATP6V0B
chr1.43975761.43975910	ENSG00000117410	1274	-0.528838	0.0114016	FALSE	FALSE	TRUE	TRUE	ATP6V0B
chr1.43991448.43992088	ENSG00000159214	89	0.806532	0.0991892	TRUE	FALSE	TRUE	TRUE	CCDC24
chr1.44029691.44031537	ENSG00000196517	0	0.9304	0.0523988	TRUE	TRUE	TRUE	TRUE	SLC6A9
chr1.44213268.44213716	ENSG00000178028	0	-0.512782	0.338338	FALSE	FALSE	FALSE	FALSE	DMAP1
chr1.44355001.44355509	ENSG00000117419	0	-0.0455234	0.28055	FALSE	FALSE	TRUE	TRUE	ERI3
chr1.44674053.44674775	ENSG00000126106	0	-0.0187217	0.0700805	FALSE	FALSE	FALSE	FALSE	TMEM53
chr1.44674053.44674775	ENSG00000198520	0	-0.27171	0.326935	FALSE	FALSE	TRUE	TRUE	ARMH1
chr1.44739574.44739916	ENSG00000142945	0	-0.504276	0.145456	FALSE	FALSE	TRUE	FALSE	KIF2C
chr1.44775389.44776239	ENSG00000225721	0	0.307181	0.0126557	FALSE	FALSE	TRUE	TRUE
chr1.44775389.44776239	ENSG00000142937	138	0.155808	0.646767	FALSE	FALSE	TRUE	TRUE	RPS8
chr1.44775389.44776239	ENSG00000200913	-251	-0.100722	0.259153	FALSE	FALSE	TRUE	TRUE	SNORD46
chr1.44775389.44776239	ENSG00000202031	-1604	0.00692629	0.24695	FALSE	FALSE	FALSE	FALSE	SNORD38A
chr1.44784900.44785066	ENSG00000142959	2639	-0.103196	0.306813	FALSE	FALSE	FALSE	FALSE	BEST4
chr1.44786178.44786584	ENSG00000142959	1121	-0.244363	0.292473	FALSE	FALSE	FALSE	FALSE	BEST4
chr1.44799729.44801115	ENSG00000173846	0	0.126278	0.343484	TRUE	TRUE	TRUE	TRUE	PLK3
chr1.44801533.44802240	ENSG00000173846	1308	0.383298	0.281283	TRUE	FALSE	TRUE	TRUE	PLK3
chr1.44806674.44810117	ENSG00000188396	0	0.425193	0.388307	TRUE	TRUE	TRUE	TRUE	TCTEX1D4
chr1.44806674.44810117	ENSG00000222009	0	0.50873	0.34062	TRUE	TRUE	TRUE	TRUE	BTBD19
chr1.44810293.44810836	ENSG00000222009	1811	0.358107	0.00353691	TRUE	TRUE	TRUE	TRUE	BTBD19
chr1.44986312.44986843	ENSG00000070785	0	0.599899	0.199688	FALSE	FALSE	TRUE	TRUE	EIF2B3
chr1.45010566.45010685	ENSG00000126107	644	0.478025	0.0450409	FALSE	FALSE	TRUE	TRUE	HECTD3
chr1.45010566.45010685	ENSG00000126088	-1462	0.16411	0.447328	FALSE	FALSE	TRUE	TRUE	UROD
chr1.45010892.45011487	ENSG00000126107	0	0.370434	0.414828	FALSE	FALSE	TRUE	TRUE	HECTD3
chr1.45010892.45011487	ENSG00000126088	-660	0.407539	0.0445655	FALSE	FALSE	TRUE	TRUE	UROD
chr1.45011838.45012298	ENSG00000126107	-509	-0.16227	0.0356004	FALSE	FALSE	TRUE	TRUE	HECTD3
chr1.45011838.45012298	ENSG00000126088	0	-0.521077	0.278866	FALSE	FALSE	TRUE	TRUE	UROD
chr1.45012689.45013019	ENSG00000126107	-1360	0.724349	0.135727	TRUE	TRUE	TRUE	TRUE	HECTD3
chr1.45012689.45013019	ENSG00000126088	542	0.707041	0.154064	TRUE	TRUE	TRUE	TRUE	UROD
chr1.45303372.45304397	ENSG00000162415	1812	0.503158	0.143687	FALSE	FALSE	TRUE	TRUE	ZSWIM5
chr1.45306522.45306656	ENSG00000162415	-313	-0.756865	0.186858	TRUE	FALSE	TRUE	TRUE	ZSWIM5
chr1.45326733.45326969	ENSG00000186603	0	0.9813	0.0152449	TRUE	TRUE	TRUE	TRUE	HPDL
chr1.45339490.45340680	ENSG00000132781	0	0.420727	0.0849944	TRUE	FALSE	FALSE	FALSE	MUTYH
chr1.45339490.45340680	ENSG00000132773	0	0.535692	0.196765	TRUE	FALSE	TRUE	TRUE	TOE1
chr1.45340889.45341120	ENSG00000132781	-419	0.296355	0.129537	FALSE	FALSE	FALSE	FALSE	MUTYH
chr1.45340889.45341120	ENSG00000132773	1219	0.31064	0.310513	FALSE	FALSE	TRUE	TRUE	TOE1
chr1.45490708.45491676	ENSG00000070759	0	0.848024	0.0617854	TRUE	TRUE	TRUE	TRUE	TESK2
chr1.45499873.45500396	ENSG00000280670	0	0.589193	0.255906	TRUE	TRUE	FALSE	FALSE	CCDC163
chr1.45499873.45500396	ENSG00000132763	0	-0.752893	0.110903	TRUE	TRUE	TRUE	TRUE	MMACHC
chr1.45521226.45522620	ENSG00000117450	427	0.69329	0.0111041	TRUE	FALSE	TRUE	TRUE	PRDX1
chr1.45550435.45551310	ENSG00000117448	0	-0.776561	0.108154	TRUE	TRUE	TRUE	TRUE	AKR1A1
chr1.45583334.45585179	ENSG00000132780	0	-0.90157	0.0514025	TRUE	TRUE	TRUE	TRUE	NASP
chr1.45586502.45586708	ENSG00000132780	2656	0.767074	0.114518	TRUE	FALSE	TRUE	TRUE	NASP
chr1.45686047.45687714	ENSG00000159592	399	0.299285	0.312116	TRUE	TRUE	TRUE	TRUE	GPBP1L1
chr1.45686047.45687714	ENSG00000159596	0	-0.915892	0.0200258	TRUE	TRUE	TRUE	TRUE	TMEM69
chr1.45688036.45688462	ENSG00000159592	0	-0.7527	0.0055328	FALSE	FALSE	TRUE	TRUE	GPBP1L1
chr1.45688036.45688462	ENSG00000159596	822	-0.0645411	0.71329	FALSE	FALSE	TRUE	TRUE	TMEM69
chr1.45750248.45751098	ENSG00000197429	0	0.394526	0.534445	FALSE	FALSE	TRUE	TRUE	IPP
chr1.46131892.46131991	ENSG00000117461	1045	0.255643	0.0878265	FALSE	FALSE	TRUE	FALSE	PIK3R3
chr1.46132633.46133462	ENSG00000117461	0	0.752441	0.054686	TRUE	FALSE	TRUE	FALSE	PIK3R3
chr1.46246911.46247819	ENSG00000085999	0	0.290328	0.158548	FALSE	FALSE	TRUE	TRUE	RAD54L
chr1.46302132.46302507	ENSG00000132128	1101	0.612879	0.269447	FALSE	FALSE	TRUE	TRUE	LRRC41
chr1.46302132.46302507	ENSG00000173660	-1124	0.893128	0.0454348	FALSE	FALSE	TRUE	TRUE	UQCRH
chr1.46302779.46303903	ENSG00000132128	0	-0.441346	0.0938261	FALSE	FALSE	TRUE	TRUE	LRRC41
chr1.46302779.46303903	ENSG00000173660	0	-0.810097	0.106068	FALSE	FALSE	TRUE	TRUE	UQCRH
chr1.46340063.46340238	ENSG00000117481	0	0.482317	0.0209787	FALSE	FALSE	TRUE	TRUE	NSUN4
chr1.46340582.46341187	ENSG00000117481	405	0.611408	0.255924	FALSE	FALSE	TRUE	TRUE	NSUN4
chr1.46616261.46616561	ENSG00000079277	282	-0.460779	0.244214	TRUE	FALSE	TRUE	TRUE	MKNK1
chr1.46616261.46616561	ENSG00000142961	330	0.488125	0.0469009	TRUE	FALSE	TRUE	TRUE	MOB3C
chr1.46616822.46616990	ENSG00000079277	0	0.168991	0.64749	FALSE	FALSE	TRUE	TRUE	MKNK1
chr1.46616822.46616990	ENSG00000142961	0	-0.326429	0.645574	FALSE	FALSE	TRUE	TRUE	MOB3C
chr1.46675939.46676033	ENSG00000123472	-2072	0.146125	0.145469	TRUE	TRUE	TRUE	TRUE	ATPAF1
chr1.46719045.46719486	ENSG00000159658	0	-0.128733	0.227053	FALSE	FALSE	TRUE	TRUE	EFCAB14
chr1.47314022.47314577	ENSG00000123473	0	-0.060364	0.303309	TRUE	TRUE	TRUE	TRUE	STIL
chr1.47314787.47315001	ENSG00000123473	-640	-0.104672	0.0407686	FALSE	FALSE	TRUE	TRUE	STIL
chr1.47333517.47334797	ENSG00000162368	0	0.396439	0.303767	FALSE	FALSE	TRUE	TRUE	CMPK1
chr1.47436552.47436723	ENSG00000237424	-1911	-0.45979	0.0574218	FALSE	FALSE	FALSE	FALSE	FOXD2-AS1
chr1.47436552.47436723	ENSG00000186564	535	-0.692142	0.0107329	FALSE	FALSE	TRUE	TRUE	FOXD2
chr1.47437201.47438116	ENSG00000237424	-2560	-0.237989	0.314011	FALSE	FALSE	FALSE	FALSE	FOXD2-AS1
chr1.47437201.47438116	ENSG00000186564	1184	-0.140498	0.282407	FALSE	FALSE	TRUE	TRUE	FOXD2
chr1.48471842.48472479	ENSG00000132122	0	0.365336	0.433013	FALSE	FALSE	TRUE	TRUE	SPATA6
chr1.48776799.48777004	ENSG00000162373	0	0.967923	0.0030994	TRUE	FALSE	TRUE	FALSE	BEND5
chr1.50959574.50960461	ENSG00000185104	0	-0.00336438	0.0865332	TRUE	FALSE	TRUE	TRUE	FAF1
chr1.50959574.50960461	ENSG00000123080	-284	0.869468	0.0910354	TRUE	FALSE	TRUE	TRUE	CDKN2C
chr1.51235217.51235325	ENSG00000123091	-946	0.430651	0.350338	FALSE	FALSE	TRUE	TRUE	RNF11
chr1.51235944.51236938	ENSG00000123091	0	0.493416	0.115463	TRUE	FALSE	TRUE	TRUE	RNF11
chr1.51518117.51518287	ENSG00000085832	1041	0.293512	0.16769	FALSE	FALSE	TRUE	TRUE	EPS15
chr1.51518742.51518911	ENSG00000085832	417	0.0405997	0.554838	FALSE	FALSE	TRUE	TRUE	EPS15
chr1.51519162.51519525	ENSG00000085832	0	0.357084	0.603842	FALSE	FALSE	TRUE	TRUE	EPS15
chr1.51878477.51879349	ENSG00000078618	0	-0.606362	0.332084	TRUE	TRUE	TRUE	TRUE	NRDC
chr1.51879539.51879660	ENSG00000078618	-602	-0.155496	0.217042	FALSE	FALSE	TRUE	TRUE	NRDC
chr1.52033299.52033928	ENSG00000198841	0	-0.50273	0.118661	FALSE	FALSE	FALSE	FALSE	KTI12
chr1.52055106.52055509	ENSG00000117862	662	0.400557	0.395196	TRUE	TRUE	FALSE	FALSE	TXNDC12
chr1.52055106.52055509	ENSG00000134717	-616	-0.564404	0.0136487	TRUE	TRUE	TRUE	TRUE	BTF3L4
chr1.52056051.52056950	ENSG00000117862	0	0.28536	0.492317	TRUE	TRUE	FALSE	FALSE	TXNDC12
chr1.52056051.52056950	ENSG00000134717	0	-0.635028	0.222362	TRUE	TRUE	TRUE	TRUE	BTF3L4
chr1.52139842.52140478	ENSG00000157077	-1616	0.348219	0.505975	TRUE	TRUE	TRUE	TRUE	ZFYVE9
chr1.52141918.52142466	ENSG00000157077	0	0.647827	0.290674	FALSE	FALSE	TRUE	TRUE	ZFYVE9
chr1.52142643.52142766	ENSG00000157077	549	0.453171	0.257018	FALSE	FALSE	TRUE	TRUE	ZFYVE9
chr1.52365646.52366765	ENSG00000154222	0	0.262185	0.267277	TRUE	TRUE	TRUE	TRUE	CC2D1B
chr1.52403722.52405018	ENSG00000085840	0	0.383744	0.355932	FALSE	FALSE	TRUE	TRUE	ORC1
chr1.52403722.52405018	ENSG00000134748	0	-0.545433	0.119268	FALSE	FALSE	TRUE	TRUE	PRPF38A
chr1.52551562.52551688	ENSG00000134744	1799	-0.338413	0.0237554	FALSE	FALSE	TRUE	TRUE	TUT4
chr1.52552203.52552475	ENSG00000134744	1012	0.813187	0.0193711	TRUE	TRUE	TRUE	TRUE	TUT4
chr1.52552640.52553733	ENSG00000134744	0	0.830553	0.0793047	FALSE	FALSE	TRUE	TRUE	TUT4
chr1.52602302.52602647	ENSG00000116157	0	-0.558977	0.199025	TRUE	TRUE	TRUE	TRUE	GPX7
chr1.52633013.52633790	ENSG00000182183	0	0.973535	0.0220407	TRUE	FALSE	TRUE	TRUE	SHISAL2A
chr1.52698117.52698509	ENSG00000162377	0	0.815979	0.0234576	TRUE	FALSE	TRUE	TRUE	COA7
chr1.52726280.52726729	ENSG00000162378	0	0.845955	0.0122673	TRUE	TRUE	TRUE	TRUE	ZYG11B
chr1.52921483.52921906	ENSG00000230953	1061	0.216404	0.0941851	FALSE	FALSE	FALSE	TRUE
chr1.52927193.52927395	ENSG00000121310	0	0.850163	0.0722997	FALSE	FALSE	TRUE	TRUE	ECHDC2
chr1.52927193.52927395	ENSG00000116171	0	-0.0191286	0.00903182	FALSE	FALSE	TRUE	TRUE	SCP2
chr1.53196634.53197259	ENSG00000157184	205	0.343875	0.0663054	TRUE	FALSE	TRUE	TRUE	CPT2
chr1.53220155.53220962	ENSG00000162384	0	-0.408555	0.156896	FALSE	FALSE	TRUE	TRUE	CZIB
chr1.53238453.53238772	ENSG00000162385	0	0.152543	0.288087	FALSE	FALSE	TRUE	TRUE	MAGOH
chr1.53325834.53327555	ENSG00000157193	515	0.985868	0.00873043	TRUE	FALSE	TRUE	TRUE	LRP8
chr1.53328009.53328473	ENSG00000157193	0	0.914188	0.0394275	FALSE	FALSE	TRUE	TRUE	LRP8
chr1.53837315.53837553	ENSG00000058804	1307	0.954894	0.00165418	FALSE	FALSE	TRUE	TRUE	NDC1
chr1.53838000.53838767	ENSG00000058804	93	-0.866861	0.0703576	FALSE	FALSE	TRUE	TRUE	NDC1
chr1.53889572.53890329	ENSG00000058799	0	0.358216	0.494016	TRUE	FALSE	TRUE	TRUE	YIPF1
chr1.53945324.53946779	ENSG00000081870	0	-0.478947	0.236759	TRUE	TRUE	TRUE	TRUE	HSPB11
chr1.53945324.53946779	ENSG00000116212	0	-0.934434	0.0598441	TRUE	TRUE	TRUE	TRUE	LRRC42
chr1.54052723.54054074	ENSG00000116209	0	0.886549	0.0234193	TRUE	FALSE	TRUE	TRUE	TMEM59
chr1.54052723.54054074	ENSG00000116205	0	-0.187745	0.584183	TRUE	FALSE	TRUE	TRUE	TCEANC2
chr1.54199738.54200456	ENSG00000215883	0	-0.534479	0.139785	FALSE	FALSE	TRUE	TRUE	CYB5RL
chr1.54284995.54285491	ENSG00000225632	0	0.913779	0.0620921	TRUE	TRUE	TRUE	TRUE
chr1.54287292.54287560	ENSG00000225632	1887	0.491272	0.263545	FALSE	FALSE	TRUE	TRUE
chr1.54715476.54716591	ENSG00000243725	0	0.942422	0.0180571	FALSE	FALSE	TRUE	TRUE	TTC4
chr1.54764400.54765105	ENSG00000162396	0	-0.899243	0.0562963	TRUE	TRUE	TRUE	TRUE	PARS2
chr1.54800874.54801020	ENSG00000006555	247	-0.453843	0.324348	FALSE	FALSE	TRUE	TRUE	TTC22
chr1.54801251.54801698	ENSG00000006555	0	-0.0701785	0.579563	TRUE	TRUE	TRUE	TRUE	TTC22
chr1.54886746.54887631	ENSG00000116133	0	0.986754	0.00130679	TRUE	TRUE	TRUE	TRUE	DHCR24
chr1.55213839.55213950	ENSG00000162402	1163	-0.562156	0.133766	FALSE	FALSE	FALSE	FALSE	USP24
chr1.55214900.55215705	ENSG00000162402	0	0.209215	0.308654	TRUE	FALSE	FALSE	FALSE	USP24
chr1.55217545.55217796	ENSG00000162402	-2432	-0.0614104	0.0691728	TRUE	TRUE	FALSE	FALSE	USP24
chr1.58545933.58546996	ENSG00000162600	0	-0.0911803	0.257417	FALSE	FALSE	TRUE	TRUE	OMA1
chr1.58699973.58700259	ENSG00000162601	0	-0.376847	0.157573	FALSE	FALSE	TRUE	TRUE	MYSM1
chr1.58781846.58781953	ENSG00000177606	2374	0.270179	0.345922	TRUE	TRUE	TRUE	TRUE	JUN
chr1.58782336.58782628	ENSG00000177606	1699	0.13795	0.159514	FALSE	FALSE	TRUE	TRUE	JUN
chr1.58782336.58782628	ENSG00000234807	-2532	0.117685	0.109811	FALSE	FALSE	TRUE	TRUE
chr1.58782882.58785341	ENSG00000177606	0	0.95182	0.00943478	TRUE	TRUE	TRUE	TRUE	JUN
chr1.58782882.58785341	ENSG00000234807	0	0.96408	0.00365034	TRUE	TRUE	TRUE	TRUE
chr1.59296359.59297275	ENSG00000172456	0	0.950669	0.0174095	FALSE	FALSE	FALSE	FALSE	FGGY
chr1.59814277.59815233	ENSG00000134709	0	0.0464963	0.00198744	TRUE	TRUE	TRUE	TRUE	HOOK1
chr1.59926767.59926876	ENSG00000134716	0	0.683432	0.0666734	FALSE	FALSE	TRUE	TRUE	CYP2J2
chr1.61725046.61725667	ENSG00000162604	0	-0.085089	0.582999	TRUE	FALSE	FALSE	FALSE	TM2D1
chr1.61742296.61742738	ENSG00000132849	0	0.859898	0.108967	TRUE	TRUE	TRUE	TRUE	PATJ
chr1.62435975.62437666	ENSG00000162607	0	-0.468429	0.145838	TRUE	TRUE	TRUE	TRUE	USP1
chr1.62688109.62688284	ENSG00000116641	84	0.788213	0.0456609	FALSE	FALSE	TRUE	TRUE	DOCK7
chr1.62783676.62784250	ENSG00000125703	0	-0.154912	0.482627	FALSE	FALSE	TRUE	TRUE	ATG4C
chr1.63367242.63368062	ENSG00000088035	0	0.569364	0.407859	TRUE	TRUE	TRUE	TRUE	ALG6
chr1.63522905.63523595	ENSG00000203965	0	0.10948	0.336871	FALSE	FALSE	TRUE	TRUE	EFCAB7
chr1.63593141.63594642	ENSG00000142856	0	0.361858	0.234679	FALSE	FALSE	TRUE	TRUE	ITGB3BP
chr1.63593141.63594642	ENSG00000079739	0	0.660055	0.0737589	FALSE	FALSE	TRUE	TRUE	PGM1
chr1.64469992.64470634	ENSG00000158966	-158	-0.521858	0.100916	FALSE	FALSE	TRUE	TRUE	CACHD1
chr1.64744536.64745264	ENSG00000162437	0	-0.422469	0.533125	FALSE	FALSE	TRUE	TRUE	RAVER2
chr1.64963513.64963596	ENSG00000162434	2908	-0.623809	0.0946041	FALSE	FALSE	TRUE	TRUE	JAK1
chr1.64964335.64964444	ENSG00000162434	2060	-0.665761	0.283552	FALSE	FALSE	TRUE	TRUE	JAK1
chr1.64965250.64965362	ENSG00000162434	1142	0.467589	0.193207	FALSE	FALSE	TRUE	TRUE	JAK1
chr1.64965909.64966996	ENSG00000162434	0	0.945945	0.052938	TRUE	FALSE	TRUE	TRUE	JAK1
chr1.65419701.65421080	ENSG00000213625	0	0.0125884	0.118409	FALSE	FALSE	FALSE	FALSE	LEPROT
chr1.65419701.65421080	ENSG00000116678	0	0.56098	0.240557	FALSE	FALSE	TRUE	TRUE	LEPR
chr1.66924488.66925776	ENSG00000152763	0	0.781647	0.0377568	TRUE	TRUE	FALSE	FALSE	WDR78
chr1.66924488.66925776	ENSG00000198160	0	-0.173199	0.354498	TRUE	TRUE	TRUE	TRUE	MIER1
chr1.67053375.67054666	ENSG00000116704	0	0.378706	0.410543	FALSE	FALSE	FALSE	FALSE	SLC35D1
chr1.67304070.67304410	ENSG00000081985	-2954	0.921853	0.040855	TRUE	TRUE	TRUE	TRUE	IL12RB2
chr1.67307146.67307977	ENSG00000081985	0	0.985058	0.0106205	TRUE	FALSE	TRUE	TRUE	IL12RB2
chr1.67308188.67308303	ENSG00000081985	824	0.786893	0.132604	FALSE	FALSE	TRUE	TRUE	IL12RB2
chr1.67429029.67431362	ENSG00000142864	0	0.611645	0.146196	FALSE	FALSE	TRUE	TRUE	SERBP1
chr1.67682663.67682853	ENSG00000116717	-2208	0.50072	0.215316	TRUE	FALSE	TRUE	TRUE	GADD45A
chr1.67683846.67686957	ENSG00000116717	0	0.522276	0.249304	TRUE	TRUE	TRUE	TRUE	GADD45A
chr1.70205319.70205984	ENSG00000066557	0	-0.53153	0.00450957	FALSE	FALSE	TRUE	TRUE	LRRC40
chr1.70205319.70205984	ENSG00000116754	0	0.616336	0.34393	FALSE	FALSE	TRUE	TRUE	SRSF11
chr1.70354012.70355140	ENSG00000118454	0	0.0222448	0.624576	FALSE	FALSE	TRUE	TRUE	ANKRD13C
chr1.70354012.70355140	ENSG00000197568	0	-0.608523	0.0394278	FALSE	FALSE	FALSE	FALSE	HHLA3
chr1.70410581.70411349	ENSG00000116761	0	0.79151	0.123039	FALSE	FALSE	TRUE	TRUE	CTH
chr1.70411556.70411655	ENSG00000116761	338	0.319833	0.204983	FALSE	FALSE	TRUE	TRUE	CTH
chr1.71080547.71080688	ENSG00000132485	609	0.642823	0.2062	TRUE	TRUE	TRUE	TRUE	ZRANB2
chr1.71080954.71081470	ENSG00000132485	0	-0.314384	0.107933	FALSE	FALSE	TRUE	TRUE	ZRANB2
chr1.74197406.74197505	ENSG00000254685	-707	0.560034	0.105085	FALSE	FALSE	FALSE	FALSE	FPGT
chr1.74197406.74197505	ENSG00000259030	-730	-0.676991	0.00515514	FALSE	FALSE	TRUE	TRUE	FPGT-TNNI3K
chr1.74197664.74198543	ENSG00000254685	0	-0.31644	0.167018	FALSE	FALSE	FALSE	FALSE	FPGT
chr1.74197664.74198543	ENSG00000259030	0	0.00658356	0.667207	FALSE	FALSE	TRUE	TRUE	FPGT-TNNI3K
chr1.74732795.74733485	ENSG00000116791	0	0.797314	0.0466374	TRUE	FALSE	FALSE	FALSE	CRYZ
chr1.74732795.74733485	ENSG00000162623	0	0.704786	0.091559	TRUE	FALSE	TRUE	TRUE	TYW3
chr1.74733773.74733977	ENSG00000116791	-365	-0.455209	0.0243708	FALSE	FALSE	FALSE	FALSE	CRYZ
chr1.74733773.74733977	ENSG00000162623	621	-0.0361993	0.527936	FALSE	FALSE	TRUE	TRUE	TYW3
chr1.75724239.75725035	ENSG00000117054	0	0.575185	0.179403	FALSE	FALSE	TRUE	TRUE	ACADM
chr1.75784744.75784843	ENSG00000137955	-1354	-0.85388	0.0347166	FALSE	FALSE	TRUE	TRUE	RABGGTB
chr1.75785034.75785121	ENSG00000137955	-1076	0.459935	0.456306	FALSE	FALSE	TRUE	TRUE	RABGGTB
chr1.75785677.75786807	ENSG00000137955	0	0.828376	0.0822087	FALSE	FALSE	TRUE	TRUE	RABGGTB
chr1.76074475.76074988	ENSG00000184005	0	0.667754	0.000394658	FALSE	FALSE	FALSE	FALSE	ST6GALNAC3
chr1.77219152.77219557	ENSG00000142892	0	-0.473043	0.343592	FALSE	FALSE	TRUE	TRUE	PIGK
chr1.77280069.77280195	ENSG00000154027	-1856	0.919864	0.045283	TRUE	TRUE	TRUE	TRUE	AK5
chr1.77281691.77282563	ENSG00000154027	0	-0.144056	0.592129	FALSE	FALSE	TRUE	TRUE	AK5
chr1.77282893.77283058	ENSG00000154027	842	0.0536301	0.0875991	FALSE	FALSE	TRUE	TRUE	AK5
chr1.77682133.77683897	ENSG00000036549	0	-0.195514	0.133544	FALSE	FALSE	FALSE	FALSE	ZZZ3
chr1.77759076.77760026	ENSG00000077254	0	0.600446	0.111443	FALSE	FALSE	TRUE	TRUE	USP33
chr1.77779478.77779900	ENSG00000180488	0	0.391314	0.0945188	FALSE	FALSE	TRUE	TRUE	MIGA1
chr1.77978171.77979652	ENSG00000162613	0	-0.74847	0.0298749	TRUE	TRUE	TRUE	TRUE	FUBP1
chr1.77978171.77979652	ENSG00000162616	0	0.670824	0.233849	TRUE	TRUE	TRUE	TRUE	DNAJB4
chr1.77979886.77980175	ENSG00000162613	-776	0.362575	0.524521	FALSE	FALSE	TRUE	TRUE	FUBP1
chr1.77979886.77980175	ENSG00000162616	711	-0.478135	0.0608891	FALSE	FALSE	TRUE	TRUE	DNAJB4
chr1.78003398.78003578	ENSG00000273338	976	-0.273279	0.336381	FALSE	FALSE	TRUE	TRUE
chr1.78004057.78004560	ENSG00000273338	0	-0.265084	0.556699	TRUE	TRUE	TRUE	TRUE
chr1.78004718.78005018	ENSG00000273338	-164	0.511925	0.453781	TRUE	TRUE	TRUE	TRUE
chr1.78620190.78620499	ENSG00000137959	268	0.609343	0.0922198	FALSE	FALSE	TRUE	TRUE	IFI44L
chr1.78649684.78649918	ENSG00000137965	0	-0.692779	0.115918	FALSE	FALSE	FALSE	FALSE	IFI44
chr1.78651360.78651513	ENSG00000137965	1564	-0.120137	0.103943	FALSE	FALSE	FALSE	FALSE	IFI44
chr1.84077451.84078502	ENSG00000271576	0	0.107728	0.254862	TRUE	TRUE	TRUE	TRUE
chr1.84077451.84078502	ENSG00000142875	0	-0.717905	0.190815	TRUE	TRUE	TRUE	TRUE	PRKACB
chr1.84479166.84479681	ENSG00000117133	0	-0.580066	0.156632	FALSE	FALSE	TRUE	TRUE	RPF1
chr1.84505648.84506939	ENSG00000174021	0	-0.476663	0.0533216	FALSE	FALSE	TRUE	TRUE	GNG5
chr1.84573082.84573357	ENSG00000117151	1123	-0.880892	0.0603632	TRUE	FALSE	TRUE	TRUE	CTBS
chr1.84573908.84574831	ENSG00000117151	0	0.476406	0.308736	TRUE	TRUE	TRUE	TRUE	CTBS
chr1.84689831.84690954	ENSG00000117155	0	0.101241	0.394671	TRUE	TRUE	TRUE	TRUE	SSX2IP
chr1.84996003.84996448	ENSG00000153898	665	0.786289	0.0756322	TRUE	TRUE	FALSE	FALSE	MCOLN2
chr1.84997053.84997254	ENSG00000153898	0	0.618583	0.274337	FALSE	FALSE	FALSE	FALSE	MCOLN2
chr1.84998986.84999311	ENSG00000153898	-1873	0.674617	0.095026	FALSE	FALSE	FALSE	FALSE	MCOLN2
chr1.85200377.85202230	ENSG00000097096	0	0.414765	0.199361	TRUE	FALSE	FALSE	FALSE	SYDE2
chr1.85259390.85259889	ENSG00000162642	0	0.179752	0.00765802	FALSE	FALSE	TRUE	TRUE	C1orf52
chr1.85275520.85277081	ENSG00000142867	9	0.273797	0.0019391	FALSE	FALSE	TRUE	TRUE	BCL10
chr1.85278951.85279152	ENSG00000142867	-1861	-0.131925	0.340754	TRUE	FALSE	TRUE	TRUE	BCL10
chr1.85707921.85708682	ENSG00000117174	0	0.812016	0.0565807	TRUE	TRUE	TRUE	TRUE	ZNHIT6
chr1.86395766.86396750	ENSG00000122417	0	0.831532	0.0949895	FALSE	FALSE	TRUE	TRUE	ODF2L
chr1.86703942.86705435	ENSG00000097033	0	0.0488828	0.182813	FALSE	FALSE	FALSE	FALSE	SH3GLB1
chr1.86913486.86913648	ENSG00000183291	776	0.843314	0.0510472	FALSE	FALSE	TRUE	TRUE	SELENOF
chr1.86913486.86913648	ENSG00000153936	-1000	-0.0918497	0.402394	FALSE	FALSE	TRUE	TRUE	HS2ST1
chr1.86913862.86915804	ENSG00000183291	0	-0.397526	0.0323568	TRUE	TRUE	TRUE	TRUE	SELENOF
chr1.86913862.86915804	ENSG00000153936	0	-0.488872	0.380805	TRUE	TRUE	TRUE	TRUE	HS2ST1
chr1.87328244.87329026	ENSG00000143013	0	-0.179188	0.214289	FALSE	FALSE	FALSE	FALSE	LMO4
chr1.87329370.87329565	ENSG00000143013	902	-0.159319	0.00730877	FALSE	FALSE	FALSE	FALSE	LMO4
chr1.87331314.87331825	ENSG00000143013	2846	0.7067	0.131524	TRUE	TRUE	FALSE	FALSE	LMO4
chr1.88683544.88685084	ENSG00000065243	0	0.957481	0.00253071	TRUE	TRUE	TRUE	TRUE	PKN2
chr1.88890906.88891010	ENSG00000137947	934	-0.0518503	0.674687	FALSE	FALSE	TRUE	TRUE	GTF2B
chr1.88891267.88891784	ENSG00000137947	160	0.260021	0.669452	TRUE	FALSE	TRUE	TRUE	GTF2B
chr1.88991520.88991650	ENSG00000137944	1303	-0.369833	0.349574	FALSE	FALSE	FALSE	FALSE	KYAT3
chr1.88991520.88991650	ENSG00000213516	1310	0.723579	0.029993	FALSE	FALSE	FALSE	TRUE	RBMXL1
chr1.88991977.88993368	ENSG00000137944	0	0.899415	0.00577025	TRUE	TRUE	FALSE	FALSE	KYAT3
chr1.88991977.88993368	ENSG00000213516	0	-0.294438	0.0470352	TRUE	TRUE	FALSE	TRUE	RBMXL1
chr1.88993736.88993874	ENSG00000137944	-783	-0.540985	0.313951	TRUE	FALSE	FALSE	FALSE	KYAT3
chr1.88993736.88993874	ENSG00000213516	-776	0.461465	0.182409	TRUE	FALSE	FALSE	TRUE	RBMXL1
chr1.89022154.89022283	ENSG00000117226	611	0.324707	0.340425	FALSE	FALSE	TRUE	TRUE	GBP3
chr1.89022732.89022976	ENSG00000117226	0	0.439448	0.0770927	FALSE	FALSE	TRUE	TRUE	GBP3
chr1.89064874.89064972	ENSG00000117228	388	-0.287536	0.583057	FALSE	FALSE	TRUE	TRUE	GBP1
chr1.89065193.89065446	ENSG00000117228	0	0.418419	0.177981	TRUE	FALSE	TRUE	TRUE	GBP1
chr1.89104305.89104478	ENSG00000234518	289	0.878537	0.0988882	FALSE	FALSE	TRUE	TRUE
chr1.89105996.89106095	ENSG00000234518	-1229	0.854375	0.076501	TRUE	TRUE	TRUE	TRUE
chr1.89198321.89199094	ENSG00000162654	0	0.322677	0.0838365	FALSE	FALSE	TRUE	TRUE	GBP4
chr1.89198321.89199094	ENSG00000284734	0	0.736803	0.208684	FALSE	FALSE	TRUE	TRUE
chr1.89199681.89199903	ENSG00000162654	-749	0.876384	0.0436108	FALSE	FALSE	TRUE	TRUE	GBP4
chr1.89199681.89199903	ENSG00000284734	967	-0.135014	0.0777907	FALSE	FALSE	TRUE	TRUE
chr1.89200698.89200960	ENSG00000162654	-1766	0.115913	0.56217	TRUE	TRUE	TRUE	TRUE	GBP4
chr1.89200698.89200960	ENSG00000284734	1984	0.838459	0.0603216	TRUE	TRUE	TRUE	TRUE
chr1.89271724.89271924	ENSG00000154451	880	0.654509	0.163718	TRUE	TRUE	TRUE	TRUE	GBP5
chr1.89272226.89273190	ENSG00000154451	0	0.798248	0.170941	TRUE	TRUE	TRUE	TRUE	GBP5
chr1.89274115.89274887	ENSG00000154451	-1311	0.885301	0.0318543	TRUE	TRUE	TRUE	TRUE	GBP5
chr1.89363285.89363505	ENSG00000183347	-553	0.924359	0.0326696	TRUE	FALSE	FALSE	FALSE	GBP6
chr1.89523502.89523690	ENSG00000197147	-1146	0.661391	0.114621	TRUE	FALSE	TRUE	TRUE	LRRC8B
chr1.89523990.89525726	ENSG00000197147	0	0.573585	0.0382691	TRUE	FALSE	TRUE	TRUE	LRRC8B
chr1.89632255.89632329	ENSG00000231999	565	0.603347	0.212447	FALSE	FALSE	TRUE	TRUE	LRRC8C-DT
chr1.89632255.89632329	ENSG00000171488	-743	-0.0159681	0.00688365	FALSE	FALSE	TRUE	TRUE	LRRC8C
chr1.89632570.89634126	ENSG00000231999	0	0.724599	0.0964924	TRUE	FALSE	TRUE	TRUE	LRRC8C-DT
chr1.89632570.89634126	ENSG00000171488	0	-0.248954	0.173711	TRUE	FALSE	TRUE	TRUE	LRRC8C
chr1.89634347.89634569	ENSG00000231999	-1453	0.525652	0.194474	TRUE	FALSE	TRUE	TRUE	LRRC8C-DT
chr1.89634347.89634569	ENSG00000171488	1275	0.924365	0.0612228	TRUE	FALSE	TRUE	TRUE	LRRC8C
chr1.89820679.89821939	ENSG00000272931	0	0.861333	0.0988743	FALSE	FALSE	FALSE	FALSE
chr1.89820679.89821939	ENSG00000171492	0	-0.716209	0.058668	FALSE	FALSE	TRUE	TRUE	LRRC8D
chr1.89994686.89995787	ENSG00000162664	0	0.138299	0.686065	FALSE	FALSE	TRUE	TRUE	ZNF326
chr1.91021317.91022473	ENSG00000122482	0	-0.278782	0.669102	FALSE	FALSE	TRUE	TRUE	ZNF644
chr1.91500545.91501579	ENSG00000097046	0	0.371616	0.464255	FALSE	FALSE	TRUE	TRUE	CDC7
chr1.92080183.92080902	ENSG00000189195	0	0.900249	0.0611579	TRUE	FALSE	TRUE	TRUE	KIAA1107
chr1.92298496.92299299	ENSG00000174842	0	-0.505045	0.0295177	FALSE	FALSE	TRUE	TRUE	GLMN
chr1.92298496.92299299	ENSG00000122484	0	-0.191826	0.28051	FALSE	FALSE	TRUE	TRUE	RPAP2
chr1.92483254.92487148	ENSG00000162676	0	0.939719	0.0153736	TRUE	FALSE	TRUE	TRUE	GFI1
chr1.92831819.92832522	ENSG00000122406	0	0.0920794	0.80839	FALSE	FALSE	TRUE	TRUE	RPL5
chr1.92960449.92962814	ENSG00000154511	0	0.686303	0.0449664	TRUE	TRUE	TRUE	TRUE	DIPK1A
chr1.93079021.93079378	ENSG00000143033	0	0.577637	0.0404634	FALSE	FALSE	FALSE	FALSE	MTF2
chr1.93080512.93080721	ENSG00000143033	1277	-0.138743	0.610615	TRUE	TRUE	FALSE	FALSE	MTF2
chr1.93179239.93179382	ENSG00000117500	1346	0.0952449	0.570012	FALSE	FALSE	TRUE	TRUE	TMED5
chr1.93179239.93179382	ENSG00000122483	-537	-0.411786	0.0427023	FALSE	FALSE	FALSE	FALSE	CCDC18
chr1.93179552.93181520	ENSG00000117500	0	0.261287	0.128809	TRUE	TRUE	TRUE	TRUE	TMED5
chr1.93179552.93181520	ENSG00000122483	0	-0.919561	0.0632538	TRUE	TRUE	FALSE	FALSE	CCDC18
chr1.93345552.93346731	ENSG00000223745	0	0.828873	0.0568319	TRUE	FALSE	TRUE	FALSE
chr1.93345552.93346731	ENSG00000117505	0	-0.715642	0.128019	TRUE	FALSE	TRUE	TRUE	DR1
chr1.93447943.93448185	ENSG00000137942	0	-0.132329	0.109673	FALSE	FALSE	FALSE	FALSE	FNBP1L
chr1.93844391.93844538	ENSG00000137936	2612	0.375088	0.414063	FALSE	FALSE	FALSE	FALSE	BCAR3
chr1.93844391.93844538	ENSG00000260464	-2636	0.703306	0.0308647	FALSE	FALSE	TRUE	FALSE
chr1.93845834.93848158	ENSG00000137936	0	0.311441	0.435174	TRUE	FALSE	FALSE	FALSE	BCAR3
chr1.93845834.93848158	ENSG00000260464	0	0.802327	0.164848	TRUE	FALSE	TRUE	FALSE
chr1.93878497.93879366	ENSG00000067334	552	0.187154	0.2235	FALSE	FALSE	TRUE	TRUE	DNTTIP2
chr1.93908712.93910098	ENSG00000023909	0	0.806892	0.0686365	TRUE	FALSE	TRUE	TRUE	GCLM
chr1.94417908.94418907	ENSG00000117528	0	-0.556986	0.249005	FALSE	FALSE	TRUE	TRUE	ABCD3
chr1.94541689.94542064	ENSG00000117525	0	0.579879	0.0363567	TRUE	FALSE	TRUE	FALSE	F3
chr1.94927011.94927380	ENSG00000117519	0	0.292047	0.313754	FALSE	FALSE	FALSE	FALSE	CNN3
chr1.95072548.95073389	ENSG00000172339	0	-0.894578	0.0123845	FALSE	FALSE	TRUE	TRUE	ALG14
chr1.95116816.95116969	ENSG00000271092	-954	0.125003	0.520622	FALSE	FALSE	FALSE	FALSE	TLCD4-RWDD3
chr1.95117523.95117734	ENSG00000271092	-189	-0.121969	0.437905	FALSE	FALSE	FALSE	FALSE	TLCD4-RWDD3
chr1.95233787.95234747	ENSG00000122481	0	0.660696	0.0761581	FALSE	FALSE	TRUE	TRUE	RWDD3
chr1.96721422.96722659	ENSG00000117569	0	-0.313438	0.406629	FALSE	FALSE	TRUE	TRUE	PTBP2
chr1.97920489.97921637	ENSG00000188641	0	0.905963	0.00165959	FALSE	FALSE	TRUE	FALSE	DPYD
chr1.99849899.99850522	ENSG00000162688	0	0.343002	0.185258	FALSE	FALSE	TRUE	TRUE	AGL
chr1.99969674.99970561	ENSG00000117620	323	-0.571788	0.313217	FALSE	FALSE	TRUE	TRUE	SLC35A3
chr1.99969674.99970561	ENSG00000283761	0	0.317279	0.51734	FALSE	FALSE	FALSE	FALSE
chr1.100037740.100039249	ENSG00000156875	0	0.602722	0.110089	FALSE	FALSE	FALSE	FALSE	MFSD14A
chr1.100132532.100133443	ENSG00000156876	0	-0.520017	0.00531436	FALSE	FALSE	TRUE	TRUE	SASS6
chr1.100132532.100133443	ENSG00000122435	0	-0.0653609	0.055012	FALSE	FALSE	TRUE	TRUE	TRMT13
chr1.100249525.100250232	ENSG00000137992	0	-0.0137523	0.550963	FALSE	FALSE	TRUE	TRUE	DBT
chr1.100266023.100266551	ENSG00000137996	0	-0.681346	0.0426194	FALSE	FALSE	TRUE	TRUE	RTCA
chr1.100266732.100266825	ENSG00000137996	525	0.379042	0.39816	FALSE	FALSE	TRUE	TRUE	RTCA
chr1.100391830.100392010	ENSG00000234332	2016	0.726056	0.0531291	TRUE	FALSE	TRUE	TRUE
chr1.100394439.100394667	ENSG00000234332	-413	0.777076	0.0580423	TRUE	TRUE	TRUE	TRUE
chr1.100396777.100396894	ENSG00000234332	-2751	-0.787763	0.115342	FALSE	FALSE	TRUE	TRUE
chr1.100894601.100896964	ENSG00000162694	0	0.113186	0.45291	FALSE	FALSE	TRUE	TRUE	EXTL2
chr1.100894601.100896964	ENSG00000162695	0	0.416268	0.0971476	FALSE	FALSE	TRUE	TRUE	SLC30A7
chr1.100898099.100898390	ENSG00000162694	-2101	0.598223	0.148654	TRUE	FALSE	TRUE	TRUE	EXTL2
chr1.100898099.100898390	ENSG00000162695	2023	0.120971	0.105716	TRUE	FALSE	TRUE	TRUE	SLC30A7
chr1.101025277.101026288	ENSG00000117543	0	-0.0120108	0.0539371	FALSE	FALSE	TRUE	TRUE	DPH5
chr1.101025277.101026288	ENSG00000233184	0	0.839408	0.0480189	FALSE	FALSE	TRUE	TRUE	LOC102606465
chr1.101235149.101237616	ENSG00000225938	0	0.0768979	0.509676	TRUE	TRUE	TRUE	TRUE
chr1.101235149.101237616	ENSG00000170989	0	0.193976	0.466971	TRUE	TRUE	TRUE	TRUE	S1PR1
chr1.101237771.101238511	ENSG00000225938	-1243	0.381754	0.390741	TRUE	TRUE	TRUE	TRUE
chr1.101237771.101238511	ENSG00000170989	883	0.594408	0.338716	TRUE	TRUE	TRUE	TRUE	S1PR1
chr1.101238741.101239918	ENSG00000225938	-2213	0.403634	0.257353	TRUE	TRUE	TRUE	TRUE
chr1.101238741.101239918	ENSG00000170989	1853	0.555168	0.197011	TRUE	TRUE	TRUE	TRUE	S1PR1
chr1.103525457.103526539	ENSG00000185946	0	0.153451	0.0379846	FALSE	FALSE	FALSE	FALSE	RNPC3
chr1.107056519.107057616	ENSG00000198890	0	0.977675	0.0136263	FALSE	FALSE	TRUE	TRUE	PRMT6
chr1.107963528.107964091	ENSG00000134215	1053	0.0748251	0.903744	TRUE	TRUE	TRUE	TRUE	VAV3
chr1.107965041.107965234	ENSG00000134215	0	0.192575	0.682776	FALSE	FALSE	TRUE	TRUE	VAV3
chr1.107965587.107965729	ENSG00000134215	-443	-0.0616894	0.543932	FALSE	FALSE	TRUE	TRUE	VAV3
chr1.108200156.108200503	ENSG00000085491	346	0.567364	0.169898	TRUE	FALSE	FALSE	FALSE	SLC25A24
chr1.108200866.108201050	ENSG00000085491	-17	-0.366829	0.0711851	FALSE	FALSE	FALSE	FALSE	SLC25A24
chr1.108559761.108560404	ENSG00000162636	0	0.644972	0.238693	FALSE	FALSE	TRUE	TRUE	FAM102B
chr1.108561038.108561225	ENSG00000162636	949	-0.843646	0.105908	FALSE	FALSE	TRUE	TRUE	FAM102B
chr1.108561806.108562019	ENSG00000162636	1717	0.511253	0.223014	TRUE	TRUE	TRUE	TRUE	FAM102B
chr1.108660785.108661616	ENSG00000162639	0	0.17233	0.192298	TRUE	TRUE	FALSE	FALSE	HENMT1
chr1.108691937.108693690	ENSG00000134186	0	0.72603	0.058193	TRUE	TRUE	FALSE	FALSE	PRPF38B
chr1.108746379.108747180	ENSG00000116266	0	0.317554	0.456207	TRUE	TRUE	TRUE	TRUE	STXBP3
chr1.108747390.108747530	ENSG00000116266	716	-0.442704	0.169871	FALSE	FALSE	TRUE	TRUE	STXBP3
chr1.108876806.108877266	ENSG00000121957	1456	0.143332	0.1577	FALSE	FALSE	TRUE	TRUE	GPSM2
chr1.108962766.108963834	ENSG00000121940	0	-0.859335	0.068033	TRUE	FALSE	FALSE	FALSE	CLCC1
chr1.109041374.109041530	ENSG00000085433	583	0.00255975	0.0690222	FALSE	FALSE	TRUE	TRUE	WDR47
chr1.109041730.109042348	ENSG00000085433	0	0.149274	0.18057	TRUE	FALSE	TRUE	TRUE	WDR47
chr1.109075917.109076144	ENSG00000197780	0	-0.44532	0.0345339	FALSE	FALSE	TRUE	TRUE	TAF13
chr1.109090393.109091269	ENSG00000215717	590	-0.00758014	0.186943	FALSE	FALSE	TRUE	TRUE	TMEM167B
chr1.109091942.109092041	ENSG00000215717	2139	-0.682082	0.202102	TRUE	TRUE	TRUE	TRUE	TMEM167B
chr1.109099939.109100988	ENSG00000270066	0	0.875017	0.0152679	FALSE	FALSE	FALSE	FALSE
chr1.109112758.109113148	ENSG00000116299	-531	0.462104	0.483412	FALSE	FALSE	TRUE	TRUE	KIAA1324
chr1.109113605.109114238	ENSG00000116299	0	-0.131446	0.659761	TRUE	FALSE	TRUE	TRUE	KIAA1324
chr1.109213693.109214610	ENSG00000031698	0	-0.421356	0.0673948	TRUE	TRUE	TRUE	TRUE	SARS1
chr1.109214877.109215110	ENSG00000031698	959	0.335411	0.348277	TRUE	TRUE	TRUE	TRUE	SARS1
chr1.109249458.109249621	ENSG00000143126	-398	0.711507	0.225863	FALSE	FALSE	TRUE	TRUE	CELSR2
chr1.109397937.109398090	ENSG00000134243	0	-0.777499	0.157769	TRUE	TRUE	FALSE	FALSE	SORT1
chr1.109425459.109426918	ENSG00000143106	0	-0.621958	0.102317	TRUE	TRUE	TRUE	TRUE	PSMA5
chr1.109427167.109427250	ENSG00000143106	-740	0.619911	0.207156	FALSE	FALSE	TRUE	TRUE	PSMA5
chr1.109482855.109484310	ENSG00000162650	0	-0.865715	0.0961467	TRUE	FALSE	TRUE	TRUE	ATXN7L2
chr1.109493897.109494567	ENSG00000174151	0	0.571764	0.048077	TRUE	FALSE	FALSE	FALSE	CYB561D1
chr1.109509661.109509848	ENSG00000181754	0	0.943414	0.00363444	TRUE	FALSE	TRUE	TRUE	AMIGO1
chr1.109546372.109546558	ENSG00000065135	-2053	-0.246496	0.0928217	FALSE	FALSE	TRUE	TRUE	GNAI3
chr1.109548399.109548728	ENSG00000065135	0	-0.55985	0.19967	TRUE	FALSE	TRUE	TRUE	GNAI3
chr1.109548922.109549072	ENSG00000065135	311	0.269464	0.367096	FALSE	FALSE	TRUE	TRUE	GNAI3
chr1.109617471.109617571	ENSG00000116337	1367	0.801746	0.0795193	TRUE	FALSE	FALSE	FALSE	AMPD2
chr1.109655981.109656130	ENSG00000168765	0	0.488909	0.0276835	TRUE	TRUE	FALSE	FALSE	GSTM4
chr1.109667861.109668164	ENSG00000213366	0	0.540513	0.250969	TRUE	TRUE	TRUE	FALSE	GSTM2
chr1.109740132.109740486	ENSG00000134202	552	-0.0846669	0.350993	FALSE	FALSE	FALSE	FALSE	GSTM3
chr1.109910485.109910895	ENSG00000184371	243	0.932263	0.00377856	TRUE	TRUE	TRUE	TRUE	CSF1
chr1.109984501.109984868	ENSG00000168710	0	-0.836879	0.114215	TRUE	TRUE	TRUE	TRUE	AHCYL1
chr1.109985620.109985840	ENSG00000168710	934	0.724195	0.00335758	TRUE	FALSE	TRUE	TRUE	AHCYL1
chr1.110034341.110034714	ENSG00000143093	2764	0.679671	0.0286723	FALSE	FALSE	TRUE	TRUE	STRIP1
chr1.110209896.110211328	ENSG00000116396	-15	-0.36791	0.415256	TRUE	TRUE	FALSE	FALSE	KCNC4
chr1.110211616.110211715	ENSG00000116396	273	-0.0277754	0.0755415	TRUE	TRUE	FALSE	FALSE	KCNC4
chr1.110337756.110340084	ENSG00000162775	0	-0.216851	0.00774343	TRUE	TRUE	TRUE	TRUE	RBM15
chr1.110370948.110371130	ENSG00000273373	794	-0.326293	0.599417	TRUE	FALSE	TRUE	TRUE
chr1.110407591.110407873	ENSG00000134248	69	-0.612139	0.175418	FALSE	FALSE	TRUE	TRUE	LAMTOR5
chr1.110630836.110631785	ENSG00000177301	0	0.43882	0.24247	TRUE	FALSE	FALSE	FALSE	KCNA2
chr1.110634459.110635184	ENSG00000177301	-2985	-0.946624	0.0230483	TRUE	FALSE	FALSE	FALSE	KCNA2
chr1.110672072.110672975	ENSG00000177272	2058	0.395242	0.0579936	TRUE	TRUE	TRUE	TRUE	KCNA3
chr1.110673911.110674010	ENSG00000177272	1023	0.715775	0.0473811	FALSE	FALSE	TRUE	TRUE	KCNA3
chr1.110674307.110674484	ENSG00000177272	549	0.817832	0.173659	FALSE	FALSE	TRUE	TRUE	KCNA3
chr1.110674757.110675095	ENSG00000177272	0	0.779878	0.0840683	FALSE	FALSE	TRUE	TRUE	KCNA3
chr1.110872874.110873343	ENSG00000143119	0	-0.0484117	0.0457503	TRUE	TRUE	TRUE	TRUE	CD53
chr1.110873686.110874113	ENSG00000143119	532	-0.241792	0.0447515	FALSE	FALSE	TRUE	TRUE	CD53
chr1.110874516.110874738	ENSG00000143119	1362	-0.417149	0.179711	TRUE	TRUE	TRUE	TRUE	CD53
chr1.110874976.110875684	ENSG00000143119	1822	-0.662307	0.221897	FALSE	FALSE	TRUE	TRUE	CD53
chr1.110963202.110963616	ENSG00000121931	463	0.619579	0.10076	FALSE	FALSE	TRUE	TRUE	LRIF1
chr1.110963202.110963616	ENSG00000273010	0	0.909228	0.081852	FALSE	FALSE	TRUE	TRUE
chr1.110963788.110964323	ENSG00000121931	0	0.343916	0.0872037	FALSE	FALSE	TRUE	TRUE	LRIF1
chr1.110963788.110964323	ENSG00000273010	486	0.770245	0.148411	FALSE	FALSE	TRUE	TRUE
chr1.111139318.111139432	ENSG00000156171	784	0.729357	0.135178	FALSE	FALSE	TRUE	TRUE	DRAM2
chr1.111139318.111139432	ENSG00000134255	-195	0.446911	0.295805	FALSE	FALSE	TRUE	TRUE	CEPT1
chr1.111139664.111140706	ENSG00000156171	0	0.361533	0.237449	FALSE	FALSE	TRUE	TRUE	DRAM2
chr1.111139664.111140706	ENSG00000134255	37	0.328471	0.0998372	FALSE	FALSE	TRUE	TRUE	CEPT1
chr1.111197659.111197846	ENSG00000064886	-2925	0.720451	0.0285384	FALSE	FALSE	TRUE	TRUE	CHI3L2
chr1.111199378.111199705	ENSG00000064886	-1066	0.742192	0.0571427	FALSE	FALSE	TRUE	TRUE	CHI3L2
chr1.111199864.111200806	ENSG00000064886	0	0.0418936	0.354675	FALSE	FALSE	TRUE	TRUE	CHI3L2
chr1.111201829.111201942	ENSG00000162777	2593	0.0361573	0.775009	TRUE	TRUE	TRUE	TRUE	DENND2D
chr1.111201829.111201942	ENSG00000064886	1058	0.890295	0.0710165	TRUE	TRUE	TRUE	TRUE	CHI3L2
chr1.111203635.111204719	ENSG00000162777	0	-0.00815597	0.957201	TRUE	TRUE	TRUE	TRUE	DENND2D
chr1.111203635.111204719	ENSG00000064886	2864	0.827311	0.0155946	TRUE	TRUE	TRUE	TRUE	CHI3L2
chr1.111448481.111449735	ENSG00000116455	0	-0.608633	0.123825	FALSE	FALSE	TRUE	TRUE	WDR77
chr1.111448481.111449735	ENSG00000116459	0	-0.773506	0.152828	FALSE	FALSE	TRUE	TRUE	ATP5PB
chr1.111471033.111471353	ENSG00000143110	-2439	0.987971	0.00148581	TRUE	TRUE	TRUE	TRUE	C1orf162
chr1.111475839.111475977	ENSG00000143110	2047	-0.900586	0.0433774	TRUE	FALSE	TRUE	TRUE	C1orf162
chr1.111476776.111477201	ENSG00000143110	2984	0.895717	0.0691174	TRUE	TRUE	TRUE	TRUE	C1orf162
chr1.111755276.111756384	ENSG00000197852	0	0.881884	0.00444585	TRUE	FALSE	FALSE	FALSE	INKA2
chr1.111755276.111756384	ENSG00000064703	31	-0.588195	0.216503	TRUE	FALSE	TRUE	TRUE	DDX20
chr1.112396070.112396261	ENSG00000143079	0	0.454708	0.279897	FALSE	FALSE	FALSE	FALSE	CTTNBP2NL
chr1.112466202.112466387	ENSG00000134245	-154	-0.855579	0.0245557	TRUE	FALSE	FALSE	FALSE	WNT2B
chr1.112617852.112619361	ENSG00000007341	1464	0.916272	0.0664263	TRUE	FALSE	TRUE	TRUE	ST7L
chr1.112617852.112619361	ENSG00000116489	0	-0.252263	0.287541	TRUE	FALSE	TRUE	TRUE	CAPZA1
chr1.112619556.112620448	ENSG00000007341	377	0.793049	0.0213569	TRUE	FALSE	TRUE	TRUE	ST7L
chr1.112619556.112620448	ENSG00000116489	383	-0.278444	0.378304	TRUE	FALSE	TRUE	TRUE	CAPZA1
chr1.112673744.112673851	ENSG00000155363	603	0.807693	0.0295387	FALSE	FALSE	TRUE	FALSE	MOV10
chr1.112674504.112674942	ENSG00000155363	1363	0.775948	0.0834828	TRUE	TRUE	TRUE	FALSE	MOV10
chr1.112675152.112675293	ENSG00000155363	2011	0.774143	0.0726598	FALSE	FALSE	TRUE	FALSE	MOV10
chr1.112704500.112704608	ENSG00000155366	2826	-0.542928	0.383199	TRUE	FALSE	FALSE	FALSE	RHOC
chr1.112705200.112705326	ENSG00000155366	2108	-0.593374	0.254657	FALSE	FALSE	FALSE	FALSE	RHOC
chr1.112707068.112707558	ENSG00000155366	0	-0.745556	0.188309	TRUE	FALSE	FALSE	FALSE	RHOC
chr1.112955301.112957097	ENSG00000155380	0	0.811395	0.11567	FALSE	FALSE	TRUE	TRUE	SLC16A1
chr1.112955301.112957097	ENSG00000226419	0	0.55634	0.291001	FALSE	FALSE	TRUE	FALSE	SLC16A1-AS1
chr1.112957456.112957753	ENSG00000155380	-443	0.962236	0.00695919	TRUE	FALSE	TRUE	TRUE	SLC16A1
chr1.112957456.112957753	ENSG00000226419	1041	0.914386	0.0325654	TRUE	FALSE	TRUE	FALSE	SLC16A1-AS1
chr1.113072637.113073684	ENSG00000198799	0	0.566601	0.318359	FALSE	FALSE	TRUE	TRUE	LRIG2
chr1.113389940.113390608	ENSG00000081026	-141	0.0238601	0.487748	TRUE	FALSE	TRUE	TRUE	MAGI3
chr1.113390969.113391346	ENSG00000081026	220	-0.122094	0.169509	FALSE	FALSE	TRUE	TRUE	MAGI3
chr1.113391820.113391958	ENSG00000081026	1071	0.550585	0.377924	TRUE	TRUE	TRUE	TRUE	MAGI3
chr1.113758912.113759220	ENSG00000116793	269	0.381781	0.238603	FALSE	FALSE	FALSE	FALSE	PHTF1
chr1.113759422.113759647	ENSG00000116793	0	0.431351	0.0571606	FALSE	FALSE	FALSE	FALSE	PHTF1
chr1.113811449.113812706	ENSG00000081019	0	0.974314	0.0130782	TRUE	TRUE	TRUE	TRUE	RSBN1
chr1.113870929.113871026	ENSG00000134242	733	-0.0512923	0.290102	FALSE	FALSE	TRUE	TRUE	PTPN22
chr1.113871601.113871912	ENSG00000134242	0	-0.0960518	0.0152271	TRUE	TRUE	TRUE	TRUE	PTPN22
chr1.113872287.113872799	ENSG00000134242	-528	0.0537884	0.108653	FALSE	FALSE	TRUE	TRUE	PTPN22
chr1.113874396.113874665	ENSG00000134242	-2637	0.844346	0.0205975	TRUE	TRUE	TRUE	TRUE	PTPN22
chr1.113904378.113905770	ENSG00000134262	0	-0.714719	0.16406	TRUE	FALSE	FALSE	FALSE	AP4B1
chr1.113904378.113905770	ENSG00000118655	0	0.938679	0.0215318	TRUE	FALSE	TRUE	TRUE	DCLRE1B
chr1.113929052.113931147	ENSG00000235527	0	0.919404	0.0299749	TRUE	FALSE	TRUE	TRUE	HIPK1-AS1
chr1.113929052.113931147	ENSG00000163349	0	0.711817	0.238884	TRUE	FALSE	TRUE	TRUE	HIPK1
chr1.113931349.113931927	ENSG00000235527	-1857	0.923972	0.0316164	TRUE	TRUE	TRUE	TRUE	HIPK1-AS1
chr1.113931349.113931927	ENSG00000163349	2157	0.71656	0.201686	TRUE	TRUE	TRUE	TRUE	HIPK1
chr1.114510268.114512049	ENSG00000197323	0	0.868911	0.0577556	TRUE	FALSE	TRUE	TRUE	TRIM33
chr1.114512242.114512323	ENSG00000197323	-1082	-0.344487	0.0787816	FALSE	FALSE	TRUE	TRUE	TRIM33
chr1.114581340.114581892	ENSG00000116752	0	0.317557	0.549137	FALSE	FALSE	TRUE	TRUE	BCAS2
chr1.114669674.114670659	ENSG00000175984	0	0.466862	0.434371	FALSE	FALSE	TRUE	TRUE	DENND2C
chr1.114716337.114716496	ENSG00000213281	398	0.122225	0.375131	FALSE	FALSE	TRUE	TRUE	NRAS
chr1.114716690.114716964	ENSG00000213281	0	-0.110909	0.142397	FALSE	FALSE	TRUE	TRUE	NRAS
chr1.114756023.114756591	ENSG00000009307	2085	-0.67773	0.159661	TRUE	TRUE	FALSE	FALSE	CSDE1
chr1.114757278.114757733	ENSG00000009307	943	-0.14888	0.285929	FALSE	FALSE	FALSE	FALSE	CSDE1
chr1.114757891.114758253	ENSG00000009307	423	0.50643	0.307886	TRUE	TRUE	FALSE	FALSE	CSDE1
chr1.114780405.114780874	ENSG00000052723	0	0.0803982	0.133253	FALSE	FALSE	TRUE	TRUE	SIKE1
chr1.115089411.115089583	ENSG00000134198	0	0.857069	0.0680536	FALSE	FALSE	TRUE	TRUE	TSPAN2
chr1.116372679.116374271	ENSG00000163399	11	-0.709419	0.0669512	TRUE	FALSE	TRUE	FALSE	ATP1A1
chr1.116374951.116375082	ENSG00000163399	2283	-0.846886	0.0180023	TRUE	TRUE	TRUE	FALSE	ATP1A1
chr1.116418492.116418865	ENSG00000203865	0	0.749926	0.117127	FALSE	FALSE	TRUE	TRUE	ATP1A1-AS1
chr1.116569892.116570049	ENSG00000116815	990	-0.170218	0.179303	FALSE	FALSE	FALSE	FALSE	CD58
chr1.116570337.116570625	ENSG00000116815	414	-0.0626903	0.372304	FALSE	FALSE	FALSE	FALSE	CD58
chr1.116570795.116571221	ENSG00000116815	0	-0.936732	0.00901213	FALSE	FALSE	FALSE	FALSE	CD58
chr1.116754055.116754524	ENSG00000116824	0	-0.0691809	0.335415	FALSE	FALSE	TRUE	FALSE	CD2
chr1.116755044.116755584	ENSG00000116824	659	0.805763	0.107576	TRUE	TRUE	TRUE	FALSE	CD2
chr1.116755820.116756360	ENSG00000116824	1435	0.672176	0.239617	FALSE	FALSE	TRUE	FALSE	CD2
chr1.116756715.116757564	ENSG00000116824	2330	0.834839	0.111417	FALSE	FALSE	TRUE	FALSE	CD2
chr1.116772656.116772891	ENSG00000225079	2732	0.11385	0.771064	TRUE	FALSE	FALSE	FALSE
chr1.116777845.116778148	ENSG00000225079	-2222	0.00818531	0.748792	TRUE	FALSE	FALSE	FALSE
chr1.117001495.117001884	ENSG00000134256	0	-0.712922	0.156669	TRUE	TRUE	FALSE	FALSE	CD101
chr1.117059379.117060930	ENSG00000116830	0	-0.823997	0.0104015	TRUE	TRUE	TRUE	TRUE	TTF2
chr1.117061977.117062336	ENSG00000116830	1674	0.857656	0.0371054	TRUE	FALSE	TRUE	TRUE	TTF2
chr1.117366572.117367503	ENSG00000198162	0	0.886799	0.00172683	TRUE	FALSE	TRUE	TRUE	MAN1A2
chr1.117367739.117367896	ENSG00000198162	290	0.777555	0.103119	FALSE	FALSE	TRUE	TRUE	MAN1A2
chr1.117368868.117368976	ENSG00000198162	1419	-0.919952	0.0111995	TRUE	FALSE	TRUE	TRUE	MAN1A2
chr1.117605457.117607151	ENSG00000183508	0	0.970464	0.0107417	TRUE	TRUE	TRUE	TRUE	TENT5C
chr1.117607552.117607755	ENSG00000183508	1618	0.858816	0.0582394	TRUE	FALSE	TRUE	TRUE	TENT5C
chr1.117929153.117930058	ENSG00000196505	0	0.663031	0.0129009	FALSE	FALSE	TRUE	TRUE	GDAP2
chr1.117929153.117930058	ENSG00000065183	0	0.56519	0.144747	FALSE	FALSE	TRUE	FALSE	WDR3
chr1.119139518.119139775	ENSG00000116874	896	0.780039	0.21679	FALSE	FALSE	TRUE	TRUE	WARS2
chr1.119139518.119139775	ENSG00000231365	-621	0.00880327	0.203605	FALSE	FALSE	TRUE	TRUE	WARS2-AS1
chr1.119139966.119140851	ENSG00000116874	0	-0.6635	0.119716	TRUE	FALSE	TRUE	TRUE	WARS2
chr1.119139966.119140851	ENSG00000231365	0	0.481759	0.0895518	TRUE	FALSE	TRUE	TRUE	WARS2-AS1
chr1.119141074.119141228	ENSG00000116874	-403	0.703436	0.201444	FALSE	FALSE	TRUE	TRUE	WARS2
chr1.119141074.119141228	ENSG00000231365	678	-0.512193	0.187217	FALSE	FALSE	TRUE	TRUE	WARS2-AS1
chr1.119648076.119648182	ENSG00000143067	-303	0.351498	0.194945	TRUE	TRUE	TRUE	TRUE	ZNF697
chr1.119648076.119648182	ENSG00000092621	-229	0.801168	0.0483238	TRUE	TRUE	TRUE	TRUE	PHGDH
chr1.119648359.119648510	ENSG00000143067	-586	0.370756	0.205909	TRUE	TRUE	TRUE	TRUE	ZNF697
chr1.119648359.119648510	ENSG00000092621	0	0.63862	0.102307	TRUE	TRUE	TRUE	TRUE	PHGDH
chr1.120068653.120070101	ENSG00000134250	0	-0.0411148	0.535844	FALSE	FALSE	TRUE	TRUE	NOTCH2
chr1.120176348.120176672	ENSG00000265808	0	-0.808136	0.106885	FALSE	FALSE	TRUE	TRUE	SEC22B
chr1.120340446.120342506	ENSG00000223804	0	0.801007	0.0133638	FALSE	FALSE	TRUE	TRUE
chr1.120342712.120343133	ENSG00000223804	-841	0.658818	0.0521231	TRUE	TRUE	TRUE	TRUE
chr1.120723479.120724931	ENSG00000273136	0	0.741727	0.171498	FALSE	FALSE	TRUE	FALSE	NBPF26
chr1.120912072.120912439	ENSG00000281741	1799	0.662878	0.0732387	TRUE	TRUE	TRUE	FALSE
chr1.120912072.120912439	ENSG00000226067	-836	0.71896	0.114859	TRUE	TRUE	TRUE	TRUE
chr1.120912665.120912975	ENSG00000281741	1263	0.580581	0.0356063	FALSE	FALSE	TRUE	FALSE
chr1.120912665.120912975	ENSG00000226067	-300	0.547118	0.184429	FALSE	FALSE	TRUE	TRUE
chr1.120913482.120913628	ENSG00000281741	610	0.801849	0.0569826	FALSE	FALSE	TRUE	FALSE
chr1.120913482.120913628	ENSG00000226067	207	0.780539	0.0415782	FALSE	FALSE	TRUE	TRUE
chr1.120914026.120914718	ENSG00000281741	0	0.851656	0.0125369	FALSE	FALSE	TRUE	FALSE
chr1.120914026.120914718	ENSG00000226067	751	0.865684	0.0500351	FALSE	FALSE	TRUE	TRUE
chr1.121184247.121185784	ENSG00000188610	0	-0.468696	0.0961379	FALSE	FALSE	TRUE	TRUE	FAM72B
chr1.121184247.121185784	ENSG00000171943	0	-0.0492006	0.667772	FALSE	FALSE	TRUE	TRUE	SRGAP2C
chr1.121516450.121516896	ENSG00000231752	-2216	0.871792	0.0422109	TRUE	TRUE	TRUE	TRUE	EMBP1
chr1.121519000.121519830	ENSG00000231752	0	0.817837	0.0175166	FALSE	FALSE	TRUE	TRUE	EMBP1
chr1.143728904.143730025	ENSG00000206737	0	-0.356023	0.383544	FALSE	FALSE	FALSE	FALSE	RNVU1-18
chr1.143971899.143973440	ENSG00000263513	0	-0.501011	0.280257	FALSE	FALSE	TRUE	FALSE	FAM72C
chr1.143971899.143973440	ENSG00000270872	-1647	-0.221172	0.733476	FALSE	FALSE	FALSE	FALSE
chr1.144460760.144460973	ENSG00000266338	701	-0.279664	0.0718173	FALSE	FALSE	TRUE	TRUE	NBPF15
chr1.144461234.144462013	ENSG00000266338	0	0.447127	0.0450419	FALSE	FALSE	TRUE	TRUE	NBPF15
chr1.145094548.145096091	ENSG00000196369	0	-0.070236	0.627813	FALSE	FALSE	FALSE	FALSE	SRGAP2B
chr1.145094548.145096091	ENSG00000215784	0	-0.452989	0.141016	FALSE	FALSE	TRUE	FALSE	FAM72D
chr1.145214370.145215613	ENSG00000272419	445	0.883781	0.0385963	FALSE	FALSE	TRUE	TRUE
chr1.145214370.145215613	ENSG00000281571	0	0.814451	0.0410772	FALSE	FALSE	TRUE	TRUE
chr1.145215787.145216452	ENSG00000272419	0	0.613553	0.0743162	FALSE	FALSE	TRUE	TRUE
chr1.145215787.145216452	ENSG00000281571	936	0.477544	0.084694	FALSE	FALSE	TRUE	TRUE
chr1.145216613.145217070	ENSG00000272419	-555	0.739219	0.101398	TRUE	TRUE	TRUE	TRUE
chr1.145216613.145217070	ENSG00000281571	1762	0.63431	0.115314	TRUE	TRUE	TRUE	TRUE
chr1.145232891.145233035	ENSG00000223612	0	0.0849846	0.126148	FALSE	FALSE	TRUE	TRUE
chr1.145280640.145282556	ENSG00000276216	0	-0.475303	0.444002	FALSE	FALSE	TRUE	FALSE
chr1.145607769.145608722	ENSG00000272150	0	0.419046	0.035583	FALSE	FALSE	FALSE	FALSE	NBPF25P
chr1.145607769.145608722	ENSG00000117262	0	-0.505276	0.237595	FALSE	FALSE	TRUE	TRUE	GPR89A
chr1.145822252.145822432	ENSG00000265491	1645	0.0814853	0.183282	TRUE	FALSE	TRUE	TRUE	RNF115
chr1.145822252.145822432	ENSG00000186141	-1656	0.897505	0.0184488	TRUE	FALSE	TRUE	TRUE	POLR3C
chr1.145823695.145824259	ENSG00000265491	0	-0.0640812	0.162525	TRUE	TRUE	TRUE	TRUE	RNF115
chr1.145823695.145824259	ENSG00000186141	0	-0.859881	0.107097	TRUE	TRUE	TRUE	TRUE	POLR3C
chr1.145845311.145845709	ENSG00000186364	0	-0.000268012	0.53437	TRUE	TRUE	FALSE	FALSE	NUDT17
chr1.145846298.145846373	ENSG00000186364	669	0.887122	0.0704829	FALSE	FALSE	FALSE	FALSE	NUDT17
chr1.145858374.145859987	ENSG00000131788	0	0.370613	0.526073	FALSE	FALSE	TRUE	TRUE	PIAS3
chr1.145918215.145918362	ENSG00000131779	475	0.369886	0.147043	FALSE	FALSE	TRUE	TRUE	PEX11B
chr1.145918215.145918362	ENSG00000211451	-651	0.0620123	0.463237	FALSE	FALSE	FALSE	FALSE	GNRHR2
chr1.145918606.145919281	ENSG00000131779	0	-0.581052	0.182934	TRUE	FALSE	TRUE	TRUE	PEX11B
chr1.145918606.145919281	ENSG00000211451	0	0.521601	0.219283	TRUE	FALSE	FALSE	FALSE	GNRHR2
chr1.145926641.145927901	ENSG00000265241	0	-0.276946	0.000612995	TRUE	FALSE	TRUE	TRUE	RBM8A
chr1.145926641.145927901	ENSG00000234222	51	0.670009	0.0690052	TRUE	FALSE	FALSE	FALSE	LIX1L-AS1
chr1.145956972.145957152	ENSG00000271601	849	0.369859	0.22915	TRUE	FALSE	TRUE	TRUE	LIX1L
chr1.145957397.145958287	ENSG00000271601	0	0.179498	0.238821	TRUE	TRUE	TRUE	TRUE	LIX1L
chr1.145960535.145960660	ENSG00000271601	-2534	0.54644	0.303109	FALSE	FALSE	TRUE	TRUE	LIX1L
chr1.145961722.145962275	ENSG00000272031	2307	0.915642	0.0231219	TRUE	TRUE	TRUE	TRUE	ANKRD34A
chr1.145961722.145962275	ENSG00000121851	-2427	-0.510873	0.0101962	TRUE	TRUE	TRUE	TRUE	POLR3GL
chr1.145962556.145963412	ENSG00000272031	1170	0.154603	0.54367	FALSE	FALSE	TRUE	TRUE	ANKRD34A
chr1.145962556.145963412	ENSG00000121851	-1290	-0.597638	0.181543	FALSE	FALSE	TRUE	TRUE	POLR3GL
chr1.145964284.145964998	ENSG00000272031	0	-0.495759	0.223364	TRUE	TRUE	TRUE	TRUE	ANKRD34A
chr1.145964284.145964998	ENSG00000121851	0	0.927629	0.0570056	TRUE	TRUE	TRUE	TRUE	POLR3GL
chr1.145994609.145994909	ENSG00000265972	1691	0.106386	0.11265	FALSE	FALSE	TRUE	TRUE	TXNIP
chr1.145995655.145995810	ENSG00000265972	790	0.662528	0.0900627	TRUE	TRUE	TRUE	TRUE	TXNIP
chr1.145996526.145997520	ENSG00000265972	0	0.9285	0.0169667	TRUE	TRUE	TRUE	TRUE	TXNIP
chr1.145998113.145998569	ENSG00000265972	-1513	0.955579	0.00395561	TRUE	TRUE	TRUE	TRUE	TXNIP
chr1.146228014.146228525	ENSG00000213240	475	-0.104492	0.0773839	FALSE	FALSE	FALSE	FALSE
chr1.146228014.146228525	ENSG00000264343	501	-0.149281	0.126507	FALSE	FALSE	TRUE	TRUE	NOTCH2NLA
chr1.146228705.146229254	ENSG00000213240	0	0.896578	0.0242054	FALSE	FALSE	FALSE	FALSE
chr1.146228705.146229254	ENSG00000264343	0	0.734797	0.146283	FALSE	FALSE	TRUE	TRUE	NOTCH2NLA
chr1.146297754.146298802	ENSG00000271121	0	-0.255012	0.425974	FALSE	FALSE	TRUE	TRUE
chr1.146376358.146378144	ENSG00000273768	0	-0.374188	0.399279	FALSE	FALSE	FALSE	FALSE	RNVU1-29
chr1.146938205.146938779	ENSG00000268043	0	-0.397641	0.0989249	FALSE	FALSE	TRUE	TRUE	NBPF12
chr1.146938955.146939095	ENSG00000268043	211	0.370368	0.370541	TRUE	TRUE	TRUE	TRUE	NBPF12
chr1.147171971.147173248	ENSG00000131791	0	-0.854077	0.0731998	FALSE	FALSE	TRUE	TRUE	PRKAB2
chr1.147171971.147173248	ENSG00000237188	0	-0.287965	0.652187	FALSE	FALSE	TRUE	TRUE
chr1.147242311.147243229	ENSG00000131781	0	-0.0309354	0.649567	FALSE	FALSE	FALSE	FALSE	FMO5
chr1.147242311.147243229	ENSG00000131778	0	0.0305443	0.455864	FALSE	FALSE	TRUE	FALSE	CHD1L
chr1.147243500.147243598	ENSG00000131781	-450	-0.349421	0.345556	FALSE	FALSE	FALSE	FALSE	FMO5
chr1.147243500.147243598	ENSG00000131778	859	0.266413	0.248488	FALSE	FALSE	TRUE	FALSE	CHD1L
chr1.147539699.147539984	ENSG00000116128	-1428	0.871843	0.0886046	TRUE	FALSE	TRUE	TRUE	BCL9
chr1.147541184.147541546	ENSG00000116128	0	-0.657488	0.134638	TRUE	FALSE	TRUE	TRUE	BCL9
chr1.147541817.147542281	ENSG00000116128	405	0.779074	0.178522	FALSE	FALSE	TRUE	TRUE	BCL9
chr1.147542669.147542882	ENSG00000116128	1257	0.701419	0.204698	TRUE	TRUE	TRUE	TRUE	BCL9
chr1.147669511.147670726	ENSG00000162836	0	-0.358059	0.273206	FALSE	FALSE	TRUE	TRUE	ACP6
chr1.147928170.147929130	ENSG00000188092	0	-0.0363757	0.102526	FALSE	FALSE	TRUE	TRUE	GPR89B
chr1.148037896.148039456	ENSG00000206585	0	-0.457205	0.277546	TRUE	TRUE	FALSE	FALSE	RNVU1-7
chr1.148151583.148151791	ENSG00000263956	531	0.202965	0.28358	FALSE	FALSE	TRUE	TRUE	NBPF11
chr1.148151953.148152438	ENSG00000263956	0	-0.335419	0.142663	FALSE	FALSE	TRUE	TRUE	NBPF11
chr1.148402053.148403119	ENSG00000231551	0	0.0203694	0.631624	FALSE	FALSE	TRUE	TRUE
chr1.148458333.148459588	ENSG00000280649	0	0.880479	0.0044152	FALSE	FALSE	FALSE	FALSE
chr1.148459743.148460377	ENSG00000280649	929	0.54287	0.13768	FALSE	FALSE	FALSE	FALSE
chr1.148460602.148461036	ENSG00000280649	1788	0.733175	0.0847854	TRUE	TRUE	FALSE	FALSE
chr1.148522159.148524077	ENSG00000274020	-2555	-0.552778	0.265931	FALSE	FALSE	TRUE	TRUE	LINC01138
chr1.148678768.148679287	ENSG00000270629	464	-0.0546327	0.110192	FALSE	FALSE	TRUE	TRUE	NBPF14
chr1.148679453.148680213	ENSG00000270629	0	0.60034	0.279369	FALSE	FALSE	TRUE	TRUE	NBPF14
chr1.148748537.148749585	ENSG00000177144	0	-0.206264	0.412328	FALSE	FALSE	TRUE	TRUE	NUDT4B
chr1.149102645.149102860	ENSG00000269713	701	0.00208862	0.213593	FALSE	FALSE	TRUE	TRUE	NBPF9
chr1.149103115.149103879	ENSG00000269713	0	0.533308	0.036336	FALSE	FALSE	TRUE	TRUE	NBPF9
chr1.149174838.149175005	ENSG00000274265	-1017	0.584857	0.0642944	TRUE	TRUE	TRUE	TRUE
chr1.149175470.149177518	ENSG00000274265	0	0.753535	0.117577	FALSE	FALSE	TRUE	TRUE
chr1.149390159.149390929	ENSG00000271383	0	0.873876	0.04324	FALSE	FALSE	TRUE	FALSE	NBPF19
chr1.149391106.149391610	ENSG00000271383	483	-0.28684	0.0124107	FALSE	FALSE	TRUE	FALSE	NBPF19
chr1.149606127.149606570	ENSG00000277147	0	0.631916	0.167342	TRUE	TRUE	TRUE	TRUE	LINC00869
chr1.149606127.149606570	ENSG00000275557	-1195	0.694284	0.0456626	TRUE	TRUE	TRUE	TRUE
chr1.149606741.149608826	ENSG00000277147	407	0.808833	0.0731758	FALSE	FALSE	TRUE	TRUE	LINC00869
chr1.149606741.149608826	ENSG00000275557	0	0.843002	0.0305956	FALSE	FALSE	TRUE	TRUE
chr1.149812017.149813819	ENSG00000203814	0	0.235067	0.276129	FALSE	FALSE	TRUE	TRUE	H2BC18
chr1.149831811.149831981	ENSG00000270882	-678	0.845005	0.131827	FALSE	FALSE	TRUE	TRUE	H4C14
chr1.149832145.149833418	ENSG00000270882	0	0.820027	0.122258	FALSE	FALSE	TRUE	TRUE	H4C14
chr1.149841158.149843519	ENSG00000203812	0	-0.00526639	0.228191	FALSE	FALSE	TRUE	FALSE	H2AC18
chr1.149841158.149843519	ENSG00000220323	0	0.171996	0.184769	FALSE	FALSE	TRUE	TRUE
chr1.149844229.149844450	ENSG00000203812	-1493	0.484142	0.204513	TRUE	TRUE	TRUE	FALSE	H2AC18
chr1.149844229.149844450	ENSG00000220323	1188	-0.160563	0.194027	TRUE	TRUE	TRUE	TRUE
chr1.149850020.149850186	ENSG00000261716	-996	0.583082	0.163481	FALSE	FALSE	TRUE	TRUE	H2BC20P
chr1.149850020.149850186	ENSG00000203819	586	0.696636	0.0558066	FALSE	FALSE	TRUE	TRUE
chr1.149850020.149850186	ENSG00000272196	-875	0.176226	0.079274	FALSE	FALSE	TRUE	FALSE	H2AC19
chr1.149850476.149852654	ENSG00000261716	-1452	0.363941	0.107959	FALSE	FALSE	TRUE	TRUE	H2BC20P
chr1.149850476.149852654	ENSG00000203819	0	0.210862	0.153366	FALSE	FALSE	TRUE	TRUE
chr1.149850476.149852654	ENSG00000272196	0	0.0300414	0.250847	FALSE	FALSE	TRUE	FALSE	H2AC19
chr1.149860393.149861671	ENSG00000270276	0	0.716583	0.16823	FALSE	FALSE	TRUE	TRUE	H4C15
chr1.149860393.149861671	ENSG00000264207	0	0.573271	0.263279	FALSE	FALSE	TRUE	TRUE
chr1.149861835.149862002	ENSG00000270276	-625	0.58292	0.329339	FALSE	FALSE	TRUE	TRUE	H4C15
chr1.149861835.149862002	ENSG00000264207	564	0.461314	0.377858	FALSE	FALSE	TRUE	TRUE
chr1.149885365.149888642	ENSG00000184678	0	0.584746	0.141294	TRUE	TRUE	TRUE	TRUE	H2BC21
chr1.149885365.149888642	ENSG00000184260	0	0.47783	0.115628	TRUE	TRUE	FALSE	FALSE	H2AC20
chr1.149885365.149888642	ENSG00000178096	0	-0.403329	0.446575	TRUE	TRUE	TRUE	TRUE	BOLA1
chr1.149927519.149928049	ENSG00000143368	295	-0.931501	0.023007	FALSE	FALSE	TRUE	FALSE	SF3B4
chr1.149928202.149928441	ENSG00000143368	0	0.0267507	0.831001	TRUE	TRUE	TRUE	FALSE	SF3B4
chr1.149939135.149939332	ENSG00000014914	-2266	-0.0876478	0.213546	TRUE	FALSE	FALSE	FALSE	MTMR11
chr1.150009726.150010022	ENSG00000264522	654	0.665504	0.0251557	TRUE	FALSE	TRUE	FALSE	OTUD7B
chr1.150010400.150010875	ENSG00000264522	0	0.497914	0.387916	FALSE	FALSE	TRUE	FALSE	OTUD7B
chr1.150066912.150067017	ENSG00000136631	-276	0.147398	0.413796	FALSE	FALSE	TRUE	TRUE	VPS45
chr1.150067195.150067886	ENSG00000136631	0	0.00463674	0.490746	FALSE	FALSE	TRUE	TRUE	VPS45
chr1.150149493.150150214	ENSG00000023902	310	0.897819	0.0654388	TRUE	FALSE	TRUE	TRUE	PLEKHO1
chr1.150150588.150150870	ENSG00000023902	1405	0.804277	0.014805	FALSE	FALSE	TRUE	TRUE	PLEKHO1
chr1.150151314.150151807	ENSG00000023902	2131	0.873183	0.106305	TRUE	FALSE	TRUE	TRUE	PLEKHO1
chr1.150234047.150236628	ENSG00000143401	0	-0.744536	0.0376407	TRUE	TRUE	TRUE	TRUE	ANP32E
chr1.150268351.150268479	ENSG00000117362	1101	-0.249872	0.295393	FALSE	FALSE	FALSE	FALSE	APH1A
chr1.150268351.150268479	ENSG00000118292	151	0.878132	0.0572246	FALSE	FALSE	TRUE	FALSE	C1orf54
chr1.150268779.150269405	ENSG00000117362	175	-0.140225	0.367067	FALSE	FALSE	FALSE	FALSE	APH1A
chr1.150268779.150269405	ENSG00000118292	579	0.540393	0.29226	FALSE	FALSE	TRUE	FALSE	C1orf54
chr1.150281334.150281528	ENSG00000159208	-1015	0.852276	0.0461242	FALSE	FALSE	TRUE	TRUE	CIART
chr1.150281750.150282650	ENSG00000159208	0	0.792206	0.0431637	TRUE	FALSE	TRUE	TRUE	CIART
chr1.150293688.150294133	ENSG00000266472	0	0.839939	0.0957808	FALSE	FALSE	TRUE	TRUE	MRPS21
chr1.150321140.150321655	ENSG00000117360	0	0.912377	0.0268189	FALSE	FALSE	TRUE	FALSE	PRPF3
chr1.150322435.150322627	ENSG00000117360	959	0.756733	0.0183482	TRUE	FALSE	TRUE	FALSE	PRPF3
chr1.150363364.150365049	ENSG00000163125	273	0.879213	0.0113902	TRUE	TRUE	TRUE	TRUE	RPRD2
chr1.150365370.150365503	ENSG00000163125	2279	-0.0821303	0.432797	FALSE	FALSE	TRUE	TRUE	RPRD2
chr1.150487166.150487517	ENSG00000143374	0	-0.0743517	0.295933	FALSE	FALSE	TRUE	TRUE	TARS2
chr1.150548919.150549033	ENSG00000143382	-336	-0.671492	0.059424	FALSE	FALSE	TRUE	TRUE	ADAMTSL4
chr1.150560018.150560421	ENSG00000237781	-2294	-0.174616	0.194481	FALSE	FALSE	TRUE	TRUE
chr1.150572383.150572552	ENSG00000203804	2000	0.41772	0.00160305	FALSE	FALSE	TRUE	TRUE	ADAMTSL4-AS1
chr1.150573353.150573526	ENSG00000203804	1026	-0.925957	0.0160604	TRUE	TRUE	TRUE	TRUE	ADAMTSL4-AS1
chr1.150577796.150577951	ENSG00000143384	1787	0.554613	0.190124	TRUE	TRUE	TRUE	TRUE	MCL1
chr1.150578686.150580004	ENSG00000143384	0	0.154964	0.0944657	FALSE	FALSE	TRUE	TRUE	MCL1
chr1.150629063.150630082	ENSG00000143420	0	-0.301468	0.212034	TRUE	TRUE	FALSE	TRUE	ENSA
chr1.150697102.150697552	ENSG00000143457	0	-0.0852554	0.180317	TRUE	TRUE	TRUE	TRUE	GOLPH3L
chr1.150765690.150765967	ENSG00000163131	0	-0.860669	0.0340945	TRUE	TRUE	FALSE	FALSE	CTSS
chr1.150876151.150876942	ENSG00000143437	0	0.402585	0.00225182	FALSE	FALSE	TRUE	FALSE	ARNT
chr1.150925585.150925641	ENSG00000143379	-622	0.640116	0.0286643	FALSE	FALSE	TRUE	TRUE	SETDB1
chr1.150926079.150926737	ENSG00000143379	0	-0.262327	0.274672	TRUE	FALSE	TRUE	TRUE	SETDB1
chr1.150973865.150974081	ENSG00000143418	923	-0.00902687	0.23945	FALSE	FALSE	FALSE	FALSE	CERS2
chr1.150974347.150975094	ENSG00000143418	0	-0.846585	0.0136865	FALSE	FALSE	FALSE	FALSE	CERS2
chr1.150977408.150977584	ENSG00000143418	-2404	0.817568	0.0964525	FALSE	FALSE	FALSE	FALSE	CERS2
chr1.150979554.150979728	ENSG00000143412	-2289	0.276065	0.293413	FALSE	FALSE	TRUE	TRUE	ANXA9
chr1.151006832.151006966	ENSG00000143409	1409	0.479454	0.460814	FALSE	FALSE	TRUE	TRUE	MINDY1
chr1.151006832.151006966	ENSG00000143363	-1454	0.141157	0.42098	FALSE	FALSE	FALSE	FALSE	PRUNE1
chr1.151008116.151008524	ENSG00000143409	0	0.295543	0.0579541	TRUE	TRUE	TRUE	TRUE	MINDY1
chr1.151008116.151008524	ENSG00000143363	0	0.660393	0.213023	TRUE	TRUE	FALSE	FALSE	PRUNE1
chr1.151047623.151047840	ENSG00000143443	0	0.447184	0.463894	FALSE	FALSE	TRUE	TRUE	C1orf56
chr1.151048192.151048744	ENSG00000143443	452	0.441748	0.19995	TRUE	TRUE	TRUE	TRUE	C1orf56
chr1.151056259.151056760	ENSG00000213190	-998	0.87031	0.0856769	TRUE	TRUE	TRUE	TRUE	MLLT11
chr1.151057017.151057221	ENSG00000213190	-537	0.737731	0.0700531	FALSE	FALSE	TRUE	TRUE	MLLT11
chr1.151057437.151058090	ENSG00000213190	0	0.845363	0.0717549	TRUE	FALSE	TRUE	TRUE	MLLT11
chr1.151058343.151058442	ENSG00000213190	585	0.880568	0.0361312	FALSE	FALSE	TRUE	TRUE	MLLT11
chr1.151059302.151059807	ENSG00000213190	1544	0.923042	0.00520926	TRUE	FALSE	TRUE	TRUE	MLLT11
chr1.151060219.151060382	ENSG00000213190	2461	0.121527	0.357827	FALSE	FALSE	TRUE	TRUE	MLLT11
chr1.151070403.151071555	ENSG00000197622	-78	0.0401445	0.529592	FALSE	FALSE	TRUE	TRUE	CDC42SE1
chr1.151070403.151071555	ENSG00000143458	0	-0.129125	0.366822	FALSE	FALSE	FALSE	FALSE	GABPB2
chr1.151145882.151146000	ENSG00000143434	664	0.695442	0.254058	FALSE	FALSE	TRUE	TRUE	SEMA6C
chr1.151146588.151147096	ENSG00000143434	0	0.925578	0.0176155	FALSE	FALSE	TRUE	TRUE	SEMA6C
chr1.151156085.151156292	ENSG00000163154	-337	-0.111038	0.465207	FALSE	FALSE	TRUE	TRUE	TNFAIP8L2
chr1.151156085.151156292	ENSG00000163156	-372	-0.518936	0.10761	FALSE	FALSE	TRUE	TRUE	SCNM1
chr1.151156519.151156713	ENSG00000163154	0	0.649509	0.240177	TRUE	TRUE	TRUE	TRUE	TNFAIP8L2
chr1.151156519.151156713	ENSG00000163156	0	0.473618	0.229596	TRUE	TRUE	TRUE	TRUE	SCNM1
chr1.151157134.151157517	ENSG00000163154	505	0.257441	0.330408	TRUE	FALSE	TRUE	TRUE	TNFAIP8L2
chr1.151157134.151157517	ENSG00000163156	470	-0.0176407	0.202064	TRUE	FALSE	TRUE	TRUE	SCNM1
chr1.151158265.151158586	ENSG00000163154	1636	-0.420086	0.197628	FALSE	FALSE	TRUE	TRUE	TNFAIP8L2
chr1.151158265.151158586	ENSG00000163156	1601	-0.551779	0.229694	FALSE	FALSE	TRUE	TRUE	SCNM1
chr1.151165819.151166366	ENSG00000163155	0	-0.332813	0.279281	FALSE	FALSE	TRUE	TRUE	LYSMD1
chr1.151198292.151199044	ENSG00000163159	-2971	-0.838021	0.0503421	TRUE	TRUE	TRUE	TRUE	VPS72
chr1.151198292.151199044	ENSG00000143398	343	-0.828829	0.0606736	TRUE	TRUE	TRUE	FALSE	PIP5K1A
chr1.151200351.151200507	ENSG00000143398	2402	0.790706	0.060908	TRUE	TRUE	TRUE	FALSE	PIP5K1A
chr1.151251847.151251946	ENSG00000159352	-2757	-0.803134	0.0679332	FALSE	FALSE	TRUE	TRUE	PSMD4
chr1.151254555.151255036	ENSG00000159352	0	-0.604113	0.216233	FALSE	FALSE	TRUE	TRUE	PSMD4
chr1.151281040.151283085	ENSG00000143373	0	0.813997	0.0261878	TRUE	TRUE	TRUE	TRUE	ZNF687
chr1.151326970.151327862	ENSG00000143393	0	0.179213	0.310184	TRUE	FALSE	TRUE	TRUE	PI4KB
chr1.151346826.151347786	ENSG00000143390	0	0.0137816	0.0123853	TRUE	TRUE	TRUE	TRUE	RFX5
chr1.151399151.151399830	ENSG00000159377	0	-0.736794	0.110339	FALSE	FALSE	TRUE	TRUE	PSMB4
chr1.151457851.151458137	ENSG00000143442	1328	-0.387403	0.0492601	FALSE	FALSE	TRUE	FALSE	POGZ
chr1.151458400.151459233	ENSG00000143442	232	0.706011	0.083944	TRUE	TRUE	TRUE	FALSE	POGZ
chr1.151459396.151459625	ENSG00000143442	0	-0.210388	0.416747	FALSE	FALSE	TRUE	FALSE	POGZ
chr1.151511019.151511573	ENSG00000143375	509	-0.594605	0.238057	TRUE	TRUE	TRUE	TRUE	CGN
chr1.151511773.151511919	ENSG00000143375	1263	0.114911	0.0276172	FALSE	FALSE	TRUE	TRUE	CGN
chr1.151540086.151540567	ENSG00000143367	0	0.173695	0.516137	TRUE	TRUE	TRUE	TRUE	TUFT1
chr1.151611783.151612922	ENSG00000143376	0	-0.669311	0.199283	TRUE	TRUE	TRUE	TRUE	SNX27
chr1.151763419.151763652	ENSG00000143436	0	0.804898	0.0603803	FALSE	FALSE	TRUE	TRUE	MRPL9
chr1.151763419.151763652	ENSG00000143450	520	-0.0414889	0.561778	FALSE	FALSE	TRUE	TRUE	OAZ3
chr1.151790050.151790928	ENSG00000182134	488	-0.369978	0.510448	TRUE	TRUE	TRUE	TRUE	TDRKH
chr1.151790050.151790928	ENSG00000203288	0	0.796545	0.00652656	TRUE	TRUE	TRUE	TRUE	TDRKH-AS1
chr1.151830823.151830931	ENSG00000143365	941	0.178258	0.272862	FALSE	FALSE	FALSE	FALSE	RORC
chr1.151837267.151837568	ENSG00000225556	2989	0.555724	0.0612169	FALSE	FALSE	TRUE	TRUE	C2CD4D
chr1.151839536.151840034	ENSG00000225556	523	0.619436	0.230669	TRUE	FALSE	TRUE	TRUE	C2CD4D
chr1.151839536.151840034	ENSG00000234614	-1843	0.658594	0.147366	TRUE	FALSE	TRUE	FALSE
chr1.151909185.151909975	ENSG00000159445	0	-0.00178642	0.496503	TRUE	TRUE	TRUE	TRUE	THEM4
chr1.151993221.151993369	ENSG00000197747	1021	-0.0963942	0.431343	FALSE	FALSE	TRUE	TRUE	S100A10
chr1.151993556.151994502	ENSG00000197747	0	0.779924	0.0186257	TRUE	FALSE	TRUE	TRUE	S100A10
chr1.152047942.152048669	ENSG00000163191	-35	0.449138	0.3086	FALSE	FALSE	TRUE	TRUE	S100A11
chr1.153533216.153533398	ENSG00000197956	2846	0.666306	0.243134	FALSE	FALSE	TRUE	TRUE	S100A6
chr1.153535346.153536503	ENSG00000197956	0	0.132668	0.296916	FALSE	FALSE	TRUE	TRUE	S100A6
chr1.153633789.153634583	ENSG00000189171	-2429	0.530796	0.0716095	FALSE	FALSE	TRUE	TRUE	S100A13
chr1.153633789.153634583	ENSG00000271853	0	0.696195	0.027532	FALSE	FALSE	TRUE	TRUE
chr1.153633789.153634583	ENSG00000160679	0	-0.772669	0.0979662	FALSE	FALSE	TRUE	TRUE	CHTOP
chr1.153658518.153659012	ENSG00000143553	0	-0.936421	0.0307093	FALSE	FALSE	TRUE	TRUE	SNAPIN
chr1.153670524.153672201	ENSG00000143621	0	-0.232369	0.0161423	TRUE	FALSE	TRUE	TRUE	ILF2
chr1.153727491.153728161	ENSG00000143624	0	-0.52212	0.318122	TRUE	TRUE	TRUE	TRUE	INTS3
chr1.153728389.153728508	ENSG00000143624	322	-0.143241	0.622191	FALSE	FALSE	TRUE	TRUE	INTS3
chr1.153775220.153775872	ENSG00000143554	866	0.309998	0.204552	FALSE	FALSE	TRUE	TRUE	SLC27A3
chr1.153776084.153776250	ENSG00000143554	1730	-0.41571	0.293574	FALSE	FALSE	TRUE	TRUE	SLC27A3
chr1.153920529.153920637	ENSG00000143614	2723	0.85573	0.0841703	FALSE	FALSE	TRUE	TRUE	GATAD2B
chr1.153920529.153920637	ENSG00000284738	-2700	0.373945	0.565691	FALSE	FALSE	FALSE	FALSE	LOC101928059
chr1.153922207.153923598	ENSG00000143614	0	0.800036	0.102352	TRUE	TRUE	TRUE	TRUE	GATAD2B
chr1.153922207.153923598	ENSG00000284738	0	0.438336	0.04282	TRUE	TRUE	FALSE	FALSE	LOC101928059
chr1.153924027.153924224	ENSG00000143614	-667	-0.358382	0.2518	FALSE	FALSE	TRUE	TRUE	GATAD2B
chr1.153924027.153924224	ENSG00000284738	690	-0.167591	0.0887865	FALSE	FALSE	FALSE	FALSE	LOC101928059
chr1.153945188.153946856	ENSG00000198837	0	0.691847	0.20426	FALSE	FALSE	TRUE	TRUE	DENND4B
chr1.153957758.153958871	ENSG00000160741	0	0.890943	0.0758995	TRUE	TRUE	TRUE	TRUE	CRTC2
chr1.153966537.153966645	ENSG00000143570	1539	0.139877	0.687531	FALSE	FALSE	TRUE	TRUE	SLC39A1
chr1.153966537.153966645	ENSG00000143578	-889	0.346209	0.357549	FALSE	FALSE	TRUE	TRUE	CREB3L4
chr1.153967152.153967978	ENSG00000143570	206	-0.816336	0.0734152	TRUE	TRUE	TRUE	TRUE	SLC39A1
chr1.153967152.153967978	ENSG00000143578	0	0.605675	0.0136071	TRUE	TRUE	TRUE	TRUE	CREB3L4
chr1.153977175.153977350	ENSG00000143543	338	0.847259	0.101927	FALSE	FALSE	TRUE	TRUE	JTB
chr1.153977175.153977350	ENSG00000272654	-393	-0.105466	0.462858	FALSE	FALSE	FALSE	FALSE
chr1.153977560.153977821	ENSG00000143543	0	-0.391713	0.135098	FALSE	FALSE	TRUE	TRUE	JTB
chr1.153977560.153977821	ENSG00000272654	0	-0.590987	0.0620392	FALSE	FALSE	FALSE	FALSE
chr1.153978100.153978204	ENSG00000143543	-412	0.234498	0.0614794	FALSE	FALSE	TRUE	TRUE	JTB
chr1.153978100.153978204	ENSG00000272654	357	0.258654	0.341133	FALSE	FALSE	FALSE	FALSE
chr1.153986822.153987027	ENSG00000143545	-464	0.494682	0.0808277	FALSE	FALSE	TRUE	TRUE	RAB13
chr1.153990532.153991059	ENSG00000177954	0	0.680425	0.197637	FALSE	FALSE	TRUE	TRUE	RPS27
chr1.154220045.154221716	ENSG00000143612	0	-0.488278	0.0407334	TRUE	FALSE	TRUE	FALSE	C1orf43
chr1.154220045.154221716	ENSG00000143569	0	-0.546461	0.159789	TRUE	FALSE	TRUE	TRUE	UBAP2L
chr1.154272078.154272743	ENSG00000143575	0	-0.173869	0.2266	TRUE	FALSE	TRUE	TRUE	HAX1
chr1.154324667.154326026	ENSG00000143515	0	0.870625	0.0322867	FALSE	FALSE	TRUE	TRUE	ATP8B2
chr1.154327597.154327803	ENSG00000143515	2044	0.467738	0.33069	TRUE	TRUE	TRUE	TRUE	ATP8B2
chr1.154328318.154328920	ENSG00000143515	2765	-0.190478	0.288859	TRUE	TRUE	TRUE	TRUE	ATP8B2
chr1.154403340.154403830	ENSG00000228013	2734	0.360436	0.215625	TRUE	TRUE	TRUE	TRUE	IL6R-AS1
chr1.154403340.154403830	ENSG00000160712	-1363	0.508828	0.0169553	TRUE	TRUE	FALSE	FALSE	IL6R
chr1.154404561.154406744	ENSG00000228013	0	0.720766	0.229224	TRUE	TRUE	TRUE	TRUE	IL6R-AS1
chr1.154404561.154406744	ENSG00000160712	0	0.649574	0.0240449	TRUE	TRUE	FALSE	FALSE	IL6R
chr1.154406986.154408081	ENSG00000228013	-422	0.517705	0.266789	FALSE	FALSE	TRUE	TRUE	IL6R-AS1
chr1.154406986.154408081	ENSG00000160712	1793	-0.124373	0.153495	FALSE	FALSE	FALSE	FALSE	IL6R
chr1.154558607.154559812	ENSG00000160714	0	-0.915566	0.0410409	TRUE	TRUE	TRUE	TRUE	UBE2Q1
chr1.154627222.154628025	ENSG00000160710	0	0.49107	0.16178	FALSE	FALSE	TRUE	FALSE	ADAR
chr1.154870291.154870486	ENSG00000143603	-11	0.73825	0.0957531	TRUE	TRUE	TRUE	FALSE	KCNN3
chr1.154936247.154937791	ENSG00000163344	0	-0.988213	0.00646869	TRUE	TRUE	TRUE	TRUE	PMVK
chr1.154955138.154956502	ENSG00000163346	0	0.873355	0.0713602	TRUE	TRUE	TRUE	TRUE	PBXIP1
chr1.154961290.154962513	ENSG00000163348	1340	0.225971	0.0484491	FALSE	FALSE	TRUE	TRUE	PYGO2
chr1.154961290.154962513	ENSG00000271380	0	0.573895	0.383935	FALSE	FALSE	TRUE	TRUE	LOC101928120
chr1.154973734.154975997	ENSG00000160691	0	0.588664	0.0817829	TRUE	TRUE	TRUE	TRUE	SHC1
chr1.154973734.154975997	ENSG00000173207	0	-0.927926	0.0193307	TRUE	TRUE	TRUE	TRUE	CKS1B
chr1.154983017.154983622	ENSG00000160688	0	-0.859201	0.0638491	FALSE	FALSE	TRUE	TRUE	FLAD1
chr1.154999179.155000345	ENSG00000160685	-2285	0.769883	0.0518128	TRUE	FALSE	TRUE	TRUE	ZBTB7B
chr1.155000696.155002596	ENSG00000160685	-34	-0.786553	0.126671	TRUE	TRUE	TRUE	TRUE	ZBTB7B
chr1.155004573.155005232	ENSG00000160685	1943	-0.439146	0.212324	TRUE	TRUE	TRUE	TRUE	ZBTB7B
chr1.155050565.155050740	ENSG00000143537	0	0.571782	0.139779	FALSE	FALSE	TRUE	TRUE	ADAM15
chr1.155050910.155051408	ENSG00000143537	344	-0.447155	0.263276	FALSE	FALSE	TRUE	TRUE	ADAM15
chr1.155051786.155051928	ENSG00000143537	1220	0.565046	0.0690345	FALSE	FALSE	TRUE	TRUE	ADAM15
chr1.155052141.155052342	ENSG00000143537	1575	0.161751	0.154655	FALSE	FALSE	TRUE	TRUE	ADAM15
chr1.155052604.155052700	ENSG00000143537	2038	0.0200837	0.458855	FALSE	FALSE	TRUE	TRUE	ADAM15
chr1.155061588.155061780	ENSG00000243364	-1951	-0.682369	0.224455	FALSE	FALSE	TRUE	TRUE	EFNA4
chr1.155062808.155062945	ENSG00000243364	-786	0.127231	0.00306506	FALSE	FALSE	TRUE	TRUE	EFNA4
chr1.155063543.155064007	ENSG00000243364	0	-0.017452	0.331182	FALSE	FALSE	TRUE	TRUE	EFNA4
chr1.155064253.155064387	ENSG00000243364	522	0.41015	0.371241	TRUE	FALSE	TRUE	TRUE	EFNA4
chr1.155127025.155127124	ENSG00000169242	-336	-0.246499	0.305567	FALSE	FALSE	TRUE	FALSE	EFNA1
chr1.155127670.155127939	ENSG00000169242	210	-0.453285	0.0425897	FALSE	FALSE	TRUE	FALSE	EFNA1
chr1.155135085.155136747	ENSG00000169241	0	0.906044	0.0788445	FALSE	FALSE	TRUE	TRUE	SLC50A1
chr1.155140437.155140669	ENSG00000179085	0	-0.838583	0.0674966	FALSE	FALSE	FALSE	TRUE	DPM3
chr1.155172620.155173528	ENSG00000163463	0	0.384714	0.175543	FALSE	FALSE	TRUE	TRUE	KRTCAP2
chr1.155172620.155173528	ENSG00000163462	-259	0.552888	0.328561	FALSE	FALSE	TRUE	TRUE	TRIM46
chr1.155173726.155174030	ENSG00000163463	-251	0.913451	0.0184253	TRUE	FALSE	TRUE	TRUE	KRTCAP2
chr1.155173726.155174030	ENSG00000163462	0	0.324471	0.014823	TRUE	FALSE	TRUE	TRUE	TRIM46
chr1.155174214.155174313	ENSG00000163463	-739	0.745493	0.0195752	FALSE	FALSE	TRUE	TRUE	KRTCAP2
chr1.155174214.155174313	ENSG00000163462	427	0.379699	0.32876	FALSE	FALSE	TRUE	TRUE	TRIM46
chr1.155176713.155176876	ENSG00000163462	2926	0.566326	0.186378	FALSE	FALSE	TRUE	TRUE	TRIM46
chr1.155192932.155193136	ENSG00000185499	-16	0.685397	0.249783	TRUE	FALSE	TRUE	TRUE	MUC1
chr1.155192932.155193136	ENSG00000231064	-1868	-0.762016	0.0263768	TRUE	FALSE	FALSE	FALSE
chr1.155193289.155195070	ENSG00000185499	-373	0.745224	0.128084	TRUE	FALSE	TRUE	TRUE	MUC1
chr1.155193289.155195070	ENSG00000231064	0	-0.80349	0.0943453	TRUE	FALSE	FALSE	FALSE
chr1.155206941.155207120	ENSG00000169231	1931	0.89462	0.0343002	FALSE	FALSE	TRUE	FALSE	THBS3
chr1.155206941.155207120	ENSG00000173171	-1579	-0.830598	0.018107	FALSE	FALSE	TRUE	TRUE	MTX1
chr1.155208536.155209320	ENSG00000169231	0	0.639849	0.00978764	TRUE	TRUE	TRUE	FALSE	THBS3
chr1.155208536.155209320	ENSG00000173171	0	-0.595572	0.0210331	TRUE	TRUE	TRUE	TRUE	MTX1
chr1.155226645.155227165	ENSG00000160766	257	0.338305	0.54202	FALSE	FALSE	TRUE	TRUE	GBAP1
chr1.155227352.155227997	ENSG00000160766	0	0.481572	0.309228	FALSE	FALSE	TRUE	TRUE	GBAP1
chr1.155227352.155227997	ENSG00000236675	-2978	-0.75668	0.165905	FALSE	FALSE	FALSE	FALSE
chr1.155244454.155245204	ENSG00000177628	0	0.625206	0.207221	FALSE	FALSE	TRUE	TRUE	GBA
chr1.155255413.155255592	ENSG00000160767	0	0.685476	0.13	FALSE	FALSE	TRUE	TRUE	FAM189B
chr1.155261501.155261609	ENSG00000116521	821	0.902784	0.0800074	TRUE	TRUE	TRUE	TRUE	SCAMP3
chr1.155261880.155262742	ENSG00000116521	0	0.458595	0.191535	TRUE	TRUE	TRUE	TRUE	SCAMP3
chr1.155277183.155277557	ENSG00000176444	934	0.395214	0.151419	TRUE	TRUE	TRUE	TRUE	CLK2
chr1.155277183.155277557	ENSG00000143630	-26	-0.337199	0.246775	TRUE	TRUE	FALSE	FALSE	HCN3
chr1.155278326.155278598	ENSG00000176444	0	0.372199	0.459965	FALSE	FALSE	TRUE	TRUE	CLK2
chr1.155278326.155278598	ENSG00000143630	743	-0.853586	0.0784242	FALSE	FALSE	FALSE	FALSE	HCN3
chr1.155308314.155308945	ENSG00000160752	0	-0.13375	0.271804	FALSE	FALSE	TRUE	TRUE	FDPS
chr1.155309184.155309326	ENSG00000160752	436	0.803081	0.00716262	FALSE	FALSE	TRUE	TRUE	FDPS
chr1.155320793.155320943	ENSG00000160753	0	0.617013	0.213337	FALSE	FALSE	TRUE	TRUE	RUSC1
chr1.155323131.155323562	ENSG00000225855	614	0.0366401	0.0951927	TRUE	FALSE	FALSE	FALSE	RUSC1-AS1
chr1.155323131.155323562	ENSG00000160753	2235	0.881493	0.0400459	TRUE	FALSE	TRUE	TRUE	RUSC1
chr1.155323757.155324746	ENSG00000225855	0	0.0829318	0.40002	TRUE	TRUE	FALSE	FALSE	RUSC1-AS1
chr1.155323757.155324746	ENSG00000160753	2861	0.389466	0.172616	TRUE	TRUE	TRUE	TRUE	RUSC1
chr1.155325008.155325107	ENSG00000225855	-832	0.407813	0.433412	FALSE	FALSE	FALSE	FALSE	RUSC1-AS1
chr1.155561886.155563671	ENSG00000116539	0	0.81309	0.0850409	TRUE	TRUE	FALSE	FALSE	ASH1L
chr1.155561886.155563671	ENSG00000235919	0	0.833236	0.105803	TRUE	TRUE	FALSE	FALSE	ASH1L-AS1
chr1.155609712.155610691	ENSG00000125459	0	0.472667	0.26434	FALSE	FALSE	TRUE	TRUE	MSTO1
chr1.155687802.155689318	ENSG00000163374	0	0.756472	0.215184	FALSE	FALSE	TRUE	TRUE	YY1AP1
chr1.155687802.155689318	ENSG00000132676	0	-0.183938	0.411316	FALSE	FALSE	FALSE	FALSE	DAP3
chr1.155745292.155746252	ENSG00000203761	0	0.463233	0.260579	FALSE	FALSE	TRUE	TRUE
chr1.155857106.155857419	ENSG00000116580	1981	0.524323	0.123012	FALSE	FALSE	TRUE	TRUE	GON4L
chr1.155857106.155857419	ENSG00000132718	-2090	0.395383	0.174155	FALSE	FALSE	FALSE	FALSE	SYT11
chr1.155859271.155859609	ENSG00000116580	0	0.11769	0.0489369	FALSE	FALSE	TRUE	TRUE	GON4L
chr1.155859271.155859609	ENSG00000132718	0	0.687714	0.234439	FALSE	FALSE	FALSE	FALSE	SYT11
chr1.155860024.155860161	ENSG00000116580	-624	-0.0998358	0.300151	FALSE	FALSE	TRUE	TRUE	GON4L
chr1.155860024.155860161	ENSG00000132718	515	-0.664154	0.0613501	FALSE	FALSE	FALSE	FALSE	SYT11
chr1.155910024.155910223	ENSG00000143622	1181	0.35701	0.213891	TRUE	TRUE	TRUE	TRUE	RIT1
chr1.155910934.155911029	ENSG00000143622	375	0.222923	0.374041	FALSE	FALSE	TRUE	TRUE	RIT1
chr1.155911295.155911536	ENSG00000143622	0	0.241307	0.042501	FALSE	FALSE	TRUE	TRUE	RIT1
chr1.155934125.155934732	ENSG00000132680	0	0.242358	0.258387	TRUE	FALSE	TRUE	TRUE	KHDC4
chr1.155976205.155978910	ENSG00000273002	0	0.70533	0.074761	TRUE	TRUE	TRUE	TRUE
chr1.155979148.155979381	ENSG00000273002	349	-0.406441	0.338104	FALSE	FALSE	TRUE	TRUE
chr1.155981290.155981430	ENSG00000273002	2491	0.300241	0.076671	TRUE	FALSE	TRUE	TRUE
chr1.156005064.156005185	ENSG00000116584	1885	-0.176744	0.497926	TRUE	TRUE	TRUE	TRUE	ARHGEF2
chr1.156020873.156021117	ENSG00000163479	0	0.479237	0.352602	FALSE	FALSE	TRUE	TRUE	SSR2
chr1.156052929.156055071	ENSG00000160803	0	0.134615	0.23823	FALSE	FALSE	TRUE	TRUE	UBQLN4
chr1.156052929.156055071	ENSG00000116586	0	-0.47883	0.38706	FALSE	FALSE	TRUE	TRUE	LAMTOR2
chr1.156082436.156082554	ENSG00000254726	-438	-0.382176	0.25066	FALSE	FALSE	TRUE	TRUE	MEX3A
chr1.156082436.156082554	ENSG00000160789	-19	-0.139668	0.353449	FALSE	FALSE	TRUE	TRUE	LMNA
chr1.156146070.156146290	ENSG00000196189	-1076	0.906373	0.0327749	TRUE	TRUE	TRUE	TRUE	SEMA4A
chr1.156193544.156194180	ENSG00000160785	0	-0.832161	0.0294247	TRUE	FALSE	TRUE	TRUE	SLC25A44
chr1.156212802.156213778	ENSG00000260238	0	-0.495082	0.0264501	FALSE	FALSE	TRUE	TRUE	PMF1-BGLAP
chr1.156212802.156213778	ENSG00000160783	0	-0.591554	0.132557	FALSE	FALSE	TRUE	TRUE	PMF1
chr1.156214448.156214657	ENSG00000260238	1466	0.815463	0.0208946	TRUE	TRUE	TRUE	TRUE	PMF1-BGLAP
chr1.156214448.156214657	ENSG00000160783	1455	0.833003	0.0402498	TRUE	TRUE	TRUE	TRUE	PMF1
chr1.156281385.156281583	ENSG00000198952	1242	0.978904	0.00103492	TRUE	FALSE	TRUE	TRUE	SMG5
chr1.156281385.156281583	ENSG00000163472	-1352	0.182522	0.462916	TRUE	FALSE	TRUE	TRUE	TMEM79
chr1.156281824.156281989	ENSG00000198952	836	0.932719	0.0388603	FALSE	FALSE	TRUE	TRUE	SMG5
chr1.156281824.156281989	ENSG00000163472	-946	0.0626093	0.481036	FALSE	FALSE	TRUE	TRUE	TMEM79
chr1.156282238.156283082	ENSG00000198952	0	-0.411908	0.256384	FALSE	FALSE	TRUE	TRUE	SMG5
chr1.156282238.156283082	ENSG00000163472	0	-0.456038	0.0322394	FALSE	FALSE	TRUE	TRUE	TMEM79
chr1.156499857.156501610	ENSG00000116604	0	0.898939	0.0456659	TRUE	TRUE	TRUE	TRUE	MEF2D
chr1.156501844.156501943	ENSG00000116604	-1016	0.031472	0.302827	FALSE	FALSE	TRUE	TRUE	MEF2D
chr1.156591440.156592238	ENSG00000163382	0	0.882503	0.042672	FALSE	FALSE	TRUE	TRUE	NAXE
chr1.156601361.156601712	ENSG00000160818	0	0.0515409	0.316286	FALSE	FALSE	TRUE	TRUE	GPATCH4
chr1.156706074.156706253	ENSG00000143320	-258	0.784615	0.0274716	FALSE	FALSE	TRUE	TRUE	CRABP2
chr1.156706438.156706610	ENSG00000143320	-622	0.723034	0.15418	TRUE	TRUE	TRUE	TRUE	CRABP2
chr1.156725894.156726077	ENSG00000143319	2722	-0.768353	0.112924	FALSE	FALSE	TRUE	TRUE	ISG20L2
chr1.156725894.156726077	ENSG00000143303	-2365	0.35514	0.273781	FALSE	FALSE	TRUE	TRUE	RRNAD1
chr1.156726746.156726845	ENSG00000143319	1954	0.700815	0.175768	FALSE	FALSE	TRUE	TRUE	ISG20L2
chr1.156726746.156726845	ENSG00000143303	-1597	-0.370811	0.29845	FALSE	FALSE	TRUE	TRUE	RRNAD1
chr1.156728023.156729301	ENSG00000143319	0	0.380789	0.31782	FALSE	FALSE	TRUE	TRUE	ISG20L2
chr1.156728023.156729301	ENSG00000143303	0	-0.0281016	0.232225	FALSE	FALSE	TRUE	TRUE	RRNAD1
chr1.156740616.156741520	ENSG00000143314	70	-0.388255	0.482191	FALSE	FALSE	TRUE	TRUE	MRPL24
chr1.156741852.156741972	ENSG00000143314	-262	0.881261	0.0554496	FALSE	FALSE	TRUE	TRUE	MRPL24
chr1.156750156.156752173	ENSG00000143294	0	-0.459674	0.0404935	TRUE	TRUE	TRUE	TRUE	PRCC
chr1.156766724.156768280	ENSG00000143321	0	-0.923596	0.00866047	TRUE	TRUE	TRUE	TRUE	HDGF
chr1.156768437.156768517	ENSG00000143321	-1512	0.511699	0.267908	FALSE	FALSE	TRUE	TRUE	HDGF
chr1.156813850.156814329	ENSG00000027869	2533	0.845137	0.0873422	FALSE	FALSE	TRUE	TRUE	SH2D2A
chr1.156813850.156814329	ENSG00000198400	-1311	0.717215	0.0474412	FALSE	FALSE	FALSE	FALSE	NTRK1
chr1.156814934.156815127	ENSG00000027869	1735	0.796913	0.0851113	TRUE	FALSE	TRUE	TRUE	SH2D2A
chr1.156814934.156815127	ENSG00000198400	-513	0.561174	0.153872	TRUE	FALSE	FALSE	FALSE	NTRK1
chr1.156816418.156817363	ENSG00000027869	0	0.120737	0.0346031	TRUE	TRUE	TRUE	TRUE	SH2D2A
chr1.156816418.156817363	ENSG00000198400	778	0.240383	0.110125	TRUE	TRUE	FALSE	FALSE	NTRK1
chr1.156892369.156892553	ENSG00000187800	-1145	-0.25565	0.203342	FALSE	FALSE	TRUE	TRUE	PEAR1
chr1.157138149.157139089	ENSG00000117036	0	0.393648	0.0776979	FALSE	FALSE	TRUE	TRUE	ETV3
chr1.157140239.157140340	ENSG00000117036	-1765	-0.691476	0.150899	TRUE	TRUE	TRUE	TRUE	ETV3
chr1.158930620.158930796	ENSG00000163564	0	0.556112	0.0468931	FALSE	FALSE	TRUE	TRUE	PYHIN1
chr1.158931468.158931622	ENSG00000163564	672	0.855372	0.0836093	FALSE	FALSE	TRUE	TRUE	PYHIN1
chr1.158932358.158932460	ENSG00000163564	1562	-0.852177	0.0390391	FALSE	FALSE	TRUE	TRUE	PYHIN1
chr1.158998142.158998297	ENSG00000163565	-1671	0.715293	0.0101234	TRUE	TRUE	TRUE	TRUE	IFI16
chr1.159780556.159781556	ENSG00000158716	0	-0.497657	0.362783	TRUE	TRUE	TRUE	TRUE	DUSP23
chr1.159854187.159854295	ENSG00000188004	1052	0.0199097	0.0899245	FALSE	FALSE	TRUE	TRUE
chr1.159854708.159855055	ENSG00000188004	292	0.416915	0.336376	TRUE	TRUE	TRUE	TRUE
chr1.159923273.159923990	ENSG00000158710	1742	-0.434574	0.542793	TRUE	FALSE	TRUE	TRUE	TAGLN2
chr1.159924215.159925947	ENSG00000158710	0	0.792566	0.123896	TRUE	TRUE	TRUE	TRUE	TAGLN2
chr1.160031274.160032185	ENSG00000143315	0	-0.837391	0.00290073	TRUE	FALSE	TRUE	TRUE	PIGM
chr1.160098161.160099386	ENSG00000162729	0	-0.244659	0.0998268	TRUE	TRUE	TRUE	TRUE	IGSF8
chr1.160101098.160101323	ENSG00000162729	-2155	-0.226147	0.201951	FALSE	FALSE	TRUE	TRUE	IGSF8
chr1.160205301.160205530	ENSG00000162734	0	-0.392142	0.30417	FALSE	FALSE	TRUE	FALSE	PEA15
chr1.160205844.160206271	ENSG00000227741	2598	0.632985	0.302956	TRUE	FALSE	TRUE	TRUE	LOC729867
chr1.160205844.160206271	ENSG00000162734	507	0.815927	0.0596968	TRUE	FALSE	TRUE	FALSE	PEA15
chr1.160261556.160263400	ENSG00000132716	0	-0.172392	0.0219708	FALSE	FALSE	TRUE	TRUE	DCAF8
chr1.160261556.160263400	ENSG00000228606	0	-0.45618	0.0138023	FALSE	FALSE	TRUE	TRUE	LOC100287049
chr1.160285049.160285287	ENSG00000258465	0	-0.1483	0.245206	FALSE	FALSE	FALSE	FALSE
chr1.160285049.160285287	ENSG00000162735	1061	0.580431	0.122109	FALSE	FALSE	FALSE	FALSE	PEX19
chr1.160343186.160343642	ENSG00000122218	0	-0.293468	0.32533	FALSE	FALSE	TRUE	TRUE	COPA
chr1.160343186.160343642	ENSG00000162736	0	0.282183	0.403099	FALSE	FALSE	TRUE	TRUE	NCSTN
chr1.160519581.160520325	ENSG00000162739	2937	0.732687	0.142824	TRUE	TRUE	TRUE	TRUE	SLAMF6
chr1.160521009.160521293	ENSG00000162739	1969	0.897427	0.0080668	FALSE	FALSE	TRUE	TRUE	SLAMF6
chr1.160522954.160523346	ENSG00000162739	0	-0.643868	0.00534708	TRUE	TRUE	TRUE	TRUE	SLAMF6
chr1.160576382.160577351	ENSG00000066294	2165	0.516246	0.133708	TRUE	FALSE	TRUE	FALSE	CD84
chr1.160577746.160577987	ENSG00000066294	1529	0.438667	0.0595803	FALSE	FALSE	TRUE	FALSE	CD84
chr1.160578866.160579011	ENSG00000066294	505	0.703229	0.228497	TRUE	TRUE	TRUE	FALSE	CD84
chr1.160579214.160579596	ENSG00000066294	0	0.475712	0.10829	TRUE	TRUE	TRUE	FALSE	CD84
chr1.160645932.160646011	ENSG00000117090	1284	0.35292	0.489422	FALSE	FALSE	TRUE	TRUE	SLAMF1
chr1.160646962.160647307	ENSG00000117090	0	0.603853	0.143027	TRUE	TRUE	TRUE	TRUE	SLAMF1
chr1.160672825.160673332	ENSG00000235101	2677	0.0064495	0.276589	TRUE	TRUE	TRUE	TRUE
chr1.160672825.160673332	ENSG00000228863	2047	0.409011	0.020073	TRUE	TRUE	TRUE	TRUE
chr1.160708923.160709270	ENSG00000117091	2581	-0.0611941	0.459108	FALSE	FALSE	FALSE	FALSE	CD48
chr1.160710648.160710799	ENSG00000117091	1052	-0.0450651	0.920968	FALSE	FALSE	FALSE	FALSE	CD48
chr1.160710999.160711353	ENSG00000117091	498	-0.464039	0.261617	FALSE	FALSE	FALSE	FALSE	CD48
chr1.160711607.160712580	ENSG00000117091	0	-0.00311999	0.82871	TRUE	TRUE	FALSE	FALSE	CD48
chr1.160712782.160713044	ENSG00000117091	-931	0.0270708	0.606098	FALSE	FALSE	FALSE	FALSE	CD48
chr1.160714351.160714650	ENSG00000117091	-2500	0.0684085	0.80699	TRUE	TRUE	FALSE	FALSE	CD48
chr1.160739148.160739327	ENSG00000026751	91	0.881587	0.0349188	TRUE	FALSE	TRUE	FALSE	SLAMF7
chr1.160795808.160796494	ENSG00000122224	0	0.810436	0.0190553	TRUE	TRUE	TRUE	TRUE	LY9
chr1.160797247.160797343	ENSG00000122224	1173	0.0848217	0.380816	FALSE	FALSE	TRUE	TRUE	LY9
chr1.160798016.160798286	ENSG00000122224	1942	0.935624	0.00989114	TRUE	TRUE	TRUE	TRUE	LY9
chr1.161020846.161021531	ENSG00000158769	0	0.834824	0.0371553	TRUE	TRUE	TRUE	TRUE	F11R
chr1.161038696.161039134	ENSG00000270149	0	0.686464	0.186238	TRUE	TRUE	TRUE	TRUE
chr1.161038696.161039134	ENSG00000215845	0	0.848272	0.0874959	TRUE	TRUE	TRUE	TRUE	TSTD1
chr1.161041565.161041744	ENSG00000270149	-2603	0.133891	0.28239	FALSE	FALSE	TRUE	TRUE
chr1.161041565.161041744	ENSG00000215845	-2575	0.78852	0.186872	FALSE	FALSE	TRUE	TRUE	TSTD1
chr1.161044970.161046370	ENSG00000158773	0	0.781131	0.130003	TRUE	TRUE	TRUE	TRUE	USF1
chr1.161066827.161067033	ENSG00000186517	2937	-0.47538	0.150186	TRUE	FALSE	TRUE	TRUE	ARHGAP30
chr1.161068222.161068872	ENSG00000186517	1098	0.766936	0.119096	TRUE	TRUE	TRUE	TRUE	ARHGAP30
chr1.161069260.161069569	ENSG00000186517	401	0.714835	0.102952	FALSE	FALSE	TRUE	TRUE	ARHGAP30
chr1.161069787.161070455	ENSG00000186517	0	0.849944	0.00267488	TRUE	FALSE	TRUE	TRUE	ARHGAP30
chr1.161070905.161071007	ENSG00000186517	-935	-0.650332	0.0283521	FALSE	FALSE	TRUE	TRUE	ARHGAP30
chr1.161115343.161115668	ENSG00000143256	2443	0.87705	0.0112354	TRUE	FALSE	TRUE	TRUE	PFDN2
chr1.161115343.161115668	ENSG00000158793	-2418	0.765005	0.0696085	TRUE	FALSE	TRUE	TRUE	NIT1
chr1.161117441.161118386	ENSG00000143256	0	0.878261	0.0359514	TRUE	FALSE	TRUE	TRUE	PFDN2
chr1.161117441.161118386	ENSG00000158793	0	0.66014	0.210149	TRUE	FALSE	TRUE	TRUE	NIT1
chr1.161119723.161120169	ENSG00000143256	-1612	0.979327	0.0138612	TRUE	TRUE	TRUE	TRUE	PFDN2
chr1.161119723.161120169	ENSG00000158793	1637	0.853987	0.0518113	TRUE	TRUE	TRUE	TRUE	NIT1
chr1.161131783.161131870	ENSG00000158796	818	0.39794	0.084288	FALSE	FALSE	TRUE	TRUE	DEDD
chr1.161132201.161132992	ENSG00000158796	0	-0.574437	0.0378144	TRUE	FALSE	TRUE	TRUE	DEDD
chr1.161133211.161133320	ENSG00000158796	-523	0.2522	0.0831031	FALSE	FALSE	TRUE	TRUE	DEDD
chr1.161153744.161154305	ENSG00000143222	968	-0.0693207	0.353427	TRUE	FALSE	FALSE	FALSE	UFC1
chr1.161159339.161159762	ENSG00000143258	0	0.449408	0.447017	TRUE	TRUE	TRUE	TRUE	USP21
chr1.161165733.161166665	ENSG00000143224	0	0.725842	0.0340928	FALSE	FALSE	TRUE	TRUE	PPOX
chr1.161176983.161177901	ENSG00000158850	67	0.121835	0.0457381	FALSE	FALSE	TRUE	TRUE	B4GALT3
chr1.161201924.161202481	ENSG00000158859	-2868	0.21744	0.594906	TRUE	TRUE	FALSE	FALSE	ADAMTS4
chr1.161225450.161226348	ENSG00000158882	0	-0.238262	0.389136	FALSE	FALSE	TRUE	FALSE	TOMM40L
chr1.161227460.161227659	ENSG00000158882	1521	-0.242145	0.0140484	FALSE	FALSE	TRUE	FALSE	TOMM40L
chr1.161314211.161314656	ENSG00000143252	0	-0.696088	0.187846	TRUE	FALSE	TRUE	TRUE	SDHC
chr1.161399016.161400463	ENSG00000283696	0	-0.0150085	0.38912	FALSE	FALSE	FALSE	FALSE
chr1.161523845.161523936	ENSG00000173110	-604	-0.327208	0.146366	FALSE	FALSE	FALSE	FALSE	HSPA6
chr1.161524131.161524291	ENSG00000173110	-249	0.0602164	0.652369	FALSE	FALSE	FALSE	FALSE	HSPA6
chr1.161749614.161750481	ENSG00000081721	0	0.700108	0.0553032	TRUE	FALSE	TRUE	TRUE	DUSP12
chr1.161766152.161766594	ENSG00000118217	0	0.38396	0.0340046	FALSE	FALSE	TRUE	TRUE	ATF6
chr1.162023826.162024019	ENSG00000162745	0	0.913694	0.0463135	TRUE	TRUE	FALSE	FALSE	OLFML2B
chr1.162024327.162024474	ENSG00000162745	-473	0.68626	0.0505366	FALSE	FALSE	FALSE	FALSE	OLFML2B
chr1.162497614.162498278	ENSG00000152332	363	-0.452842	0.368001	FALSE	FALSE	FALSE	FALSE	UHMK1
chr1.162561104.162562060	ENSG00000117143	0	-0.0372571	0.57238	TRUE	FALSE	TRUE	TRUE	UAP1
chr1.162790365.162791028	ENSG00000132196	0	-0.167541	0.668443	FALSE	FALSE	TRUE	TRUE	HSD17B7
chr1.163321677.163322271	ENSG00000143248	0	0.852968	0.0873046	FALSE	FALSE	FALSE	FALSE	RGS5
chr1.163321677.163322271	ENSG00000232995	0	0.866873	0.087303	FALSE	FALSE	FALSE	FALSE	RGS5
chr1.165630630.165631482	ENSG00000143198	0	0.906867	0.0407739	TRUE	TRUE	TRUE	TRUE	MGST3
chr1.165631960.165632178	ENSG00000143198	1099	-0.891809	0.0221401	TRUE	FALSE	TRUE	TRUE	MGST3
chr1.165633693.165633892	ENSG00000143198	2832	-0.746279	0.141114	TRUE	TRUE	TRUE	TRUE	MGST3
chr1.165697870.165698810	ENSG00000143149	53	-0.147558	0.270195	FALSE	FALSE	FALSE	FALSE	ALDH9A1
chr1.165827412.165828525	ENSG00000143183	0	0.539314	0.423743	TRUE	TRUE	TRUE	TRUE	TMCO1
chr1.165827412.165828525	ENSG00000143179	0	0.960471	0.0297942	TRUE	TRUE	TRUE	TRUE	UCK2
chr1.166839064.166840038	ENSG00000143157	0	0.705005	0.0593065	FALSE	FALSE	TRUE	TRUE	POGK
chr1.166875701.166876792	ENSG00000152382	0	-0.59342	0.0446348	FALSE	FALSE	TRUE	TRUE	TADA1
chr1.166974905.166975083	ENSG00000143195	399	0.755213	0.183407	TRUE	TRUE	TRUE	TRUE	ILDR2
chr1.166975372.166975586	ENSG00000143195	0	-0.166661	0.456422	FALSE	FALSE	TRUE	TRUE	ILDR2
chr1.166975800.166976104	ENSG00000143195	-318	0.79203	0.00714157	TRUE	FALSE	TRUE	TRUE	ILDR2
chr1.167219823.167221418	ENSG00000143190	0	0.732782	0.0251825	TRUE	TRUE	FALSE	FALSE	POU2F1
chr1.167222016.167222606	ENSG00000143190	1187	-0.547829	0.220588	TRUE	TRUE	FALSE	FALSE	POU2F1
chr1.167515582.167515719	ENSG00000198821	2891	-0.281989	0.498724	FALSE	FALSE	TRUE	TRUE	CD247
chr1.167516555.167517304	ENSG00000198821	1306	0.810968	0.0860012	TRUE	FALSE	TRUE	TRUE	CD247
chr1.167516555.167517304	ENSG00000227776	-2232	0.695458	0.0221826	TRUE	FALSE	TRUE	TRUE
chr1.167517541.167518753	ENSG00000198821	0	0.741866	0.158477	FALSE	FALSE	TRUE	TRUE	CD247
chr1.167517541.167518753	ENSG00000227776	-783	0.522431	0.199027	FALSE	FALSE	TRUE	TRUE
chr1.167553299.167554145	ENSG00000143162	0	-0.108989	0.201186	TRUE	TRUE	FALSE	FALSE	CREG1
chr1.167627952.167628571	ENSG00000198771	-1522	0.215312	0.420997	TRUE	TRUE	TRUE	TRUE	RCSD1
chr1.167630160.167630321	ENSG00000198771	67	0.438396	0.462381	FALSE	FALSE	TRUE	TRUE	RCSD1
chr1.167630760.167631157	ENSG00000198771	667	-0.713256	0.0956735	FALSE	FALSE	TRUE	TRUE	RCSD1
chr1.167631985.167632126	ENSG00000198771	1892	0.932727	0.0477423	TRUE	FALSE	TRUE	TRUE	RCSD1
chr1.167632423.167632584	ENSG00000198771	2330	0.838073	0.0183695	TRUE	TRUE	TRUE	TRUE	RCSD1
chr1.167721617.167722659	ENSG00000197965	425	0.0096717	0.309787	FALSE	FALSE	TRUE	TRUE	MPZL1
chr1.167935442.167937327	ENSG00000143158	0	0.30357	0.0911147	TRUE	TRUE	TRUE	TRUE	MPC2
chr1.167935442.167937327	ENSG00000143164	0	0.0878325	0.0425477	TRUE	TRUE	FALSE	FALSE	DCAF6
chr1.167937492.167937638	ENSG00000143158	-452	-0.656015	0.0835355	FALSE	FALSE	TRUE	TRUE	MPC2
chr1.167937492.167937638	ENSG00000143164	1709	-0.490053	0.0947185	FALSE	FALSE	FALSE	FALSE	DCAF6
chr1.168178663.168179613	ENSG00000143155	0	0.503239	0.110729	FALSE	FALSE	TRUE	TRUE	TIPRL
chr1.168225659.168226111	ENSG00000213064	0	0.685286	0.019805	FALSE	FALSE	TRUE	TRUE	SFT2D2
chr1.169106118.169106780	ENSG00000143153	421	-0.0326556	0.00338274	FALSE	FALSE	TRUE	TRUE	ATP1B1
chr1.169367522.169368329	ENSG00000143156	0	-0.937786	0.0174199	TRUE	TRUE	TRUE	TRUE	NME7
chr1.169367522.169368329	ENSG00000117475	0	0.386215	0.359989	TRUE	TRUE	TRUE	TRUE	BLZF1
chr1.169368525.169368667	ENSG00000143156	-558	0.71426	0.249344	FALSE	FALSE	TRUE	TRUE	NME7
chr1.169368525.169368667	ENSG00000117475	555	0.254297	0.104226	FALSE	FALSE	TRUE	TRUE	BLZF1
chr1.169485265.169486383	ENSG00000117479	0	-0.459548	0.326687	FALSE	FALSE	TRUE	TRUE	SLC19A2
chr1.169584656.169585635	ENSG00000198734	953	0.901651	0.0539291	TRUE	FALSE	TRUE	FALSE	F5
chr1.169586205.169586610	ENSG00000198734	0	0.857793	0.0825161	TRUE	TRUE	TRUE	FALSE	F5
chr1.169589186.169589356	ENSG00000198734	-2598	0.950022	0.0341069	TRUE	FALSE	TRUE	FALSE	F5
chr1.169708795.169708967	ENSG00000188404	2731	0.349715	0.235225	TRUE	TRUE	TRUE	FALSE	SELL
chr1.169711079.169711178	ENSG00000188404	520	0.235222	0.267279	FALSE	FALSE	TRUE	FALSE	SELL
chr1.169711365.169711846	ENSG00000188404	0	-0.266554	0.271415	TRUE	TRUE	TRUE	FALSE	SELL
chr1.169712100.169712311	ENSG00000188404	-402	0.54674	0.0406024	FALSE	FALSE	TRUE	FALSE	SELL
chr1.169794447.169795327	ENSG00000171806	0	0.499621	0.109618	FALSE	FALSE	FALSE	FALSE	METTL18
chr1.169890908.169891611	ENSG00000000457	2656	-0.119776	0.6475	TRUE	FALSE	TRUE	TRUE	SCYL3
chr1.169893218.169894451	ENSG00000000457	0	0.614356	0.16316	TRUE	TRUE	TRUE	TRUE	SCYL3
chr1.170531601.170532485	ENSG00000120370	0	0.238647	0.111615	TRUE	TRUE	TRUE	TRUE	GORAB
chr1.171313898.171314259	ENSG00000076258	0	-0.00460244	0.0298529	FALSE	FALSE	TRUE	TRUE	FMO4
chr1.171484913.171486465	ENSG00000117523	0	0.423258	0.0510132	FALSE	FALSE	FALSE	FALSE	PRRC2C
chr1.171741396.171741553	ENSG00000117533	694	-0.101042	0.107538	FALSE	FALSE	TRUE	TRUE	VAMP4
chr1.171741816.171743378	ENSG00000117533	0	0.89717	0.092066	TRUE	TRUE	TRUE	TRUE	VAMP4
chr1.171743537.171743641	ENSG00000117533	-1290	0.411864	0.0699225	FALSE	FALSE	TRUE	TRUE	VAMP4
chr1.171781067.171781782	ENSG00000010165	0	-0.58494	0.0956655	TRUE	TRUE	TRUE	TRUE	EEF1AKNMT
chr1.171782040.171782123	ENSG00000010165	376	0.464525	0.049593	FALSE	FALSE	TRUE	TRUE	EEF1AKNMT
chr1.171841330.171841610	ENSG00000197959	0	0.143698	0.303221	FALSE	FALSE	TRUE	TRUE	DNM3
chr1.172443667.172444247	ENSG00000135845	0	0.16499	0.549402	FALSE	FALSE	TRUE	TRUE	PIGC
chr1.172532133.172534153	ENSG00000094975	0	0.830739	0.0871258	TRUE	TRUE	TRUE	TRUE	SUCO
chr1.172658824.172659613	ENSG00000117560	0	0.739342	0.0597774	TRUE	FALSE	TRUE	FALSE	FASLG
chr1.172661481.172661674	ENSG00000117560	2463	0.922506	0.0706806	TRUE	FALSE	TRUE	FALSE	FASLG
chr1.173205605.173206039	ENSG00000117586	1274	0.361991	0.446097	TRUE	TRUE	FALSE	FALSE	TNFSF4
chr1.173475829.173476015	ENSG00000117592	-1251	0.603766	0.328976	TRUE	FALSE	TRUE	TRUE	PRDX6
chr1.173476588.173477713	ENSG00000117592	0	-0.420127	0.373485	FALSE	FALSE	TRUE	TRUE	PRDX6
chr1.173714782.173715558	ENSG00000076321	0	0.822248	0.0395686	TRUE	FALSE	FALSE	FALSE	KLHL20
chr1.173824095.173825052	ENSG00000120334	0	-0.478569	0.11518	FALSE	FALSE	TRUE	TRUE	CENPL
chr1.173824095.173825052	ENSG00000117593	0	-0.756966	0.111638	FALSE	FALSE	TRUE	TRUE	DARS2
chr1.173825218.173825290	ENSG00000120334	-498	0.160389	0.103238	FALSE	FALSE	TRUE	TRUE	CENPL
chr1.173825218.173825290	ENSG00000117593	715	0.484538	0.00906291	FALSE	FALSE	TRUE	TRUE	DARS2
chr1.173866540.173866665	ENSG00000234741	2217	-0.832808	0.101672	FALSE	FALSE	TRUE	TRUE	GAS5
chr1.173866540.173866665	ENSG00000185278	-1417	-0.610617	0.0639789	FALSE	FALSE	TRUE	TRUE	ZBTB37
chr1.173866952.173867056	ENSG00000234741	1826	-0.85447	0.00380724	FALSE	FALSE	TRUE	TRUE	GAS5
chr1.173866952.173867056	ENSG00000185278	-1026	-0.76105	0.0122954	FALSE	FALSE	TRUE	TRUE	ZBTB37
chr1.173867216.173868992	ENSG00000234741	0	0.963349	0.0360505	FALSE	FALSE	TRUE	TRUE	GAS5
chr1.173867216.173868992	ENSG00000185278	0	0.824476	0.051039	FALSE	FALSE	TRUE	TRUE	ZBTB37
chr1.173869158.173869257	ENSG00000234741	-276	0.488904	0.157228	FALSE	FALSE	TRUE	TRUE	GAS5
chr1.173869158.173869257	ENSG00000185278	1076	0.492485	0.357546	FALSE	FALSE	TRUE	TRUE	ZBTB37
chr1.174021601.174022609	ENSG00000135870	0	0.361625	0.561321	FALSE	FALSE	TRUE	TRUE	RC3H1
chr1.174022843.174022968	ENSG00000135870	-546	0.108862	0.00897497	FALSE	FALSE	TRUE	TRUE	RC3H1
chr1.174157244.174157508	ENSG00000152061	-1902	-0.913501	0.0354815	TRUE	FALSE	TRUE	FALSE	RABGAP1L
chr1.174158825.174160087	ENSG00000152061	0	0.856845	0.00915221	TRUE	FALSE	TRUE	FALSE	RABGAP1L
chr1.174998561.175000711	ENSG00000116161	0	-0.937392	0.0202982	TRUE	TRUE	TRUE	TRUE	CACYBP
chr1.175000880.175001051	ENSG00000116161	1717	0.846396	0.055726	TRUE	TRUE	TRUE	TRUE	CACYBP
chr1.175023060.175023720	ENSG00000120333	0	0.219141	0.458803	TRUE	TRUE	FALSE	FALSE	MRPS14
chr1.175191849.175192008	ENSG00000235750	991	-0.097068	0.557174	FALSE	FALSE	FALSE	FALSE	KIAA0040
chr1.175192353.175192478	ENSG00000235750	521	-0.193979	0.151374	FALSE	FALSE	FALSE	FALSE	KIAA0040
chr1.175192715.175193218	ENSG00000235750	0	-0.560076	0.139594	FALSE	FALSE	FALSE	FALSE	KIAA0040
chr1.176206612.176207850	ENSG00000143207	0	-0.528863	0.288814	TRUE	FALSE	TRUE	TRUE	COP1
chr1.178725063.178726039	ENSG00000116191	0	0.844318	0.0346375	FALSE	FALSE	TRUE	TRUE	RALGPS2
chr1.178726282.178726541	ENSG00000116191	1135	0.926856	0.0109798	TRUE	TRUE	TRUE	TRUE	RALGPS2
chr1.179025671.179026826	ENSG00000116199	0	-0.696626	0.0199597	FALSE	FALSE	TRUE	TRUE	FAM20B
chr1.179080944.179081162	ENSG00000186283	-215	-0.464907	0.0573604	TRUE	TRUE	TRUE	FALSE	TOR3A
chr1.179081368.179082776	ENSG00000186283	0	0.799214	0.0577477	FALSE	FALSE	TRUE	FALSE	TOR3A
chr1.179228507.179228658	ENSG00000143322	1026	-0.279698	0.106226	TRUE	FALSE	TRUE	TRUE	ABL2
chr1.179229586.179229808	ENSG00000143322	0	0.693069	0.101999	FALSE	FALSE	TRUE	TRUE	ABL2
chr1.179230413.179230627	ENSG00000143322	-729	0.601626	0.130146	TRUE	FALSE	TRUE	TRUE	ABL2
chr1.179293419.179294368	ENSG00000057252	0	-0.478941	0.0242124	FALSE	FALSE	TRUE	TRUE	SOAT1
chr1.179294938.179295396	ENSG00000057252	1224	0.551361	0.0942392	TRUE	FALSE	TRUE	TRUE	SOAT1
chr1.179877718.179877963	ENSG00000169905	0	-0.753878	0.108558	FALSE	FALSE	TRUE	TRUE	TOR1AIP2
chr1.179882021.179883452	ENSG00000272906	0	0.883408	0.013948	TRUE	FALSE	TRUE	TRUE
chr1.179882021.179883452	ENSG00000143337	0	0.264975	0.321349	TRUE	FALSE	FALSE	FALSE	TOR1AIP1
chr1.179883699.179884080	ENSG00000272906	-1104	-0.215405	0.0276065	TRUE	FALSE	TRUE	TRUE
chr1.179883699.179884080	ENSG00000143337	1657	0.105034	0.464865	TRUE	FALSE	FALSE	FALSE	TOR1AIP1
chr1.179953721.179955457	ENSG00000135837	0	0.917333	0.02938	TRUE	TRUE	FALSE	FALSE	CEP350
chr1.180154413.180155137	ENSG00000116260	0	-0.395403	0.215265	FALSE	FALSE	TRUE	TRUE	QSOX1
chr1.180502123.180503252	ENSG00000230124	0	0.303826	0.538992	FALSE	FALSE	TRUE	TRUE	ACBD6
chr1.180631771.180632753	ENSG00000143324	0	-0.854219	0.119184	FALSE	FALSE	TRUE	TRUE	XPR1
chr1.181021885.181023305	ENSG00000135823	0	0.921982	0.00734895	FALSE	FALSE	TRUE	TRUE	STX6
chr1.181033207.181033303	ENSG00000153029	-122	-0.0153825	0.0692688	FALSE	FALSE	FALSE	FALSE	MR1
chr1.181033797.181034067	ENSG00000153029	372	0.298466	0.39283	TRUE	TRUE	FALSE	FALSE	MR1
chr1.181088446.181090402	ENSG00000162783	0	0.275294	0.0511401	TRUE	TRUE	TRUE	TRUE	IER5
chr1.181090812.181091035	ENSG00000162783	2100	0.0739291	0.47724	FALSE	FALSE	TRUE	TRUE	IER5
chr1.182391244.182392009	ENSG00000135821	197	0.320285	0.399646	FALSE	FALSE	FALSE	FALSE	GLUL
chr1.182392311.182392389	ENSG00000135821	-105	-0.0586517	0.0145159	FALSE	FALSE	FALSE	FALSE	GLUL
chr1.182588792.182588984	ENSG00000135828	272	-0.62773	0.171381	FALSE	FALSE	TRUE	TRUE	RNASEL
chr1.182589189.182589359	ENSG00000135828	0	0.530938	0.107091	FALSE	FALSE	TRUE	TRUE	RNASEL
chr1.182601506.182601609	ENSG00000143333	2799	-0.210158	0.000228467	FALSE	FALSE	TRUE	TRUE	RGS16
chr1.182603367.182604852	ENSG00000143333	0	0.668782	0.278561	FALSE	FALSE	TRUE	TRUE	RGS16
chr1.182789205.182790021	ENSG00000135838	0	-0.767401	0.127445	FALSE	FALSE	FALSE	FALSE	NPL
chr1.182838893.182840216	ENSG00000135829	0	-0.830869	0.148878	TRUE	FALSE	TRUE	TRUE	DHX9
chr1.183470133.183470557	ENSG00000232860	1708	0.885905	0.105925	TRUE	TRUE	TRUE	TRUE	SMG7-AS1
chr1.183470133.183470557	ENSG00000116698	-1659	0.623967	0.00717683	TRUE	TRUE	FALSE	FALSE	SMG7
chr1.183471020.183473172	ENSG00000232860	0	0.913696	0.0646938	TRUE	TRUE	TRUE	TRUE	SMG7-AS1
chr1.183471020.183473172	ENSG00000116698	0	0.785742	0.212945	TRUE	TRUE	FALSE	FALSE	SMG7
chr1.183633663.183634031	ENSG00000162704	1726	-0.683056	0.243099	TRUE	FALSE	TRUE	TRUE	ARPC5
chr1.183633663.183634031	ENSG00000143344	-2054	0.270647	0.227706	TRUE	FALSE	FALSE	FALSE	RGL1
chr1.183635133.183636385	ENSG00000162704	0	-0.754267	0.112059	FALSE	FALSE	TRUE	TRUE	ARPC5
chr1.183635133.183636385	ENSG00000143344	0	0.881866	0.0847148	FALSE	FALSE	FALSE	FALSE	RGL1
chr1.184037312.184037411	ENSG00000198756	318	-0.561194	0.103972	FALSE	FALSE	TRUE	TRUE	COLGALT2
chr1.184051314.184052210	ENSG00000198860	0	0.32585	0.171261	TRUE	FALSE	TRUE	TRUE	TSEN15
chr1.184386849.184387073	ENSG00000116667	0	-0.929408	0.0313421	FALSE	FALSE	TRUE	TRUE	C1orf21
chr1.184387540.184387753	ENSG00000116667	482	0.399397	0.300218	FALSE	FALSE	TRUE	TRUE	C1orf21
chr1.184754141.184755946	ENSG00000116406	0	0.251648	0.286237	FALSE	FALSE	FALSE	FALSE	EDEM3
chr1.184973506.184974636	ENSG00000135842	0	-0.0999249	0.340366	TRUE	FALSE	FALSE	FALSE	NIBAN1
chr1.185045106.185046071	ENSG00000121481	0	-0.223499	0.268728	FALSE	FALSE	FALSE	TRUE	RNF2
chr1.185156023.185157923	ENSG00000121486	0	0.0221903	0.53367	FALSE	FALSE	TRUE	TRUE	TRMT1L
chr1.185156023.185157923	ENSG00000116668	0	0.648098	0.0819954	FALSE	FALSE	TRUE	TRUE	SWT1
chr1.185316041.185316930	ENSG00000116679	399	0.270091	0.134306	FALSE	FALSE	TRUE	TRUE	IVNS1ABP
chr1.185317118.185318216	ENSG00000116679	0	0.924399	0.00259237	TRUE	FALSE	TRUE	TRUE	IVNS1ABP
chr1.186374513.186376211	ENSG00000047410	0	-0.371245	0.0626203	FALSE	FALSE	FALSE	FALSE	TPR
chr1.186374513.186376211	ENSG00000157181	0	0.0725764	0.0428234	FALSE	FALSE	TRUE	TRUE	ODR4
chr1.186680267.186680462	ENSG00000073756	0	0.282867	0.157744	TRUE	TRUE	TRUE	TRUE	PTGS2
chr1.186828903.186828992	ENSG00000116711	0	0.00657834	0.619029	FALSE	FALSE	FALSE	FALSE	PLA2G4A
chr1.192575460.192575841	ENSG00000090104	0	0.808787	0.0633342	TRUE	TRUE	TRUE	TRUE	RGS1
chr1.192805925.192806098	ENSG00000116741	-2941	0.0914336	0.0178269	FALSE	FALSE	TRUE	TRUE	RGS2
chr1.192807365.192807585	ENSG00000116741	-1454	-0.965269	0.00898141	TRUE	TRUE	TRUE	TRUE	RGS2
chr1.192808444.192809756	ENSG00000116741	0	0.566344	0.217823	FALSE	FALSE	TRUE	TRUE	RGS2
chr1.193058498.193060136	ENSG00000116750	0	0.54562	0.102342	FALSE	FALSE	TRUE	TRUE	UCHL5
chr1.193058498.193060136	ENSG00000116747	0	0.236706	0.709454	FALSE	FALSE	FALSE	TRUE	RO60
chr1.193104561.193104679	ENSG00000023572	1435	0.31308	0.0433302	FALSE	FALSE	TRUE	TRUE	GLRX2
chr1.193104972.193105744	ENSG00000023572	370	0.537213	0.192673	FALSE	FALSE	TRUE	TRUE	GLRX2
chr1.193121488.193122707	ENSG00000134371	0	0.37792	0.172049	TRUE	FALSE	FALSE	FALSE	CDC73
chr1.197146404.197147080	ENSG00000066279	0	0.791754	0.0700397	TRUE	TRUE	TRUE	TRUE	ASPM
chr1.197200550.197201812	ENSG00000177888	-8	0.437969	0.16742	FALSE	FALSE	TRUE	TRUE	ZBTB41
chr1.197202017.197202212	ENSG00000177888	-1475	-0.548675	0.218951	FALSE	FALSE	TRUE	TRUE	ZBTB41
chr1.197774699.197777004	ENSG00000213047	0	-0.706827	0.156863	TRUE	TRUE	TRUE	TRUE	DENND1B
chr1.198156205.198156403	ENSG00000151414	-560	-0.389557	0.132377	FALSE	FALSE	TRUE	TRUE	NEK7
chr1.198156556.198157797	ENSG00000151414	0	0.0470588	0.522566	FALSE	FALSE	TRUE	TRUE	NEK7
chr1.198157949.198158216	ENSG00000151414	986	0.21953	0.544466	TRUE	TRUE	TRUE	TRUE	NEK7
chr1.198158408.198158534	ENSG00000151414	1445	0.178344	0.441102	FALSE	FALSE	TRUE	TRUE	NEK7
chr1.198158798.198159505	ENSG00000151414	1835	0.320735	0.420326	FALSE	FALSE	TRUE	TRUE	NEK7
chr1.198638914.198639177	ENSG00000081237	243	0.279197	0.252388	TRUE	TRUE	TRUE	TRUE	PTPRC
chr1.198639965.198640056	ENSG00000081237	1294	0.766359	0.0844635	TRUE	FALSE	TRUE	TRUE	PTPRC
chr1.198641536.198642215	ENSG00000081237	2865	-0.436897	0.0277546	TRUE	FALSE	TRUE	TRUE	PTPRC
chr1.200409599.200410397	ENSG00000162702	0	-0.157296	0.251927	FALSE	FALSE	FALSE	FALSE	ZNF281
chr1.200620676.200620963	ENSG00000118193	0	0.721936	0.21025	FALSE	FALSE	TRUE	TRUE	KIF14
chr1.200669313.200670456	ENSG00000118197	0	-0.42311	0.260901	FALSE	FALSE	FALSE	FALSE	DDX59
chr1.200738680.200739581	ENSG00000118200	0	0.215242	0.0126058	TRUE	FALSE	TRUE	TRUE	CAMSAP2
chr1.201021093.201021257	ENSG00000116852	2443	0.2514	0.207092	FALSE	FALSE	TRUE	TRUE	KIF21B
chr1.201022928.201023099	ENSG00000116852	601	0.0737625	0.128912	FALSE	FALSE	TRUE	TRUE	KIF21B
chr1.201023547.201023903	ENSG00000116852	0	0.801164	0.055428	FALSE	FALSE	TRUE	TRUE	KIF21B
chr1.201170588.201171094	ENSG00000116857	480	-0.0467457	0.0935851	TRUE	TRUE	TRUE	TRUE	TMEM9
chr1.201171266.201171630	ENSG00000116857	0	-0.386464	0.201037	TRUE	FALSE	TRUE	TRUE	TMEM9
chr1.201506988.201507321	ENSG00000159176	2135	0.345496	0.0517077	FALSE	FALSE	TRUE	TRUE	CSRP1
chr1.201506988.201507321	ENSG00000224536	0	0.261852	0.251526	FALSE	FALSE	FALSE	FALSE	LOC107985246
chr1.201828966.201829651	ENSG00000198700	0	-0.398831	0.355809	FALSE	FALSE	TRUE	TRUE	IPO9
chr1.201955168.201955806	ENSG00000134375	0	0.757721	0.0678919	FALSE	FALSE	TRUE	TRUE	TIMM17A
chr1.201982481.201983254	ENSG00000176393	109	0.663453	0.21572	TRUE	TRUE	TRUE	FALSE	RNPEP
chr1.202144237.202144403	ENSG00000143862	340	0.641776	0.21497	FALSE	FALSE	FALSE	FALSE	ARL8A
chr1.202144637.202144861	ENSG00000143862	0	-0.0219352	0.721695	FALSE	FALSE	FALSE	FALSE	ARL8A
chr1.202145542.202145675	ENSG00000143862	-799	0.276379	0.29275	TRUE	TRUE	FALSE	FALSE	ARL8A
chr1.202159798.202160781	ENSG00000143851	807	0.388565	0.1026	FALSE	FALSE	TRUE	TRUE	PTPN7
chr1.202162094.202162285	ENSG00000143851	-506	0.598913	0.315583	FALSE	FALSE	TRUE	TRUE	PTPN7
chr1.202162959.202163072	ENSG00000143851	-1371	0.561041	0.0873768	FALSE	FALSE	TRUE	TRUE	PTPN7
chr1.202341463.202342220	ENSG00000077152	0	0.259573	0.0590562	FALSE	FALSE	TRUE	TRUE	UBE2T
chr1.202348412.202348993	ENSG00000077157	0	0.612638	0.027649	FALSE	FALSE	TRUE	TRUE	PPP1R12B
chr1.202349438.202349529	ENSG00000077157	739	0.11951	0.0644581	FALSE	FALSE	TRUE	TRUE	PPP1R12B
chr1.202806175.202806478	ENSG00000117139	2992	0.352988	0.309429	TRUE	FALSE	TRUE	TRUE	KDM5B
chr1.202807032.202807290	ENSG00000117139	2180	0.431816	0.361025	FALSE	FALSE	TRUE	TRUE	KDM5B
chr1.202807598.202807791	ENSG00000117139	1679	0.657222	0.0300062	TRUE	FALSE	TRUE	TRUE	KDM5B
chr1.202807992.202808188	ENSG00000117139	1282	0.874652	0.0897601	FALSE	FALSE	TRUE	TRUE	KDM5B
chr1.202810703.202811155	ENSG00000117139	-1233	-0.2626	0.161438	TRUE	FALSE	TRUE	TRUE	KDM5B
chr1.202888361.202889365	ENSG00000183155	0	0.595958	0.141145	TRUE	FALSE	TRUE	TRUE	RABIF
chr1.202926824.202927417	ENSG00000117153	1219	0.444995	0.0795882	FALSE	FALSE	TRUE	FALSE	KLHL12
chr1.202957732.202958687	ENSG00000159346	0	-0.319484	0.344806	TRUE	FALSE	FALSE	FALSE	ADIPOR1
chr1.202958842.202958951	ENSG00000159346	-270	-0.0965093	0.553982	FALSE	FALSE	FALSE	FALSE	ADIPOR1
chr1.202967200.202967698	ENSG00000159348	0	-0.67235	0.151849	FALSE	FALSE	FALSE	FALSE	CYB5R1
chr1.202968064.202968231	ENSG00000159348	-784	-0.624025	0.287162	TRUE	TRUE	FALSE	FALSE	CYB5R1
chr1.203006538.203006788	ENSG00000163444	-598	0.430145	0.50251	FALSE	FALSE	FALSE	FALSE	TMEM183A
chr1.203007008.203007874	ENSG00000163444	0	0.609514	0.112596	FALSE	FALSE	FALSE	FALSE	TMEM183A
chr1.203026284.203026600	ENSG00000143847	0	0.385615	0.355588	FALSE	FALSE	TRUE	TRUE	PPFIA4
chr1.203271115.203271290	ENSG00000133063	2351	0.583763	0.0530972	FALSE	FALSE	FALSE	FALSE	CHIT1
chr1.203273152.203273579	ENSG00000133063	62	0.191435	0.425196	FALSE	FALSE	FALSE	FALSE	CHIT1
chr1.203287139.203287932	ENSG00000231507	0	0.168775	0.163861	TRUE	FALSE	TRUE	TRUE
chr1.203289377.203290963	ENSG00000231507	2225	0.712073	0.0415267	TRUE	TRUE	TRUE	TRUE
chr1.203304785.203307912	ENSG00000233791	0	0.18851	0.0657264	TRUE	TRUE	TRUE	TRUE	LINC01136
chr1.203304785.203307912	ENSG00000159388	0	0.898767	0.009551	TRUE	TRUE	TRUE	TRUE	BTG2
chr1.203308386.203311374	ENSG00000159388	2895	0.882299	0.085036	TRUE	TRUE	TRUE	TRUE	BTG2
chr1.203625692.203626909	ENSG00000058668	0	0.716401	0.248909	TRUE	TRUE	FALSE	FALSE	ATP2B4
chr1.203627898.203628042	ENSG00000058668	1337	-0.442383	0.109247	FALSE	FALSE	FALSE	FALSE	ATP2B4
chr1.203628839.203629131	ENSG00000058668	2278	0.56346	0.099058	TRUE	TRUE	FALSE	FALSE	ATP2B4
chr1.203629555.203629753	ENSG00000058668	2994	0.388451	0.330313	TRUE	FALSE	FALSE	FALSE	ATP2B4
chr1.203764806.203765865	ENSG00000122188	0	0.722107	0.141217	FALSE	FALSE	FALSE	FALSE	LAX1
chr1.203795350.203796446	ENSG00000058673	0	-0.162631	0.508182	TRUE	TRUE	TRUE	TRUE	ZC3H11A
chr1.203795350.203796446	ENSG00000257315	0	0.677042	0.205629	TRUE	TRUE	FALSE	FALSE	ZBED6
chr1.203861337.203861893	ENSG00000182004	0	-0.085819	0.259579	FALSE	FALSE	TRUE	TRUE	SNRPE
chr1.204411006.204411129	ENSG00000158615	662	0.474498	0.0512686	FALSE	FALSE	TRUE	TRUE	PPP1R15B
chr1.204411322.204412399	ENSG00000158615	0	0.612129	0.0601751	TRUE	TRUE	TRUE	TRUE	PPP1R15B
chr1.204493891.204495272	ENSG00000133056	0	-0.0290139	0.570332	FALSE	FALSE	TRUE	TRUE	PIK3C2B
chr1.204513125.204513689	ENSG00000198625	-2690	0.537913	0.144005	TRUE	FALSE	FALSE	FALSE	MDM4
chr1.204516208.204517345	ENSG00000198625	0	0.441014	0.251761	TRUE	TRUE	FALSE	FALSE	MDM4
chr1.205121763.205122469	ENSG00000117222	0	-0.747087	0.056515	TRUE	FALSE	FALSE	FALSE	RBBP5
chr1.205211164.205212143	ENSG00000133059	0	-0.0653323	0.292917	FALSE	FALSE	TRUE	TRUE	DSTYK
chr1.205227634.205228009	ENSG00000133069	-167	0.679938	0.25452	FALSE	FALSE	TRUE	TRUE	TMCC2
chr1.205228730.205229035	ENSG00000133069	554	0.193404	0.13128	TRUE	TRUE	TRUE	TRUE	TMCC2
chr1.205229561.205229735	ENSG00000133069	1385	0.605938	0.00812771	FALSE	FALSE	TRUE	TRUE	TMCC2
chr1.205319643.205319820	ENSG00000163545	1971	0.834057	0.0944961	TRUE	TRUE	TRUE	FALSE	NUAK2
chr1.205320714.205320790	ENSG00000163545	1001	-0.748594	0.17332	FALSE	FALSE	TRUE	FALSE	NUAK2
chr1.205321282.205321466	ENSG00000163545	325	0.290506	0.281744	TRUE	TRUE	TRUE	FALSE	NUAK2
chr1.205321677.205322086	ENSG00000163545	0	0.942911	0.000496485	TRUE	TRUE	TRUE	FALSE	NUAK2
chr1.205631064.205632411	ENSG00000158711	0	-0.142291	0.413335	FALSE	FALSE	TRUE	TRUE	ELK4
chr1.205679842.205680210	ENSG00000158715	249	0.434623	0.343877	TRUE	FALSE	FALSE	TRUE	SLC45A3
chr1.205748531.205748732	ENSG00000069275	1544	-0.473105	0.194094	FALSE	FALSE	TRUE	TRUE	NUCKS1
chr1.205749103.205750486	ENSG00000069275	0	-0.104686	0.119833	FALSE	FALSE	TRUE	TRUE	NUCKS1
chr1.205772666.205773082	ENSG00000117280	2378	0.0293141	0.185009	TRUE	TRUE	FALSE	FALSE	RAB29
chr1.205774290.205774473	ENSG00000117280	987	-0.263275	0.35439	FALSE	FALSE	FALSE	FALSE	RAB29
chr1.205774653.205774758	ENSG00000117280	702	0.116369	0.656292	FALSE	FALSE	FALSE	FALSE	RAB29
chr1.205775029.205775615	ENSG00000117280	0	-0.0823446	0.16906	TRUE	FALSE	FALSE	FALSE	RAB29
chr1.205812649.205812767	ENSG00000133065	981	-0.146716	0.209716	FALSE	FALSE	TRUE	TRUE	SLC41A1
chr1.205812950.205813817	ENSG00000133065	0	-0.829636	0.0269355	TRUE	TRUE	TRUE	TRUE	SLC41A1
chr1.205850069.205850347	ENSG00000162877	0	0.909373	0.0334841	FALSE	FALSE	FALSE	FALSE	PM20D1
chr1.206202778.206204344	ENSG00000196550	70	-0.508478	0.00894409	FALSE	FALSE	TRUE	FALSE	FAM72A
chr1.206202778.206204344	ENSG00000266028	0	-0.125674	0.556279	FALSE	FALSE	FALSE	FALSE	SRGAP2
chr1.206469510.206469647	ENSG00000263528	-829	-0.610391	0.219362	FALSE	FALSE	FALSE	FALSE	IKBKE
chr1.206470328.206470892	ENSG00000263528	0	0.00133164	0.332003	FALSE	FALSE	FALSE	FALSE	IKBKE
chr1.206471058.206471290	ENSG00000263528	582	0.757836	0.0941247	FALSE	FALSE	FALSE	FALSE	IKBKE
chr1.206472146.206472280	ENSG00000263528	1670	-0.819276	0.0689813	FALSE	FALSE	FALSE	FALSE	IKBKE
chr1.206507231.206507595	ENSG00000266094	0	-0.885936	0.010995	FALSE	FALSE	TRUE	TRUE	RASSF5
chr1.206612166.206612725	ENSG00000143486	0	0.126984	0.456614	FALSE	FALSE	TRUE	TRUE	EIF2D
chr1.206634400.206634498	ENSG00000143479	-1038	-0.0294965	0.0149993	FALSE	FALSE	TRUE	TRUE	DYRK3
chr1.206635280.206635996	ENSG00000143479	0	0.899602	0.0161013	TRUE	TRUE	TRUE	TRUE	DYRK3
chr1.206684808.206685008	ENSG00000162889	0	0.464326	0.00714817	TRUE	TRUE	TRUE	TRUE	MAPKAPK2
chr1.206685516.206685688	ENSG00000162889	572	-0.707352	0.0642763	FALSE	FALSE	TRUE	TRUE	MAPKAPK2
chr1.206686521.206686638	ENSG00000162889	1577	-0.0386439	0.148789	TRUE	TRUE	TRUE	TRUE	MAPKAPK2
chr1.206769441.206769726	ENSG00000136634	2768	0.407864	0.429935	TRUE	FALSE	FALSE	FALSE	IL10
chr1.206769441.206769726	ENSG00000284486	849	-0.129022	0.386539	TRUE	FALSE	TRUE	TRUE
chr1.206770557.206770785	ENSG00000136634	1709	0.714108	0.0590688	FALSE	FALSE	FALSE	FALSE	IL10
chr1.206770557.206770785	ENSG00000284486	0	0.949499	0.0201041	FALSE	FALSE	TRUE	TRUE
chr1.206897221.206897604	ENSG00000162892	0	-0.900744	0.0300188	TRUE	TRUE	TRUE	TRUE	IL24
chr1.206905362.206905637	ENSG00000271680	-291	-0.752927	0.0701391	TRUE	TRUE	TRUE	TRUE
chr1.206905362.206905637	ENSG00000226945	-1982	-0.810775	0.0383417	TRUE	TRUE	TRUE	TRUE
chr1.206905799.206906177	ENSG00000271680	0	0.90484	0.0326862	TRUE	TRUE	TRUE	TRUE
chr1.206905799.206906177	ENSG00000226945	-1442	0.913702	0.0148406	TRUE	TRUE	TRUE	TRUE
chr1.206909333.206909795	ENSG00000226945	1714	0.78242	0.000563643	TRUE	TRUE	TRUE	TRUE
chr1.206921492.206922359	ENSG00000162894	888	0.893655	0.0551326	TRUE	TRUE	TRUE	TRUE	FCMR
chr1.206922925.206923609	ENSG00000162894	0	0.941836	0.036281	TRUE	TRUE	TRUE	TRUE	FCMR
chr1.206925398.206925586	ENSG00000162894	-2151	0.702024	0.083562	FALSE	FALSE	TRUE	TRUE	FCMR
chr1.207049993.207050244	ENSG00000180667	2736	-0.367691	0.479918	FALSE	FALSE	TRUE	TRUE	YOD1
chr1.207050943.207051142	ENSG00000180667	1838	-0.264294	0.321003	FALSE	FALSE	TRUE	TRUE	YOD1
chr1.207052909.207053379	ENSG00000180667	0	0.718543	0.16164	FALSE	FALSE	TRUE	TRUE	YOD1
chr1.207320848.207322145	ENSG00000196352	0	0.85741	0.0564882	TRUE	FALSE	TRUE	TRUE	CD55
chr1.207322300.207322427	ENSG00000196352	792	0.426137	0.102822	FALSE	FALSE	TRUE	TRUE	CD55
chr1.207751827.207752905	ENSG00000117335	0	0.589883	0.272718	FALSE	FALSE	TRUE	TRUE	CD46
chr1.208244310.208244823	ENSG00000076356	0	-0.174682	0.728392	TRUE	TRUE	FALSE	FALSE	PLXNA2
chr1.208245304.208245455	ENSG00000076356	-984	-0.70647	0.0204777	FALSE	FALSE	FALSE	FALSE	PLXNA2
chr1.209673350.209673540	ENSG00000123689	-1880	0.856886	0.102221	TRUE	TRUE	FALSE	FALSE	G0S2
chr1.209755752.209756922	ENSG00000009790	0	0.914073	0.0588642	TRUE	FALSE	TRUE	TRUE	TRAF3IP3
chr1.209784268.209784851	ENSG00000162757	0	-0.817431	0.157197	FALSE	FALSE	TRUE	TRUE	C1orf74
chr1.209806099.209806273	ENSG00000117595	0	0.543686	0.110552	FALSE	FALSE	TRUE	TRUE	IRF6
chr1.209827598.209828502	ENSG00000117597	0	0.506663	0.284573	FALSE	FALSE	TRUE	TRUE	UTP25
chr1.210328776.210329505	ENSG00000054392	524	-0.387236	0.465262	TRUE	TRUE	FALSE	FALSE	HHAT
chr1.211258381.211260009	ENSG00000117625	4	0.813383	0.0447638	TRUE	TRUE	TRUE	TRUE	RCOR3
chr1.211260246.211261056	ENSG00000117625	1869	-0.152912	0.154168	TRUE	TRUE	TRUE	TRUE	RCOR3
chr1.211323258.211323725	ENSG00000082512	-2890	-0.646822	0.0754217	TRUE	TRUE	TRUE	TRUE	TRAF5
chr1.211326676.211326888	ENSG00000082512	61	0.596162	0.0376684	FALSE	FALSE	TRUE	TRUE	TRAF5
chr1.211327425.211327834	ENSG00000082512	810	0.322438	0.32975	TRUE	TRUE	TRUE	TRUE	TRAF5
chr1.211381997.211382103	ENSG00000153363	-700	0.110949	0.158123	TRUE	FALSE	TRUE	TRUE	LINC00467
chr1.211382670.211382876	ENSG00000153363	0	-0.164022	0.0954226	FALSE	FALSE	TRUE	TRUE	LINC00467
chr1.211577789.211578132	ENSG00000170385	610	0.593718	0.135485	FALSE	FALSE	FALSE	FALSE	SLC30A1
chr1.211578381.211579764	ENSG00000170385	0	0.650254	0.0113779	TRUE	TRUE	FALSE	FALSE	SLC30A1
chr1.211675582.211675877	ENSG00000117650	0	0.60207	0.155402	FALSE	FALSE	TRUE	FALSE	NEK2
chr1.211830399.211830944	ENSG00000123684	0	-0.632652	0.0980479	FALSE	FALSE	FALSE	FALSE	LPGAT1
chr1.212034977.212036023	ENSG00000143493	0	-0.717646	0.173102	FALSE	FALSE	TRUE	TRUE	INTS7
chr1.212034977.212036023	ENSG00000143476	0	-0.507389	0.313524	FALSE	FALSE	TRUE	TRUE	DTL
chr1.212284594.212286580	ENSG00000066027	0	0.596009	0.106154	TRUE	TRUE	TRUE	TRUE	PPP2R5A
chr1.212414279.212415118	ENSG00000065600	0	0.250717	0.493409	FALSE	FALSE	TRUE	TRUE	PACC1
chr1.212432736.212433504	ENSG00000117691	0	0.605623	0.210482	FALSE	FALSE	FALSE	FALSE	NENF
chr1.212558540.212559207	ENSG00000260805	524	0.394604	0.170796	TRUE	TRUE	TRUE	TRUE
chr1.212566837.212567450	ENSG00000162772	1503	0.676326	0.124447	TRUE	TRUE	TRUE	TRUE	ATF3
chr1.212699173.212700831	ENSG00000123685	0	0.926408	0.0548433	TRUE	TRUE	TRUE	TRUE	BATF3
chr1.212701167.212701483	ENSG00000123685	-1182	0.757018	0.0824223	TRUE	TRUE	TRUE	TRUE	BATF3
chr1.212791489.212791953	ENSG00000117697	0	0.290519	0.386567	FALSE	FALSE	TRUE	TRUE	NSL1
chr1.212791489.212791953	ENSG00000203705	0	0.334818	0.369073	FALSE	FALSE	TRUE	TRUE	TATDN3
chr1.212857668.212858886	ENSG00000198468	0	0.783007	0.0179404	TRUE	FALSE	TRUE	FALSE	FLVCR1-DT
chr1.212857668.212858886	ENSG00000162769	0	0.586358	0.226972	TRUE	FALSE	TRUE	FALSE	FLVCR1
chr1.213015120.213015986	ENSG00000174606	0	-0.328892	0.352642	FALSE	FALSE	TRUE	TRUE	ANGEL2
chr1.213050929.213051796	ENSG00000136643	0	0.393431	0.0276921	TRUE	FALSE	TRUE	TRUE	RPS6KC1
chr1.214280678.214281748	ENSG00000143499	0	0.798367	0.000246334	FALSE	FALSE	TRUE	TRUE	SMYD2
chr1.214602845.214603496	ENSG00000117724	0	0.755453	0.00536007	TRUE	TRUE	TRUE	TRUE	CENPF
chr1.217630973.217631425	ENSG00000092978	0	0.170249	0.299694	FALSE	FALSE	TRUE	TRUE	GPATCH2
chr1.218284934.218285383	ENSG00000067533	0	0.544051	0.292893	FALSE	FALSE	TRUE	TRUE	RRP15
chr1.219173696.219174297	ENSG00000143353	0	0.246504	0.143014	FALSE	FALSE	TRUE	TRUE	LYPLAL1
chr1.220045633.220045801	ENSG00000136628	857	0.74663	0.131173	TRUE	FALSE	TRUE	TRUE	EPRS1
chr1.220046048.220046818	ENSG00000136628	0	-0.624339	0.185729	FALSE	FALSE	TRUE	TRUE	EPRS1
chr1.220089721.220090428	ENSG00000162813	34	-0.403134	0.567775	FALSE	FALSE	TRUE	TRUE	BPNT1
chr1.220093896.220094620	ENSG00000067704	0	-0.224635	0.00843806	FALSE	FALSE	TRUE	TRUE	IARS2
chr1.220272155.220272862	ENSG00000118873	0	0.653167	0.101683	FALSE	FALSE	TRUE	TRUE	RAB3GAP2
chr1.220690146.220690574	ENSG00000162817	301	0.258711	0.135099	FALSE	FALSE	TRUE	FALSE	C1orf115
chr1.221741001.221741163	ENSG00000143507	1013	0.375348	0.330261	FALSE	FALSE	TRUE	TRUE	DUSP10
chr1.221741343.221743455	ENSG00000143507	0	0.813025	0.0741196	TRUE	TRUE	TRUE	TRUE	DUSP10
chr1.222589784.222590231	ENSG00000143498	0	-0.640032	0.0478458	FALSE	FALSE	TRUE	FALSE	TAF1A
chr1.222589784.222590231	ENSG00000225265	0	0.353285	0.196797	FALSE	FALSE	FALSE	FALSE	TAF1A-AS1
chr1.222617534.222618179	ENSG00000154305	0	0.79454	0.116404	TRUE	TRUE	TRUE	TRUE	MIA3
chr1.222618567.222618735	ENSG00000154305	481	0.600885	0.0399929	FALSE	FALSE	TRUE	TRUE	MIA3
chr1.222711391.222711667	ENSG00000186063	1543	-0.302815	0.0368103	FALSE	FALSE	TRUE	TRUE	AIDA
chr1.222711391.222711667	ENSG00000162819	-886	-0.455548	0.157749	FALSE	FALSE	TRUE	TRUE	BROX
chr1.222711898.222713810	ENSG00000186063	0	0.347278	0.117918	TRUE	FALSE	TRUE	TRUE	AIDA
chr1.222711898.222713810	ENSG00000162819	0	0.880698	0.0435538	TRUE	FALSE	TRUE	TRUE	BROX
chr1.222814542.222814644	ENSG00000228106	-378	0.427722	0.24828	FALSE	FALSE	TRUE	TRUE
chr1.222814903.222815475	ENSG00000228106	0	0.551205	0.326313	TRUE	TRUE	TRUE	TRUE
chr1.223142924.223143456	ENSG00000187554	0	0.807268	0.116015	FALSE	FALSE	TRUE	TRUE	TLR5
chr1.223143925.223144101	ENSG00000187554	-643	0.909581	0.0859394	FALSE	FALSE	TRUE	TRUE	TLR5
chr1.223363633.223363742	ENSG00000143502	460	-0.616421	0.205475	FALSE	FALSE	TRUE	TRUE	SUSD4
chr1.223364017.223364667	ENSG00000143502	0	0.65609	0.11625	FALSE	FALSE	TRUE	TRUE	SUSD4
chr1.223703080.223703244	ENSG00000162909	1487	-0.884673	0.0755354	TRUE	FALSE	TRUE	TRUE	CAPN2
chr1.223844679.223845065	ENSG00000143514	907	-0.739895	0.155136	FALSE	FALSE	FALSE	FALSE	TP53BP2
chr1.223845344.223846562	ENSG00000143514	0	0.474919	0.287531	TRUE	FALSE	FALSE	FALSE	TP53BP2
chr1.223992282.223993190	ENSG00000272645	0	0.185956	0.205379	FALSE	FALSE	TRUE	TRUE
chr1.223992282.223993190	ENSG00000185495	0	0.0614858	0.0441985	FALSE	FALSE	TRUE	TRUE
chr1.224113943.224114191	ENSG00000143756	0	0.681088	0.12664	FALSE	FALSE	FALSE	FALSE	FBXO28
chr1.224114669.224114741	ENSG00000143756	582	-0.0757877	0.13196	FALSE	FALSE	FALSE	FALSE	FBXO28
chr1.224329873.224330537	ENSG00000143748	0	-0.51693	0.167251	TRUE	TRUE	TRUE	FALSE	NVL
chr1.224356671.224357650	ENSG00000143771	0	0.357598	0.0559069	FALSE	FALSE	TRUE	TRUE	CNIH4
chr1.224434706.224435646	ENSG00000162923	1387	-0.857283	0.0960952	FALSE	FALSE	TRUE	TRUE	WDR26
chr1.224434706.224435646	ENSG00000143786	46	-0.870082	0.0127518	FALSE	FALSE	FALSE	FALSE	CNIH3
chr1.225426963.225427208	ENSG00000143815	1717	0.566534	0.108346	FALSE	FALSE	TRUE	TRUE	LBR
chr1.225427545.225429029	ENSG00000143815	0	-0.324605	0.159885	TRUE	TRUE	TRUE	TRUE	LBR
chr1.225777326.225778441	ENSG00000143742	0	-0.7599	0.0643077	TRUE	TRUE	TRUE	TRUE	SRP9
chr1.225809950.225810393	ENSG00000143819	0	-0.459972	0.238814	TRUE	TRUE	TRUE	TRUE	EPHX1
chr1.225879934.225880079	ENSG00000196187	2290	0.882136	0.0195547	TRUE	FALSE	TRUE	TRUE	TMEM63A
chr1.225880418.225880510	ENSG00000196187	1859	0.64441	0.274035	FALSE	FALSE	TRUE	TRUE	TMEM63A
chr1.225881151.225881343	ENSG00000196187	1026	0.368463	0.362439	FALSE	FALSE	TRUE	TRUE	TMEM63A
chr1.225881664.225881901	ENSG00000196187	468	0.886913	0.0364833	TRUE	TRUE	TRUE	TRUE	TMEM63A
chr1.225882137.225882901	ENSG00000196187	0	0.824742	0.138834	TRUE	FALSE	TRUE	TRUE	TMEM63A
chr1.225883143.225883382	ENSG00000196187	-774	0.353591	0.10355	FALSE	FALSE	TRUE	TRUE	TMEM63A
chr1.225923666.225924529	ENSG00000143811	0	0.0112714	0.148104	FALSE	FALSE	TRUE	TRUE	PYCR2
chr1.225999072.226000234	ENSG00000143751	0	0.0705115	0.59717	TRUE	TRUE	TRUE	TRUE	SDE2
chr1.226002027.226002599	ENSG00000143751	-2696	0.00780148	0.278479	TRUE	TRUE	TRUE	TRUE	SDE2
chr1.226061761.226063789	ENSG00000163041	0	-0.115922	0.417325	TRUE	TRUE	TRUE	TRUE	H3-3A
chr1.226064313.226064502	ENSG00000163041	2462	-0.167618	0.509898	FALSE	FALSE	TRUE	TRUE	H3-3A
chr1.226186426.226187061	ENSG00000182827	0	-0.195237	0.628447	FALSE	FALSE	TRUE	TRUE	ACBD3
chr1.226308880.226309521	ENSG00000183814	348	-0.064867	0.115216	FALSE	FALSE	TRUE	TRUE	LIN9
chr1.226407442.226408457	ENSG00000143799	0	0.032067	0.458738	FALSE	FALSE	TRUE	TRUE	PARP1
chr1.226674890.226675411	ENSG00000228382	0	0.949448	0.0215633	TRUE	TRUE	TRUE	TRUE
chr1.226675820.226675919	ENSG00000228382	-753	-0.279285	0.264155	FALSE	FALSE	TRUE	TRUE
chr1.226676125.226676271	ENSG00000228382	-1058	-0.705209	0.198922	FALSE	FALSE	TRUE	TRUE
chr1.226677223.226677651	ENSG00000228382	-2156	0.946536	0.037056	TRUE	TRUE	TRUE	TRUE
chr1.226737285.226737513	ENSG00000143772	1810	-0.306227	0.0312819	TRUE	TRUE	TRUE	TRUE	ITPKB
chr1.226737932.226738851	ENSG00000143772	472	-0.255484	0.22903	FALSE	FALSE	TRUE	TRUE	ITPKB
chr1.226739034.226739954	ENSG00000143772	0	0.981671	0.00515859	TRUE	TRUE	TRUE	TRUE	ITPKB
chr1.226870507.226870657	ENSG00000143801	323	0.873971	0.0408778	FALSE	FALSE	FALSE	FALSE	PSEN2
chr1.227563376.227563972	ENSG00000181450	0	0.748431	0.0578112	TRUE	TRUE	FALSE	FALSE	ZNF678
chr1.227734836.227735765	ENSG00000081692	0	0.73472	0.0352417	FALSE	FALSE	FALSE	FALSE	JMJD4
chr1.228081871.228083100	ENSG00000143761	0	-0.700451	0.137772	TRUE	FALSE	FALSE	FALSE	ARF1
chr1.228102351.228102544	ENSG00000143793	2867	0.107221	0.308495	FALSE	FALSE	FALSE	FALSE	C1orf35
chr1.228102876.228103571	ENSG00000143793	1840	0.341806	0.511015	FALSE	FALSE	FALSE	FALSE	C1orf35
chr1.228109206.228109711	ENSG00000162910	0	-0.226258	0.165183	TRUE	FALSE	FALSE	FALSE	MRPL55
chr1.228139796.228140752	ENSG00000143774	0	0.486554	0.406512	TRUE	TRUE	FALSE	FALSE	GUK1
chr1.228165222.228166723	ENSG00000181873	0	0.456441	0.484789	TRUE	FALSE	TRUE	TRUE	IBA57
chr1.228212981.228213828	ENSG00000162913	0	0.915922	0.0594569	FALSE	FALSE	TRUE	TRUE	OBSCN-AS1
chr1.228275560.228276249	ENSG00000269890	-1163	0.888691	0.00533201	TRUE	FALSE	TRUE	TRUE
chr1.228275560.228276249	ENSG00000269934	0	0.804239	0.0564145	TRUE	FALSE	TRUE	TRUE
chr1.228406368.228407257	ENSG00000154370	0	0.572322	0.11089	FALSE	FALSE	FALSE	TRUE	TRIM11
chr1.228457462.228458975	ENSG00000181218	0	0.685269	0.217129	FALSE	FALSE	TRUE	TRUE	H2AW
chr1.228459346.228459437	ENSG00000181218	-1473	-0.459801	0.315832	FALSE	FALSE	TRUE	TRUE	H2AW
chr1.228486575.228488134	ENSG00000168159	0	0.163474	0.309013	FALSE	FALSE	TRUE	TRUE	RNF187
chr1.228735248.228735465	ENSG00000116574	171	0.0329445	0.271058	FALSE	FALSE	TRUE	TRUE	RHOU
chr1.229270946.229271188	ENSG00000168118	0	0.539118	0.125556	FALSE	FALSE	FALSE	FALSE	RAB4A
chr1.229271501.229271701	ENSG00000168118	439	0.749437	0.112742	FALSE	FALSE	FALSE	FALSE	RAB4A
chr1.229342018.229343415	ENSG00000154429	0	0.944567	0.0445832	TRUE	TRUE	TRUE	TRUE	CCSAP
chr1.229508053.229508536	ENSG00000069248	0	0.107967	0.437841	FALSE	FALSE	TRUE	TRUE	NUP133
chr1.229557571.229557669	ENSG00000135776	1026	0.0069087	0.703036	FALSE	FALSE	TRUE	TRUE	ABCB10
chr1.229557952.229559373	ENSG00000135776	0	0.37223	0.24853	FALSE	FALSE	TRUE	TRUE	ABCB10
chr1.229625749.229626582	ENSG00000135801	0	0.826807	0.0359399	FALSE	FALSE	FALSE	TRUE	TAF5L
chr1.229625749.229626582	ENSG00000135763	0	0.892559	0.0545865	FALSE	FALSE	TRUE	TRUE	URB2
chr1.230642250.230642855	ENSG00000135775	0	-0.0408291	0.337923	FALSE	FALSE	TRUE	TRUE	COG2
chr1.230868234.230868672	ENSG00000119280	917	-0.198628	0.24805	FALSE	FALSE	FALSE	FALSE	C1orf198
chr1.230977391.230977603	ENSG00000143643	1272	0.435827	0.0907885	TRUE	FALSE	TRUE	FALSE	TTC13
chr1.230977391.230977603	ENSG00000173409	-1378	-0.79349	0.136919	TRUE	FALSE	TRUE	TRUE	ARV1
chr1.230978136.230979349	ENSG00000143643	0	0.73273	0.0429439	TRUE	TRUE	TRUE	FALSE	TTC13
chr1.230978136.230979349	ENSG00000173409	0	0.096157	0.696522	TRUE	TRUE	TRUE	TRUE	ARV1
chr1.231039569.231039673	ENSG00000182118	573	0.896289	0.0096642	FALSE	FALSE	TRUE	TRUE	FAM89A
chr1.231039980.231040831	ENSG00000182118	0	-0.374588	0.226931	TRUE	FALSE	TRUE	TRUE	FAM89A
chr1.231240907.231241508	ENSG00000143633	0	-0.91718	0.0249531	FALSE	FALSE	TRUE	TRUE	C1orf131
chr1.231240907.231241508	ENSG00000116906	0	-0.825551	0.167678	FALSE	FALSE	TRUE	TRUE	GNPAT
chr1.231337626.231338487	ENSG00000116903	0	0.951973	0.0326432	TRUE	TRUE	TRUE	TRUE	EXOC8
chr1.231337626.231338487	ENSG00000010072	522	-0.138218	0.607207	TRUE	TRUE	FALSE	FALSE	SPRTN
chr1.231421761.231422749	ENSG00000135766	2295	0.410493	0.359147	FALSE	FALSE	TRUE	TRUE	EGLN1
chr1.231528238.231528923	ENSG00000233461	0	-0.962951	0.0243581	TRUE	FALSE	TRUE	FALSE
chr1.231528238.231528923	ENSG00000116918	0	-0.337964	0.181277	TRUE	FALSE	TRUE	TRUE	TSNAX
chr1.231626576.231626773	ENSG00000162946	-42	0.465671	0.0693862	FALSE	FALSE	TRUE	TRUE	DISC1
chr1.231627431.231627590	ENSG00000162946	616	0.740437	0.114608	FALSE	FALSE	TRUE	TRUE	DISC1
chr1.231628293.231628826	ENSG00000162946	1478	-0.885201	0.0483422	TRUE	TRUE	TRUE	TRUE	DISC1
chr1.232950401.232950816	ENSG00000135778	0	0.679783	0.0731761	FALSE	FALSE	TRUE	TRUE	NTPCR
chr1.233294957.233295861	ENSG00000135749	0	-0.309473	0.151201	FALSE	FALSE	TRUE	TRUE	PCNX2
chr1.233327297.233327780	ENSG00000143674	0	-0.00190841	0.880941	FALSE	FALSE	TRUE	TRUE	MAP3K21
chr1.234373107.234374066	ENSG00000231663	0	0.0644353	0.578706	FALSE	FALSE	TRUE	TRUE	COA6-AS1
chr1.234373107.234374066	ENSG00000168275	0	-0.193083	0.639591	FALSE	FALSE	TRUE	FALSE	COA6
chr1.234478132.234479312	ENSG00000059588	0	0.443745	0.0363071	TRUE	TRUE	FALSE	FALSE	TARBP1
chr1.234608005.234608815	ENSG00000168264	710	0.905672	0.0862481	TRUE	TRUE	TRUE	TRUE	IRF2BP2
chr1.234609263.234609478	ENSG00000168264	47	0.82014	0.0591325	TRUE	TRUE	TRUE	TRUE	IRF2BP2
chr1.234609915.234611987	ENSG00000168264	-390	0.845044	0.0527026	TRUE	TRUE	TRUE	TRUE	IRF2BP2
chr1.235128087.235128188	ENSG00000173726	748	-0.29804	0.648702	FALSE	FALSE	TRUE	TRUE	TOMM20
chr1.235128408.235129181	ENSG00000173726	0	-0.057075	0.287741	FALSE	FALSE	TRUE	TRUE	TOMM20
chr1.235160725.235161682	ENSG00000188739	0	-0.56195	0.422087	TRUE	TRUE	TRUE	TRUE	RBM34
chr1.235326785.235326930	ENSG00000054267	1289	0.712305	0.0418909	FALSE	FALSE	TRUE	TRUE	ARID4B
chr1.235326785.235326930	ENSG00000152904	-420	0.826938	0.039626	FALSE	FALSE	TRUE	TRUE	GGPS1
chr1.235327090.235327277	ENSG00000054267	942	0.613046	0.250404	FALSE	FALSE	TRUE	TRUE	ARID4B
chr1.235327090.235327277	ENSG00000152904	-73	0.690607	0.251026	FALSE	FALSE	TRUE	TRUE	GGPS1
chr1.235327819.235329421	ENSG00000054267	0	0.827085	0.104548	TRUE	TRUE	TRUE	TRUE	ARID4B
chr1.235327819.235329421	ENSG00000152904	469	0.803388	0.0432931	TRUE	TRUE	TRUE	TRUE	GGPS1
chr1.235330401.235330490	ENSG00000054267	-2182	-0.454526	0.0766341	FALSE	FALSE	TRUE	TRUE	ARID4B
chr1.235367169.235367684	ENSG00000116957	0	0.872378	0.00064525	TRUE	TRUE	TRUE	TRUE
chr1.235504097.235505520	ENSG00000162885	0	-0.841434	0.0529659	FALSE	FALSE	TRUE	TRUE	B3GALNT2
[truncated: 18,041 more rows]
